# Supplementary material for: Evolution Analysis of the Fasciclin-Like Arabinogalactan Proteins in Plants Shows Variable Fasciclin-AGP Domain Constitutions
Source: MDPI journal article supplement (doi:10.3390/ijms20081945), 2019-04-20
Supplement: s1 [file s1]

**Figure S1. Multiple sequence alignment of FLA sequences. Fasciclin domains were divided into two types (Type 1 and Type 2). Residues with high similarity (80%, 60%) were highlighted in dark pink and light pink, respectively.**

**Type 1**

```

*          20          *          40          *          60          *          80          *          100          *          120          *          140          *          160
AtrFLA10 : -----QTLEEAV-GKH--NITIFAPRNEALERDLDPE--FKRFLLEPGNLKSLQSLILFHVIPRRIPAKNWPESDAHSH-----DTLSSDRL-T--LT-----CKNRVRKVD--L-----ASLIHPDS-IVRP----DGVIH : 107
AtrFLA11 : HEFSKFNDYLSR-TH---LASEINRRT--TITVLAVDNAAMDILAKN-----YGIYEIKNILSLHILLDYFGAKKLHQITNGT-----ALAATLYQTTGSAPGTSGFVNITDEKGG---K-VSIGADDNGG-VL----DASYV : 119
AtrFLA5  : -----
AtrFLA1  : -----TFLMPSDKDLANYN--F-----LP---GQKELMLTHSIPNSMLFKHMLHFPTGT-L--LPSARHSRFLNVSNHGS-----YSFYLN--N-----ARIVAPNV-CGST---NIRCH : 87
AtrFLA2  : -----
AtrFLA7  : -----
AtrFLA3  : -----
AtrFLA8  : -----
AtrFLA9  : -----
AtrFLA4  : -----
AtrFLA6  : -----
AtrFLA12 : -----
FLA16    : SHYTELAELVEK-ALLLQTLLEEAV-GKH--NITIFAPRNDALERNLDPL--FKSFLLEPRNLKSLQSLLMFHILPKRITSPQWPSLSH--HHR--TLSNDHL-H--LT-----VDVNTLKVD--S-----AEIIRPDD-VIRP----DGIH : 122
FLA17    : SRYTELAELVEK-ALLLQTLLEDAV-GRH--NITIFAPRNEALERDLDPE--FKRFLLEPGNLKSLQTLMLFHIIIPNRVGSNQWPSEESGRVKHH--TLGNDQV-R--LS-----NGQGKKMVD--L-----AEIIRPDD-LTRP----DGLIH : 125
FLA15    : SHYTELAELVEK-ALLLQTLLEEAV-GQH--NITIFAPRNDALEKNLDPE--FKSFLQPKNLKSLQSLLMFHILPKRITSPQFSSAVV--SHR--TLSNDHL-H--FT-----N---GKVN--S-----AEITKPDD-LTRP----DGIH : 118
FLA18    : SRYTELAELVEK-ALLLQTLLEDAV-GRH--NITIFAPRNEALERDLDPE--FKRFLQPGNLKSLQTLLLSHIIPKRVGSNQWPSEENSGRVKHV--TLGHDQVLHLSKLG-----GTNGKRLVN--S-----AVITRPDD-LTRP----DGLIH : 129
FLA1     : PSFSSFSHFLTQ-TH---LADEINRRR--TITVCAVDNAAMSALTSKG-----YTLSTLKNILSLHVLLDYFGTKKLHQIRDGS-----ALAATLFQATGAAPGTSGFVNITDLRGG---K-VGFGPDGG---DL----SSFFV : 117
FLA22    : -----TFLMPKDKTLTSTNIIN-----QQ--DSVTEFLLRHSIPSSLLFEHLNLIIPNGS-I--VPSSLPHYTLEISNGGR-----SNYFLN--N-----VKIISRN-ICSLG----SIKCH : 89
FLA20    : -----TLFAPSDQSFSGFGQP--SL-----LDMKYQLSPTRLPGETLRNLPGA-K--IPTLRSNYSLTVTNS-S-----RFGGKTSIN--N-----VVVQDSPV-FDDG---YVVIY : 86
FLA21    : -----TLFAIEDASFFNTSSL-----HP--LFLKQLLHYHTLPLMLSMDDLKKPQGT-C--LPTLLHHKSVQISTV-N-----QESRTAEVN--H-----VRITHPDM-FLGD---SLVIH : 90
FLA19    : -----
FLA4     : PNLSSFSNLLVS-SG---IAAELSGRN--SLTLLAVPNSQFSSASLDLTRLRPP-----SALADLLRFHVLLQFLSDSDLRRIPPSG-----SAVTTLYEASGRTFFGSGSVNVTRDPAS---GSVTIGSPAT-KN-----VTVL : 120
FLA10    : -----
FLA8     : -----
FLA11    : -----
FLA12    : -----
FLA7     : -----
FLA9     : -----
FLA6     : -----
FLA13    : -----
FLA14    : -----
FLA3     : -----
FLA5     : -----
FLA2     : PDFSTFNHYLSA-TH---LADEINRRQ--TITVLAVDNSAMSSILSNG-----YSLYQIRNILSLHVLLVDYFGTKKLHQITDGS-----TSTASMFQSTGSATGTSGYINITDIKGG---K-VAFGVQDDDS-KL----TAHYV : 119
CreFLA11.1 : -----
CreFLA11.4 : -----
CreFLA1  : -----
CreFLA10.2 : -----
CreFLA9  : PNLTTYLRALRA-GE---LMGRLNDVQAPPVTLFVADDSAWQVFAADAGTSVDALLTEAGGALVRHLLLYGLV---PTPLSPQQLAASPV--LNTSWAGQMVFVPQPFMGAVSSSAGTEARITGRVKVCESYAYR-V-----AYVLPAL-SL----- : 137
CreFLA8.1 : -----
EgrFLA9  : SHYTELAELVEK-ALLLQTLLETV-GRH--NITIFAPKNEALERDLDPE--FKSFLLEPRNLKSLQTLMLFHIVPSRIDSADWPEPAPSAAGHREELSLSSHRL-RLA-KR-----ESGEREVD--R-----ARVIHADA-VARP----DGVIH : 129
EgrFLA5  : SHYTELAELVEK-ALLLQSLLEDAV-GRH--NLTIFAPRNEALERDLDPE--FRRFLLEPRNLRSLQTLLLSHIVPARLGSPQWPLPDSRPAR---HPTLGSDPV-HLS-VA-----PGSGLPAVD--S-----AEVVRPDD-VVRP----DGVIH : 127
EgrFLA10 : PDFSTFNHYLSA-TH---LAAEINSRT--TITVLAVSNAAMNDLLAEH-----PTTTTLKNILSLHVLLDYFGSKKLHQITDGS-----ALAATLFQSTGSAPGSSGFVNITDLKGG---K-VGFAPPEGGSSDA---GAYFV : 120
EgrFLA11 : PEFSTFNHYLTE-TH---LAAEINSRT--TITVMALDNAAMSRLAPH-----PTIATLKNVLSLHVLLDYFGPKKLHQITNGT-----ALAATLFQATGSAPGSTGFVNITDLKGG---K-VGFAPEDNNG-RL----DTYFV : 119
EgrFLA16 : -----TVFSPADDSFARFGQP--PL-----SLLQFHFSPHALSLDTLRSLPRGA-K--ISTMNAHSLMVTTSPTS-----DYQ--VEIN--G-----VKIVGSPV-FNDG---NLVVF : 85
EgrFLA14 : -----TVFSPSDDSFAQFGQP--PL-----SLLQFHFSPHALSLDTLRSLPHGA-K--ISTMNAHSLMVTTSPTS-----DYQ--VQIN--S-----VKIIGSPV-FNDG---NLVIF : 85
EgrFLA15 : -----TVFSPSDDSFARFGQR--PL-----SLLQFHFSPHALSLDTLRSLPHGA-K--ISTMNAHSLMVTTSPTS-----DYQ--VQIN--G-----VKIVGSPV-FNDG---NLVVF : 85
EgrFLA19 : -----TFFMPDDGMLSRIV--L-----PT--NDVSHFVLRHSIPKPLLFDYLEHIPTGS-L--IPTSAAGYLVRIDNKGK-----RSYFLD--D-----VRITKPNV-CVAGS---SIRCH : 88
EgrFLA4  : -----
EgrFLA12 : PEFSTFNHYLTI-TH---LAAEINRRL--TITVLAVDNAAMNAILDKH-----LSVGTLKNVLSLHVLLVDYFGTKKLHQISNGT-----TLTSTMFQATGAAAGTAGYVNITDLKGG---K-VGFGAEDNGS-DL---NAVVF : 119
EgrFLA8  : -----
EgrFLA7  : -----
EgrFLA13 : -----
EgrFLA6  : -----
EgrFLA1b : -----
EgrFLA3b : -----
EgrFLA2b : -----
EgrFLA17 : -----TIFVIKDLFMANL-SS-----SP--WLMEEVRLRYHTSPLKLSVDLLKMPRGs-C--LPTLLAKKNVTVTRS-D-----AEQRLVEIN--G-----AVITHPNV-FLGE---RLAIH : 89
EgrFLA20 : -----TLFAPSDSSLKSCAS-----CSVPRILSEHIVPGLFSFGYIQKLAFTG-K--VETMSPGHCLTVTSATHR-----V--TNTRIFID--G-----VEISRPDM-FNNG---IVVVH : 90
OsaFLA17 : SRYTEMAELVEK-ALLLQALEDAV-AEH--NVTILAPRNEALERDIDPE--FKRFLLEPRNLNSLQSLLLFHVLPARLPSGSWPAA--AT---HPTLAGEDV-ELAAAD-----GGGGMRA--H-----AAVSRPDA-VVRT---DGVIH : 123
OsaFLA24 : SHYTELAELVEK-ALLLQTLLEDAV-GKH--NVTIFAPRNEALERDLDPE--FKRFLLEPRNLKSLQSLLLFHVLPARLPSGSWSA---VS---HPTLSGEEV-ELAAAA-----NDGAMRV-A--H-----AAVTRPDA-VLRP---DGVIH : 122
OsaFLA16 : SHYTELAELVEK-ALLLQTLLEDAV-GKG--NVTIFAPRNEALERDLDPE--FRRFLLEPRNLRSLQRLLLFHVLPARLHASDSSSPDFPSS---HPTLSGERV-DLS-----ASPMRV-G--A-----AAVTRPDA-VVRP---DGVIH : 122
OsaFLA4  : -----
OsaFLA23 : -----
OsaFLA12 : PSFADFARLLES-SP----VAGELAARS--SLTLLAVPNNNLPRSPSAF-AAASG-----ADIADVRLRYHVLLLEYLSPSDLARLPASG-----KLVTTLFQTTGRAPSDLGAVNLTVGGN---STVVVR-SPAP-FPGS---SATVL : 121
OsaFLA1  : -----
OsaFLA5  : -----
OsaFLA8  : -----
OsaFLA27 : -----

```

Type 1

|          |   |                                                                                                                                                                       |   |     |
|----------|---|-----------------------------------------------------------------------------------------------------------------------------------------------------------------------|---|-----|
| OsaFLA26 | : | -----                                                                                                                                                                 | : | -   |
| OsaFLA7  | : | -----                                                                                                                                                                 | : | -   |
| OsaFLA14 | : | -----                                                                                                                                                                 | : | -   |
| OsaFLA2  | : | -----                                                                                                                                                                 | : | -   |
| OsaFLA11 | : | PEFSKFNEMLSK-TR---LAYDINRRQ--TITVLAVDNSAMASL--DH-----FTLPTIRHILSLHILVDYYGSKKLHALSHGA-----TASSSMFQATGSAPGTTGYVNITSHKGG---K-IDFISEDADESAK---PSRYV                       | : | 118 |
| OsaFLA9  | : | -----                                                                                                                                                                 | : | -   |
| OsaFLA3  | : | -----                                                                                                                                                                 | : | -   |
| OsaFLA18 | : | -----                                                                                                                                                                 | : | -   |
| OsaFLA13 | : | -----                                                                                                                                                                 | : | -   |
| OsaFLA15 | : | -----                                                                                                                                                                 | : | -   |
| OsaFLA19 | : | -----                                                                                                                                                                 | : | -   |
| OsaFLA10 | : | -----                                                                                                                                                                 | : | -   |
| OsaFLA6  | : | -----                                                                                                                                                                 | : | -   |
| OsaFLA25 | : | -----                                                                                                                                                                 | : | -   |
| OsaFLA20 | : | -----                                                                                                                                                                 | : | -   |
| OsaFLA28 | : | -----TFLMPNDRMLSTAT--I-----PE---SQVMEFLSRHSIPAPLMFDDLIKLPNAT-I---VPTAHSSQTITITNVKH-----QKIYFN--N-----IELISPDV-CRVGD---LFRCH                                           | : | 88  |
| PabFLA22 | : | SRYTELAELVEK-ASLLQPLEEVV-GNN--NITILAPQNAHLEKNLDPE--FKRFMHEPGNLSNLQRLQLQSHIIPRRITAEEWSNAT-----HEALSKDGL--QFSV-----KENNIKAVD--L-----AVLTRPNA-VVRP---DGVIH               | : | 122 |
| PabFLA9  | : | -----                                                                                                                                                                 | : | -   |
| PabFLA1  | : | -----TFFVPSDDALSRLPVQ-----A---EFTSSILQYHIIPQQLSSYDLQRLDVGM-R---LPTLLANQTIIVVTSNTQ-----PNYTVD--D-----TLVTHPDI-FYDG---TFAVH                                             | : | 87  |
| PabFLA2  | : | -----TFFVPSDDALSRLPVQ-----T---EFTSSILQYHIIPQQLSSYDLQRLDVGM-R---LPTLLANQTIIVVTSNRQ-----PNYTVD--D-----TLVTHPDI-FYDG---TFAVH                                             | : | 87  |
| PabFLA3  | : | -----TFFVPSDDALSRLPVQ-----T---EFTSSILQYHIIPQQLSSYALQRFDVGM-R---LPTLLANQTIIVVTSNRQ-----PNYTVD--D-----TLVTHPDI-FYDD---TFAVH                                             | : | 87  |
| PabFLA4  | : | -----TFFMPSDQALAEVNL-Q-----VT---SYISELVLRHSVHQPLKFNHLLHFPTGT-L---IPSSFPNYMLKVSNNGR-----NDFYLN--Y-----VHIVHPNV-CRASP---SISCH                                           | : | 89  |
| PabFLA17 | : | SHYTELAELVEK-ALLQTL EEVV-GSS--NVTIFAPQNDILERKLDPE--FKRFLHEPGNLKALQKLLMFHVVPRRIVAE EWRNG-T-----HQT LAKDRL--KLSM-----KGD KKT-ID--L-----ASVAHPNA-VVRP---DGVIH            | : | 120 |
| PabFLA15 | : | PEFETFNKLLTD-TN---VAKDINNRT--SLTILALPNSILENYMARFGGNLQV-----MEIESVLQYHVLL EYMDWDRLHQMTNRG-----TLITTLYQTTGRAPKDSGSVNITCEKNG--EIRIRAPA-PY-GGSF---NATVT                   | : | 123 |
| PabFLA5  | : | -----                                                                                                                                                                 | : | -   |
| PabFLA20 | : | PEFTTFNNLLTA-TN---VAGEINNRS--SLTILALSNAQLEPFISFGGNLPT-----QEVSDVLR YHVLL EYLDWERLKMMPAAG-----TLVTTLYQTTGRAPNNTGAVNITTGGGN---NGQVRIGMPVP-GAAY---NATID                  | : | 124 |
| PabFLA21 | : | PEYSKFNHDL SQ-TK---LADEINSRQ--TITVLALSNSEMASLSG-----LDLASLKRVL SLHVLDFFDAKKLHEITNGT-----TLSTTLYQTTGNAPGNTGFINITDLKAG---K-VGFGPAAHGA-KL---DATYV                        | : | 117 |
| PabFLA16 | : | -DYSSFNSYLTQ-TK---LADEINSRT--TITVLALNNGAMSVLTSKR-----LSLSVMKKVLSLHVLLDYFDGEK LHQISNGT-----MLSTTLYQTTSGNALGKSGFLNITDLKGG---K-VGFGAASPGA-KL---DSMFV                     | : | 118 |
| PabFLA10 | : | -----                                                                                                                                                                 | : | -   |
| PabFLA6  | : | -----                                                                                                                                                                 | : | -   |
| PabFLA11 | : | -----                                                                                                                                                                 | : | -   |
| PabFLA18 | : | --FTSLGMHLQ--SS---Q-DLLV-GLKGPLTLFAPTEEAFRYFNSP-----NSSSNSSSDYLLPYHIAKGLFTY TQLQMLPDGT-K---LDTIAS EGSLLVTFNSR GGDQDLIYSSA QTL--VDYRPVYVN--G-----VLVSHPDL-LNDG---LLTIH | : | 130 |
| PabFLA7  | : | -----FANA LQM-VD---I-THLF-SSGGSYTF FAPPDEALEALGSA-----SKS-WQEFMDAVRYHIVNQLSYYNLKHLPDGA-R---LGTLLRSRSLTFTTFAPE-----SENETLMVN--N-----VSVSFPDL-----                      | : | 105 |
| PabFLA19 | : | -----NLLV-GRAGPLTIFAPTEEAFRNFNSS-----NSSSDLSSDYLLSHHIAKGLFTY AHLVMQPDGK-K---LDTIASVGSIVVTFNSHGDLS---SSTQLR--AEYRPVYLN--G-----VLLSHPDL-LSDG---LLTIH                    | : | 114 |
| PabFLA12 | : | -----                                                                                                                                                                 | : | -   |
| PabFLA13 | : | -----                                                                                                                                                                 | : | -   |
| PabFLA8  | : | -----                                                                                                                                                                 | : | -   |
| PabFLA14 | : | -----                                                                                                                                                                 | : | -   |
| PabFLA23 | : | -----                                                                                                                                                                 | : | -   |
| PabFLA24 | : | -----TFLMPSDEKLAHAA-----ASKVDLLMHHTIPRPLTFHDLLHFPTGS-F---IPSF LPDYMYSVANDGK-----NNFSLN--N-----VKIVTPDL-CNGSP---AIQCH                                                  | : | 85  |
| PpaFLA10 | : | SQYSEMVLYLDK-ADMLEELEREVL RQK--AITLFAPKNSHLEQLD-AD--LGRFLMRPGHEEYLR T VLR YHVIPGRVEGADFQNR TV-----ETLSKGDVVGL--R-----TYGLKRYVG--L-----LRVFS PNS-IVRK---DGIVH          | : | 121 |
| PpaFLA11 | : | SQYSEMVLYLDK-ADMLEELEREVLRRG--AITVFAPKNSYLEQQVDAD--LWRFLMRPGHEAYLR TLLKHHVIPGRVEGADFQNR TV-----ETLASGNVVGL--R-----SHGLKRYVE--S-----ARVFS PNS-IVRK---DGIVH             | : | 122 |
| PpaFLA6  | : | -----TLLAPNDNAFSNVLMN-----ST---TYLT TLLTYHGA AKVYSYEGLLNLPVGT-K---IPSTAANVVIVVTSNSK-----GAYKLD--D-----SQIVDPDI-FVDN---TVAVH                                           | : | 88  |
| PpaFLA7  | : | -----TLFAPDDGAFSGLNLN-----SS---KLLMTTLDYHVATSVYNYNQLSTLPLNS-T---IKTSVPDVVILITSTGT-----SGLRLD--N-----VAISDPDL-YVDS---QIAVH                                             | : | 88  |
| PpaFLA8  | : | -----TLFAPDDGAFSGLNMN-----SS---SLMTTLDYHVATSVYNFNQLSNLPLNS-T---IKTSAPNVEIFVTSTGT-----DGLRLD--N-----VAISDPDL-YADG---QMAVQ                                              | : | 88  |
| PpaFLA9  | : | -----TFFAPDDGAFSGLNMN-----NS---MLFMNTLHYHVATAVYSYQQLSYLPLNS-T---IQTAAPNVVMYITSTGE-----DGLMLD--N-----VVISDPDL-YLDD---KVAVH                                             | : | 88  |
| PpaFLA1  | : | -----                                                                                                                                                                 | : | -   |
| PpaFLA2  | : | -----                                                                                                                                                                 | : | -   |
| PpaFLA3  | : | -----                                                                                                                                                                 | : | -   |
| PpaFLA4  | : | AGLTSSADAIQA-AV----ISGSIT-LPSSNFTIFAPVNQAVDSILPS-----N---PDLSKVLNYHLATTDLPHKALLLPIGQ-R---IPTLLPDNTLLVTDNNL-----ANYSIN--N-----EQILYFDL-----                            | : | 104 |
| PpaFLA5  | : | -----                                                                                                                                                                 | : | -   |
| PpaFLA12 | : | -----TIFAPNDGALSDFHKRK-----TQ---EHLENLVRFHIIITPLPFSNLLRMEAGS-R---LKTAVSNFTILVTNTTK-----DAYQVD--D-----ATIIDPDL-YTGA---TIAVH                                            | : | 89  |
| PtFLA1   | : | SHYTELAELVEK-ALLQTL EDAV-GKH--NITIFAPKNEALERDLDPE--FKRFLLEPGNLKSLQTLLLYHIVPNRINPSHNSSLQH-----HSTLCRDRV---KLSS-----QESGEK LID--S-----AKIIQVNA-VERP---DGVIH             | : | 122 |
| PtFLA19  | : | SHYTELAELVEK-ALLQTL EDAV-GKH--NITIFAPRNEALERDLDPE--FKRFLLEPGNLKSLQTLLLYHIVPNRINLSHNSSLHH-----HSTLCRDRI---KLGS-----Q-SGEK LID--S-----AKIIQVNA-VERP---DGVIH             | : | 121 |
| PtFLA6   | : | SHYTELAELVEK-ALLQTL EEAV-GKH--NITIFAPRNEALERQLDPE--FKRFLLEPGNLKSLQTLVLFHII PQRVGSNDWPGHKSNPSRHT---TLCNDHL---HLIT-----KNSGKKVVG--S-----ADVTRPDD-VTRP---DGVIH           | : | 126 |
| PtFLA8   | : | SHYTELAELVEK-ALLQTL EEAV-GKH--NITIFAPKNEALERQLDPE--FKRFLLEPGNLKSLQTLLLFHII PQRVGSNDWPGHKSNPTRHT---TLCNDHL---HLIT-----KNSGKKLVG--A-----AVLTRPDD-VTRP---DGVIH           | : | 126 |
| PtFLA5   | : | PSFSTFNHYLTL-TH---LAGEINSRN--TITVCAVDNAAMSELLSKH-----PSIATIKNILSLHVLLDYFGTKKLHQIREGT-----ALAATMFQATGSAPGSTGFVNITDVKGG---K-VAFGPEDNEG-NL---DVFYV                       | : | 119 |
| PtFLA22  | : | PSLSTFNHYLTL-TH---LAGEINNRT--TITVCAVDNAAMSEILSKK-----PSISTIKNILSLHVLLDYFGTKKLHQIRDGT-----ALAATMFQATGSAPGSTGFVNITDVKGG---K-VAFGPKDNGG-NL---DVFYV                       | : | 119 |
| PtFLA42  | : | -----TIFAPLDIAFARLGQL-----SV-----LDLQYHISPVRLSGYYLDSLPFGT-R---IPTLLPNHSLIVTTLSL-----YFDGKLSIN--G-----ISIEESAL-VDFG---SLIIF                                            | : | 87  |
| PtFLA51  | : | -----TFLMPKDRLLSKIR--M-----HQ---NAVSDFL LHHSIPSPLLFDHLRHIPP GS-L---IPSSDPDYMLNISNEGR-----KSFFLN--N-----VKISSPDL-CTAGS---SIRCH                                         | : | 88  |
| PtFLA52  | : | -----TFFIPSDNSLSPTT-----T---SADPDIFPYHIVPQRLSFADLQQKTF S-R---LPTLLFDKSLITNNSA-----SNFTLD--G-----SRLTHPDI-YTNA---AITVH                                                 | : | 85  |
| PtFLA37  | : | -----                                                                                                                                                                 | : | -   |
| PtFLA17  | : | -----                                                                                                                                                                 | : | -   |
| PtFLA53  | : | SHYTELAELVEK-ALLQTL EDVV-GKH--NITIFAPKNEALERDLDPE--FKRFLLEPGNLKSLQTLLLYHIVPNRINPSHNSSLQH-----HRTLCRDRV---KLSS-----QESGEK LID--S-----AKIIQVNA-VERP---DGVIH             | : | 122 |
| PtFLA41  | : | SHYTELAELVEK-ALLQTL EDAV-GKH--NITIFAPKNEALERDLDPE--FQRFLEPGNLKSLQTLLLYHIVPNRINPSHNSSLQH-----NSTLCRDRV---KLSS-----QESGEK LID--S-----AKIIQVNA-VERP---DGVIH              | : | 122 |
| PtFLA38  | : | PDFSSFTSLITSIPS---LTS DLSDRS--ALTLLVIPNSYL-SSSLDLTRRLSP-----SALADLLRYHILLQYLSSSDLHQVPPSG-----ALITT LFQTTGRASSNSG SVNITRNPVT---NAITISSPSP-FSSS---NATVL                 | : | 123 |
| PtFLA30  | : | PDFSSFTSLLASTPS---ITS DLSNRS--ALTLLVIPNSYL-SSSLDFTRRLSP-----SSLTDLLRYHILLQYLSSSDLHQLP PAG-----ALITT LFQTTGRASSNFGSVNITRNPVT---NAITISSPSP-FSSS---NATVL                 | : | 123 |
| PtFLA20  | : | -----                                                                                                                                                                 | : | -   |
| PtFLA23  | : | -----                                                                                                                                                                 | : | -   |
| PtFLA18  | : | -----                                                                                                                                                                 | : | -   |
| PtFLA10  | : | -----                                                                                                                                                                 | : | -   |

Type 1

|            |   |                                                                                                                                                          |   |     |
|------------|---|----------------------------------------------------------------------------------------------------------------------------------------------------------|---|-----|
| PtFLA16    | : | PQFSTFNHYLTV-TH---LAAEINRRQ--TITVLALDNAAMSSLSISKQ-----LSVYTLRNVLSLHVLVDYFGTRKLHQITNGT-----ELTATMFQATGSAPGASGYVNITDLNGG---K-VAFGAEDNDG-KL---NAVYV         | : | 119 |
| PtFLA34    | : |                                                                                                                                                          | : | -   |
| PtFLA9     | : |                                                                                                                                                          | : | -   |
| PtFLA12    | : |                                                                                                                                                          | : | -   |
| PtFLA7     | : |                                                                                                                                                          | : | -   |
| PtFLA2     | : |                                                                                                                                                          | : | -   |
| PtFLA13    | : |                                                                                                                                                          | : | -   |
| PtFLA47    | : |                                                                                                                                                          | : | -   |
| PtFLA40    | : |                                                                                                                                                          | : | -   |
| PtFLA28    | : |                                                                                                                                                          | : | -   |
| PtFLA39    | : |                                                                                                                                                          | : | -   |
| PtFLA50    | : |                                                                                                                                                          | : | -   |
| PtFLA29    | : |                                                                                                                                                          | : | -   |
| PtFLA32/49 | : |                                                                                                                                                          | : | -   |
| PtFLA45    | : |                                                                                                                                                          | : | -   |
| PtFLA35    | : |                                                                                                                                                          | : | -   |
| PtFLA46    | : |                                                                                                                                                          | : | -   |
| PtFLA3     | : |                                                                                                                                                          | : | -   |
| PtFLA15    | : |                                                                                                                                                          | : | -   |
| PtFLA14    | : |                                                                                                                                                          | : | -   |
| PtFLA48    | : |                                                                                                                                                          | : | -   |
| PtFLA27    | : |                                                                                                                                                          | : | -   |
| PtFLA43    | : |                                                                                                                                                          | : | -   |
| PtFLA33    | : |                                                                                                                                                          | : | -   |
| PtFLA21    | : |                                                                                                                                                          | : | -   |
| PtFLA26    | : |                                                                                                                                                          | : | -   |
| PtFLA4     | : | -----TIFAIKDSSSLVNT-SL-----PP--WFLKNLLQYHTSPLKLSMEDVFKKPQGS-C--FPTLVDRKKLAVTKI-D-----AKERLAEIN--H-----VLVSHPDM-VLER---RITIH                              | : | 89  |
| PtFLA44    | : | -----TLFAPSDSSLRTCFS-----CSIPDLLHEHIVPGLFSIDYLRKLAFGT-K--IETLSPGRCITVTSTSLKNDS-----AT--PSTVKVFIG--G-----VEITHPDL-FNNG---VLIH                             | : | 94  |
| PtFLA24    | : | -----TFFIPSDNSLSPTT-----T--SADPDIFPYHIVPQRLSFADLQQFKTFS-R--LPTLLFDKSILITNNSA-----SNFTLD--G-----SRLTHPDI-YTNA---AITVH                                     | : | 85  |
| SmoFLA1    | : | -----TLMIPTNEAIAAFVN-L-----NQ--SEIPSLLLYHAVTGVLPHYDVLSEFPVGQ-R--LPTLLFGNQLVVTDNSA-----AGYRLN--T-----ARIVRPNM-CGNSTS--VVTCH                               | : | 90  |
| SmoFLA2    | : | -----TLLIPSNNAIAGVDANL-----SQ--EDIINTLQYHVLTFTPSTFEALSRNDVGA-E--LPTMLQGEMITVTSNSP-----GNFTLN--E-----VNITHPDV-CSSTR---FIACH                               | : | 90  |
| SmoFLA3    | : |                                                                                                                                                          | : | -   |
| SmoFLA6    | : | DHLSTFNRYLSE-TG---VIKEVDSRS--SITLFIPPNAVLDPVIASVG---A---NNLLVIADILRYHCVLQYLEIKEIRSMTNAT-----GIVLATLYQTTGKPTGEYGFVNVSVSHGG-----LIHLGVPG-AASN----ATVV      | : | 120 |
| SmoFLA7    | : | PDFSTFSKLLTD-TG---VISEINQRS--SLTLLVPHNSALDAVLNRSSPSSTP---LPLPVVADVLRyhCLLQYLDVPQIKSMTNEL-----GMLVTSLYQTTGRAAGQNGFVNVSVSSDG-----QIHAGLPF-AATS---LATVR     | : | 125 |
| SmoFLA8    | : | -NFSTFSRLLSM-TN---VTAEINSRS--SLTILVPDNSILDSYVGA---NLEG---MHVWAVADFCRYHVLLQYLDTQEIMQMTNQS-----GLLITTLYQTTGRAEGIDGFVNMTFGNDI-----QFGLPPPH-ASGP---VATVL     | : | 121 |
| SmoFLA9    | : | ---TEMMECVEQ-AGMLEALELAA-DRH--NLTIFAPRDEFLELHFDAD--FRRFLLLPGNVRFQLQELVMFHVLPIRITASQWRSGRF-----QSLSGSRD-EVLLHW-----NKKQLRAVD--R-----STVDWPDm-IVRS---DGVVH | : | 120 |
| SmoFLA4    | : |                                                                                                                                                          | : | -   |
| SmoFLA5    | : |                                                                                                                                                          | : | -   |
| BdiFLA23   | : | SHYTELSELVEK-ALLQOTLEDAV-GRH--NVTIFAPRNEALERDLDE--FKRFLLEPRNLKSLQSLLLFHVLPSRHPAASWPA---SAA---HPTLSGEDL-ELAAG-----SNGSMRV-A--H-----ASVTRPDA-VLRP---DGVIH  | : | 122 |
| BdiFLA22   | : | SRYTELSELVEK-ALLQQLEDAV-GRG--NVTIFAPRNEALERDLDE--FRAFLLQPRNLRSLQRLLLHFHVLPSRLSSSQWRSA---A---SLTLSGEHL-ELSLSD-----SSTAMLAG--S-----AAVTHPDA-VVRP---DGVIH   | : | 123 |
| BdiFLA9    | : |                                                                                                                                                          | : | -   |
| BdiFLA1    | : |                                                                                                                                                          | : | -   |
| BdiFLA2    | : | -----TFLMPSDRLLSTAS--V-----PG--NQVLDLLLRHSPVAVLMFADLNRLPNGT-V--VPTRHTNQMVITITKREH-----RQLYFN--N-----IELTSPDI-CRGGD---SFRCH                               | : | 88  |
| BdiFLA20   | : | PNFSDFLRLITS-SP---VAGELTGRS--SLTLLAVPNANLPRSPSAF-AAASG-----ADLADVLRyhVLLLEYLSPSDLARLPASG-----KLVTTLFQTTGRAPSDLGAVNLTSSAAGGHSSTVVVHSPAPS-FPGS---NATVL     | : | 126 |
| BdiFLA10   | : |                                                                                                                                                          | : | -   |
| BdiFLA11   | : |                                                                                                                                                          | : | -   |
| BdiFLA3    | : |                                                                                                                                                          | : | -   |
| BdiFLA12   | : |                                                                                                                                                          | : | -   |
| BdiFLA8    | : |                                                                                                                                                          | : | -   |
| BdiFLA13   | : |                                                                                                                                                          | : | -   |
| BdiFLA4    | : |                                                                                                                                                          | : | -   |
| BdiFLA14   | : |                                                                                                                                                          | : | -   |
| BdiFLA15   | : |                                                                                                                                                          | : | -   |
| BdiFLA16   | : |                                                                                                                                                          | : | -   |
| BdiFLA17   | : |                                                                                                                                                          | : | -   |
| BdiFLA21.1 | : |                                                                                                                                                          | : | -   |
| BdiFLA21.2 | : |                                                                                                                                                          | : | -   |
| BdiFLA5    | : |                                                                                                                                                          | : | -   |
| BdiFLA18   | : |                                                                                                                                                          | : | -   |
| BdiFLA6    | : |                                                                                                                                                          | : | -   |
| BdiFLA19   | : |                                                                                                                                                          | : | -   |
| BdiFLA7    | : |                                                                                                                                                          | : | -   |
| MpoFLA6    | : | PDFSIFNQLLTD-TR---VAGEINRRQ--GVTVLAPSNEAMTDFRSAN-PALEG-----DRVANLLRYHVLLDFLTIQNLQRDIAN-----YTRVGTLFRTTGPANADDASVNLyntPSN-----IFIGSSAV-DSSQ---NSTVI       | : | 121 |
| MpoFLA1    | : |                                                                                                                                                          | : | -   |
| MpoFLA14   | : | SQYSEWMELVEQ-AAMLHPLEELVGSGR--KLTIFAPQNHLQ---PK--IKSFLLKPSNAIALKRvVQYHVLSErVTASEWPTASF-----TTLASEAV-WL--S-----TQGPILMAG--D-----VAVAAPDA-IIRP---DGVVH     | : | 117 |
| MpoFLA4    | : | -----TLFVPTNEALSSLSM-----V---TPVLNILLYHAATPQYTFDQLVTLPVGT-R--LQSFLANESVLITNNAR-----NNFQVD--N-----VRIVLANV-CASNTTDLQISCH                                  | : | 90  |
| MpoFLA7    | : | PRFSVLSDLLVS-SG---VEKEINSRT--SITLLAPADAVLTAFQASV-PNADT-----VKIADLLRYHVLLQYFDMTelKGLGTvN-----YSSVTTLQTTGRANEQDGFVNIYNTATQ-----ILIGPAAS-ASAS---NATVV       | : | 121 |
| MpoFLA2    | : |                                                                                                                                                          | : | -   |
| MpoFLA3    | : |                                                                                                                                                          | : | -   |
| MpoFLA5    | : | -----TWLLPNDEAFSGTSY-----P---KNVTKFIDYHVIRQLLPYSRLSTLSVGT-R--LPTFLGSETVVVTSNLR-----FNYSLD--N-----AMIVVPDL-YSDS---TVAVH                                   | : | 86  |
| MpoFLA8    | : | PRFSVFREMLSS-HG---VAAEINGRK--SVTLLAPANNVMRAFRTSN-NKTDa-----IKITDLLRFHVLLTYFDMAELRALKTTN-----YTSVTTLQTTGRASGNNGFVNIYNLKSr-----VKLGPSVP-DSSS---NVTVL       | : | 121 |

Type 1

|            |   |                                                                                                                                                        |   |     |
|------------|---|--------------------------------------------------------------------------------------------------------------------------------------------------------|---|-----|
| MpoFLA9/10 | : | PSFSEMKNKLLSS-SG---VAEEINSRK--SLTLLALSNDVLTAFNASN-PNVDA-----VKLADLLRYHVLLQFLGMDDLKALPTDN-----YTAVTTTLYQTTGRANDNDGFVNIYNLPSG-----ILVGPSVA-GSSS----NATVA | : | 121 |
| MpoFLA11   | : | PSFSQMNQLLSS-SG---VANDINARK--SITVLVVSNDVLNAFTASN-PNVDT-----VKMADLLRYHVLLQFLGMDELKALPTSN-----YTSVTTTLYQTTGRANNNDGFLNIYNLPSG-----FLIGPSVA-GSSS----NATVA  | : | 121 |
| MpoFLA12   | : | PSFSQMNQLLSS-SG---VANDINARK--SITVLVVSNDVLNAFTASN-PNVDT-----VKMADLLRYHVLLQFLGMDELKALPTSN-----YTSVTTTLYQTTGRANNNDGFLNIYNLPSG-----FLIGPSVA-GSSS----NATVA  | : | 121 |
| MpoFLA13   | : | PSLSAMNQLLTS-SG---VAAEINSRT--SLTLCAVSNPVLQAFVATV-----PNVDSGEVADLLRYHVFLQYLDIPELKQIVPGSPS---T-----VTTLLQTTGRTAGNDGSVNIYYDGTA-----IQVGLPDI-TAPPN----ATIL | : | 121 |
| CcrFLA1.1  | : |                                                                                                                                                        | : | -   |
| CcrFLA1.2  | : |                                                                                                                                                        | : | -   |
| CcrFLA1.3  | : |                                                                                                                                                        | : | -   |
| CcrFLA1.4  | : |                                                                                                                                                        | : | -   |
| CbrFLA1    | : |                                                                                                                                                        | : | -   |
| CbrFLA2    | : |                                                                                                                                                        | : | -   |
| CbrFLA3    | : |                                                                                                                                                        | : | -   |
| CbrFLA4    | : |                                                                                                                                                        | : | -   |
| CbrFLA7    | : |                                                                                                                                                        | : | -   |
| CbrFLA9    | : |                                                                                                                                                        | : | -   |
| CbrFLA11   | : |                                                                                                                                                        | : | -   |
| CbrFLA15   | : |                                                                                                                                                        | : | -   |
| CbrFLA16.1 | : |                                                                                                                                                        | : | -   |
| CbrFLA16.2 | : |                                                                                                                                                        | : | -   |
| CbrFLA16.3 | : |                                                                                                                                                        | : | -   |
| CbrFLA16.4 | : |                                                                                                                                                        | : | -   |
| CbrFLA19   | : |                                                                                                                                                        | : | -   |
| CbrFLA20.1 | : |                                                                                                                                                        | : | -   |
| CbrFLA22   | : |                                                                                                                                                        | : | -   |
| CbrFLA23   | : |                                                                                                                                                        | : | -   |
| CbrFLA24   | : |                                                                                                                                                        | : | -   |

| Type 1     |   |                                         |            |                 |                     |                |                                         |                                                   |                                        | Type 2                 |             |         |       |          |      |      |     |      |   |     |
|------------|---|-----------------------------------------|------------|-----------------|---------------------|----------------|-----------------------------------------|---------------------------------------------------|----------------------------------------|------------------------|-------------|---------|-------|----------|------|------|-----|------|---|-----|
|            | * | 180                                     | *          | 200             | *                   | 220            | *                                       | 240                                               | *                                      | 260                    | *           | 280     | *     | 300      | *    | 320  | *   |      |   |     |
| AtrFLA10   | : | -GIERLLIPRSVQAEFNKRRSLTSIQAVLPEGAPEVDPR | TARLKKPAHS | -----           | -APAPP              | -----          | YTPTLPIYAAMAPGPSLA                      | --PAPAPGPGSGHHWFDGESQIKDFIHTLLHYGGYNELADILVNL-TSL | ----                                   | ATEM                   | GKLV        | S----   | EGYV  | ITV      | LAPN | :    | 244 |      |   |     |
| AtrFLA11   | : | KSVKELPYNISVLQVSKIILNSPSAE              | -----      | -AP             | -----               | APAPTEQNLTA    | -----                                   | VMTKK-GCKLFADQ                                    | -IT-ATGA                               | ----                   | EKTFVD      | -----   | AVSGG | LTA      | FCPT | :    | 194 |      |   |     |
| AtrFLA5    | : |                                         |            |                 |                     |                |                                         |                                                   |                                        |                        |             |         |       |          |      |      |     | 6    |   |     |
| AtrFLA1    | : | -GLSTIIEYE                              | -----      |                 |                     |                |                                         |                                                   |                                        |                        |             |         |       |          |      |      |     | 96   |   |     |
| AtrFLA2    | : |                                         |            |                 |                     |                |                                         |                                                   |                                        |                        |             |         |       |          |      |      |     | 33   |   |     |
| AtrFLA7    | : |                                         |            |                 |                     |                |                                         |                                                   |                                        |                        |             |         |       |          |      |      |     | 36   |   |     |
| AtrFLA3    | : |                                         |            |                 |                     |                |                                         |                                                   |                                        |                        |             |         |       |          |      |      |     | 36   |   |     |
| AtrFLA8    | : |                                         |            |                 |                     |                |                                         |                                                   |                                        |                        |             |         |       |          |      |      |     | 36   |   |     |
| AtrFLA9    | : |                                         |            |                 |                     |                |                                         |                                                   |                                        |                        |             |         |       |          |      |      |     | 33   |   |     |
| AtrFLA4    | : |                                         |            |                 |                     |                |                                         |                                                   |                                        |                        |             |         |       |          |      |      |     | 25   |   |     |
| AtrFLA6    | : |                                         |            |                 |                     |                |                                         |                                                   |                                        |                        |             |         |       |          |      |      |     | 15   |   |     |
| AtrFLA12   | : |                                         |            |                 |                     |                |                                         |                                                   |                                        |                        |             |         |       |          |      |      |     | 6    |   |     |
| FLA16      | : | -GIERLLIPRSVQEDFNRRRSLRSISAVIPEGAPEVDPR | THRLKKPS   | -----           | PAVPA               | ----           | GAPPVLPIYDAMSPGPSLA                     | --PAPAPGPGGPRGHFN                                 | GDAQVKDFIHTLLHYGGYNEMADILVNL-TSL       | ----                   | ATEM        | GRLV    | S---- | EGYV     | LTV  | LAPN | :   | 258  |   |     |
| FLA17      | : | -GIERLLIPRSVQEDFNRRRSLQSISAVLPEGAPEVDPR | TNRLKKPA   | -----           | APVPA               | ----           | GSPPALPIQSAMAPGPSLA                     | --PAPAPGPGGQHHFDGEAQVKDFIHTLLHYGGYNEMADILVNL-TSL  | ----                                   | ATEM                   | GRLV        | S----   | EGYV  | LTV      | LAPN | :    | 261 |      |   |     |
| FLA15      | : | -GIERLLIPRSVQEDFNRRRSLRSIAAVLPEGAPEVDPR | THRLKKKP   | -----           | APIPA               | ----           | GAPPVLPIYDAMSPGPSLA                     | --PAPAPGPGGPRHHFN                                 | GEAQVKDFIHTLLHYGGYNEMADILVNL-TSL       | ----                   | ATEM        | GRLV    | S---- | EGYV     | LTV  | LAPN | :   | 254  |   |     |
| FLA18      | : | -GIERLLIPRSVQEDFNRRRNLRSISAVLPEGAPEIDPR | TNRLKKSATA | -----           | VSVPA               | ----           | GSPPVLPIESAMAPGPSLA                     | --PAPAPGPGGAHKHFNGDAQVKDFIHTLLHYGGYNEMADILVNL-TSL | ----                                   | ATEM                   | GRLV        | S----   | EGYV  | LTV      | LAPN | :    | 267 |      |   |     |
| FLA1       | : | KSIEEVPYNISIIQISRVLPSETAA               | -----      | -AP             | -----               | TPAPAEMLTG     | -----                                   | IMSAH-GCKVFAET                                    | -LLTNPGA                               | ----                   | SKTYQE      | -----   | SLEGG | MTV      | FCFG | :    | 193 |      |   |     |
| FLA22      | : | -GIDGILQSP                              | -----      |                 |                     |                |                                         |                                                   |                                        |                        |             |         |       |          |      |      |     | 98   |   |     |
| FLA20      | : | -GSDEFFTSPTKISDDSSSSSSIPS-TTSSTG        | -----      | -SIPISSATQTPSPN | IASDSTRNL           | ----           | PNRSKPVNRFNIFESASRLLMSRGFVIIATF-TAL-Q-L | ----                                              | EDNTS                                  | ----                   | G           | ----    | NDTK  | ITV      | FAP  | I    | :   | 194  |   |     |
| FLA21      | : | -GVIGPFSPLQPHSDHLI                      | ----HT     | -----           | -PLCQ               | -----          | SDTTNK                                  | ----                                              | TSNNEEVPVSIWTRIVQLLSSNGFVPFAIG-THS-V-L | ----                   | NRIVNDHNHKK | ----    | NLTG  | VTI      | LATP | :    | 177 |      |   |     |
| FLA19      | : |                                         |            |                 |                     |                |                                         |                                                   |                                        |                        |             |         |       |          |      |      |     | 6    |   |     |
| FLA4       | : | KLLETKPPNITVLTVD                        | SLIVPTGID  | -----           | -ITASETLTPPPTSTSLSP | PPAGINLTQ      | -----                                   | ILINGHNE                                          | NVALSL                                 | -IVA-SGV               | ----        | ITEFEND | ----  | ER       | ---- | GAG  | ITV | FVPT | : | 211 |
| FLA10      | : |                                         |            |                 |                     |                |                                         |                                                   |                                        |                        |             |         |       |          |      |      |     | 33   |   |     |
| FLA8       | : |                                         |            |                 |                     |                |                                         |                                                   |                                        |                        |             |         |       |          |      |      |     | 33   |   |     |
| FLA11      | : |                                         |            |                 |                     |                |                                         |                                                   |                                        |                        |             |         |       |          |      |      |     | 37   |   |     |
| FLA12      | : |                                         |            |                 |                     |                |                                         |                                                   |                                        |                        |             |         |       |          |      |      |     | 36   |   |     |
| FLA7       | : |                                         |            |                 |                     |                |                                         |                                                   |                                        |                        |             |         |       |          |      |      |     | 36   |   |     |
| FLA9       | : |                                         |            |                 |                     |                |                                         |                                                   |                                        |                        |             |         |       |          |      |      |     | 36   |   |     |
| FLA6       | : |                                         |            |                 |                     |                |                                         |                                                   |                                        |                        |             |         |       |          |      |      |     | 36   |   |     |
| FLA13      | : |                                         |            |                 |                     |                |                                         |                                                   |                                        |                        |             |         |       |          |      |      |     | 36   |   |     |
| FLA14      | : |                                         |            |                 |                     |                |                                         |                                                   |                                        |                        |             |         |       |          |      |      |     | 31   |   |     |
| FLA3       | : |                                         |            |                 |                     |                |                                         |                                                   |                                        |                        |             |         |       |          |      |      |     | 31   |   |     |
| FLA5       | : |                                         |            |                 |                     |                |                                         |                                                   |                                        |                        |             |         |       |          |      |      |     | 31   |   |     |
| FLA2       | : | KSVFEKPYNISVLHISQVLT                    | SPEAE      | -----           | -AP                 | -----          | TASPSDLILT                              | -----                                             | ILEKQ-GCKAFSDI-TK-STGA                 | ----                   | DKTFQD      | -----   | TVDGG | LTV      | FCES | :    | 194 |      |   |     |
| CreFLA11.1 | : |                                         |            |                 |                     |                |                                         |                                                   |                                        |                        |             |         |       |          |      |      |     | 6    |   |     |
| CreFLA11.4 | : |                                         |            |                 |                     |                |                                         |                                                   |                                        |                        |             |         |       |          |      |      |     | 25   |   |     |
| CreFLA1    | : |                                         |            |                 |                     |                |                                         |                                                   |                                        |                        |             |         |       |          |      |      |     | 27   |   |     |
| CreFLA10.2 | : |                                         |            |                 |                     |                |                                         |                                                   |                                        |                        |             |         |       |          |      |      |     | 32   |   |     |
| CreFLA9    | : | ---TALP                                 | ----A      | -----           | -FSEARA             | APPPPPPPACANAS | ----                                    | IPD                                               | -----                                  | LLSANGNLTTTLGA-TQV-TGL | ----        | EDQLYAP | ----- | GVAPY    | TI   | FAPT | :   | 204  |   |     |
| CreFLA8.1  | : |                                         |            |                 |                     |                |                                         |                                                   |                                        |                        |             |         |       |          |      |      |     | 17   |   |     |
| EgrFLA9    | : | -GIERLLIPQSVQDDFNRRRSLRSITAVKPEGAPEVDPR | THRLKKPA   | -----           | PPAKA               | ----           | GSAPALPIYDAMAPGPSLA                     | --PAPAPGPGGPHHHFDGEAQVKDFIHTLLHYGGYNEMADILVNL-TSL | ----                                   | ASEM                   | GRLV        | S----   | EGYV  | LTV      | LAPN | :    | 265 |      |   |     |
| EgrFLA5    | : | -GIQRLIPRAVQEDFNRRRSLRSIAAVIPEGAPEVDPR  | THRLKKPA   | -----           | PPAPA               | ----           | GSAPALPIYDAMAPGPSLA                     | --PAPAPGPDGPRGHFHGEALVKDFIHTLLHYGGYNEMADILVNL-TSL | ----                                   | AVEM                   | GRLV        | S----   | EGYV  | LTV      | LAPN | :    | 263 |      |   |     |
| EgrFLA10   | : | KSLEELAYNISVIEISKVLP                    | SAIAA      | -----           | -AP                 | -----          | APEPSQVNVTD                             | -----                                             | VMAAH-GCKEFADA-TLNS                    | SDA                    | ----        | LKTYED  | ----- | NVVGGLTA | FCPL | :    | 196 |      |   |     |

## Type 1

## Type 2

```

EgrFLA11 : KGLEEIPYNISIIQISNALPSDVAA-----AP-----TPGPSEMNLTR-----LMSAH-GCKVFADT-I DANADA---MKTYED-----NVEGG-LTTFEFL : 195
EgrFLA16 : -GIEMFFDPEFQTSAPVQSPVLG-----LECV-----APR-----YGGLEDLSSGNVFGEACGAMRSKGYFAMASF-I GL-Q-I---MKL-K-----G---DNQMLTVFTPS : 166
EgrFLA14 : -GIEMFFDPEFQTSAPVQSPIPG-----LECV-----APR-----YGGSEDLSSGNVFGEACGAMRSKGY SVMASF-I GL-Q-I---MKP-K-----G---DNQMLTVFAP : 165
EgrFLA15 : -GI-----: 87
EgrFLA19 : -GIDGVLLP-----: 96
EgrFLA4 : -----HNINVAASM-I AA-SGV---VEEFQAD---EG---GAG-ITTFVET : 34
EgrFLA12 : KSVDEIPYNISVLHISQVLTSPEAE-----AP-----TPSPSNLNTA-----ILSKQ-GCKSFADL-I S-ASGA---LKTFFD-----NLEGG-LTTFCAS : 194
EgrFLA8 : -----GSFHTFLGY-I ES-TKV---IDTFQE QANS---SKDG-ITIFAPT : 36
EgrFLA7 : -----GPFQTFLSY-I ES-TKV---IDTFQNQANN---TEEG-ITTFVFK : 36
EgrFLA13 : -----PDFSTFNDF-I TQ-TKL---YEQINRR-----QTITVLALD : 31
EgrFLA6 : -----GOYTSFIRL-I TT-TQV---ANQIENQLNT---STEG-LTVFAPT : 36
EgrFLA1b : -----SQFTVLLKI-I RA-TSV---DKQINQLNN---S-NNG-LTIFAPN : 36
EgrFLA3b : -----TNL---SSQLS---NQ---KSNQGF-TIFAPT : 22
EgrFLA2b : -----GGFTVLIK-I RG-THV---SDQVDSELSD---L-NDG-ITVFAPD : 36
EgrFLA17 : -GVLQPLLHKEQELCLVQ-----S-----SKRN-----RDP-RS---LSVVEKERHLVDWGRVIRSLSSSGFVSFAIG-I QS-V-L---DGILDDNA-----DLAS-VTVFAPA : 171
EgrFLA20 : -GLEGFIAPLSPFSCSIEKMTSLAF---P-F-----SLPP-----PVSS-----SFSPSPLMRLMLRDAVLRRLRTSGF GILALA-I KI-K-Y---PEL-----V---NLQNA-LTFTVD : 174
OsaFLA17 : -GIDRLLVPRSVQDEFNRRRSLADISAMPPTAAPEVDPRTRLKKPA---PP---GDSPVLPISDATVPDPSVA---LAS---EPSDHYDGDSQVKDFIQTL LKYGGYNELAD-I VNL-TSL---ATELAQLVS---EGYA-LTVLAPN : 251
OsaFLA24 : -GIERLLVPRSVQEDFNRRRSLADISAVLPTGAPEVDPRTHRLKKPA---PPVPP---GAPPVLP IWDAMAPGPSIA--PAPAPGPGSGKHHFDGHSQVKDFIQTL LLYGGYNELAD-I VNL-TSL---ATEMGR LVS---EGYV-LTVLAPN : 258
OsaFLA16 : -GIERLLVPRSVQEDFNRRRSLAAISAVLPTGAPEVDPRTHRLKKPA---PPVPP---GAPPVLP IWDAMAPGPSIA--PAPAPGPGSGKHHFDGHSQVKDFIQTL LLYGGYNELAD-I VNL-TSL---ATEMGR LVS---EGYV-LTVLAPN : 258
OsaFLA4 : -----I AFCEP : 6
OsaFLA23 : -----: -
OsaFLA12 : GAVTAVPYNLSVLAVGGLIVPSGLD-----VAASD-----SRPAGGVNITH-----VLADARGINVAASM-I EA-SGV---ADEFTAD---ER---GAG-ITVFVET : 201
OsaFLA1 : -----A-GCKQFARL-I VS-SGV---MKMYQA-----AMDKA-LTIFAPN : 33
OsaFLA5 : -----GPFHTFLDI-I EK-TDV---LRTFQS QANGS---KDG-ITVFVFK : 36
OsaFLA8 : -----GQFNTLIRL-I RS-TGA---AEQIDNQLNS---S-RNG-LTVFAPT : 36
OsaFLA27 : -----GPFHTFLNY-I EK-TNV---IETFQS QANKT---KEGVITFVFK : 36
OsaFLA26 : -----FNVAASM-I EA-SGV---ADEFEAD---ER---GAG-ITVFAPT : 32
OsaFLA7 : -----GOYTTFIRL-I KE-TQQ---DTQLNSQLNNSF-N-GNGY-TVFAPT : 38
OsaFLA14 : -----GPESTFLMY-I RQ-TNL---VAVFEHQAYRT---HQG-ITTFVFPV : 36
OsaFLA2 : -----LLEKA-GCKRFASL-I TS-TGV---LKT FED-----AMDKG-LTIFAPN : 37
OsaFLA11 : KSVKEIPYDISVLQVSSVLSSSEAE-----AP-----VPPAPVNLTE-----LLSKK-YCKSFAGL-I AANADV---FRAVNE-----TKDNG-LTTFCEV : 194
OsaFLA9 : -----GOETKFLQL-I QS-TQA---GEQINNQIKGKA-SSSGG-LTVFAPP : 39
OsaFLA3 : -----CKNFAGL-I ASNADV---YSNINA-----TKDNG-LTTFCEV : 32
OsaFLA18 : -----GSYTTFIRL-I KS-TQQ---DTQLNSQLNGT---STGF-TVFAPT : 36
OsaFLA13 : -----GPYGTFLGY-I TK-TGV---ITTFQS QANDTA-AGAPG-VTVFAPE : 39
OsaFLA15 : -----GHYNTFVRL-I KD-TEV---TSQVSSLLNNDR---NGDGLTVLAPT : 38
OsaFLA19 : -----GOYNTLLRL-I NA-TRV---GEQLGSQLKT---TYDGLTFEAPT : 36
OsaFLA10 : -----G-GCKAFADL-I AASPDA---SSTYQS---AAGGG-ITVCEPT : 34
OsaFLA6 : -----GKYTTFLRL-I HE-SRV---DTQINSQLMD---SYNG-LTMFAPT : 36
OsaFLA25 : -----PEFGLFSYL-I SK-THV---DRDINSR-----NTVTVLVED : 31
OsaFLA20 : -----SDESTFNHL-I TQ-TKL---ADEINRR-----QTITVLALD : 31
OsaFLA28 : -----: 96
PabFLA22 : -GIDRLLVPKSVQDDFNAWRRGVV-LAVKPEGAPVVTKLSTLAS---V-----NGRQS---PLVTAPVSYIAMAPGPSLA--PAPAPGPSSGRHWFDGESQVKDFIDT LSLFGGYSEMAD-I VNL-TSL---ASELAKLVS---EGYR-ITVLAPN : 255
PabFLA9 : -----TVLAPN : 6
PabFLA1 : -GVADLL-----: 93
PabFLA2 : -GVADLL-----: 93
PabFLA3 : -GVADLL-----: 93
PabFLA4 : -GVSGVL-----: 95
PabFLA17 : -GIDRMLIPKSVQDDFSKWRSGVS-LAVMPQGAPVLDPIKKLSKSA-A-----SSLSA---KSPPIHSIYYALAPGPSLA--PAPAPGPSTGHYWFDGESQVKDFINT LVLVLYGGYNEMAD-I VNL-TSL---ASELAKLVS---EGYK-VTVLAPN : 256
PabFLA15 : RLVKAFPNISIFISISTLLIPYGFD-----LSTSY---EPSDNAINVTE-----VLLKANNFNFVVS-M VA-SGI---TSDLESD---QA---GAG-ITIFAPT : 203
PabFLA5 : -----KNFNFVVS-M VA-SGM---TSELEFD---QA---GAG-ITIFAPT : 34
PabFLA20 : GLVDKFPYTISIARISAMIFPYGFD-----LSGSP---APT PVGINVTD-----VLVKAMNENFLVSL-I EA-SGV---VSEFESE---EA---GAG-ITIFAPS : 204
PabFLA21 : KSVKQEGYNISVIEVSKPITTNVE-----AP-----APAPADVNTA-----VLIKG-GCKIFAGM-I SA-TGV---VKTFKD-----AVQGG-LTVFAPT : 192
PabFLA16 : KSIKEDPYNMSVLEISNVIMPSDLS-----AP-----APSTNDLNITA-----LLEKA-GCKIFVQM-I TA-TGV---LQTYSD-----AVASG-LTILAPT : 193
PabFLA10 : -----GPFKTFRL-I EA-SDL---LTVLQAQANN---TEQG-ITIFAPS : 36
PabFLA6 : -----G-GCKIFAGL-I ST-TGV---IKSYDDSIKSSQDAVKKG-LTVFAPT : 40
PabFLA11 : -----I-I TA-TGV---LHTFQE-----IVDSG-LTIFAPV : 25
PabFLA18 : -GVDQPLPFLVLESSSSRRRKNYYS-SG---I-----APPPAG-----APALIPQSSSASP-GIDHPMNIIMPFMLEDAELSLRNQGY S I LALA-M RI-K-S---PEL-----L---RLQN-LTIFTLS : 228
PabFLA7 : -----: -
PabFLA19 : -GVDQFLVLESSSPASAPTSAPAAP-ASAP-A-----SAPAPA-----APTMLSPLPASP-GPDQPLNIILPFMLEDAMLSLRDRGY S I LALA-M RA-K-S---PEL-----L---RSQS-LAIFTLS : 214
PabFLA12 : -----GOEKTFLSL-I AG-TQA---ETQLQTQANN---TQQG-LTIFAPL : 36
PabFLA13 : -----: -
PabFLA8 : -----: -
PabFLA14 : -----GPFKTLNL-I EA-SDL---LTSIQSQANNTE-----: 27
PabFLA23 : -----TIFAPP : 6
PabFLA24 : -GISSVI-----: 91
PpaFLA10 : -GVDGLMVPKVASAFEWKRNKG-SGVNPHGSPVTLKRSRKSSAGAKSAPKARYMLERSAPAVPAALIHAVTAPA-PPATAPSLGPSLGPSIAPAPGPGTAMFNWDDDEMLQFVTALSNYGGYN DMAELL V NA-TTL---GVELGKLAR-----MGYK-LTILAPN : 276
PpaFLA11 : -GLDGFMI PPWNEKPRG-----SPVSRKVSRSRSGTKSASTTRYMLEKNAPVVPDALLRAVMPPT-TSVTAPSLGPSLGPSIAPAPGPGIAGFTWDDDEETLQFVMALTNYGGYN DMAELL V NA-TTL---GIEIGKLAR-----MGYK-ITILAPN : 263
PpaFLA6 : -GIDNVL-----: 94
PpaFLA7 : -GISAVM-----: 94
PpaFLA8 : -GISSVM-----: 94

```

[illegible]



|            |   |                                                                                                                                                                                                                                  |     |
|------------|---|----------------------------------------------------------------------------------------------------------------------------------------------------------------------------------------------------------------------------------|-----|
| BdiFLA11   | : | -----GPFHTFLSY- <b>IKQ-TNV</b> -----IETFQRQANKT---KEG <b>ITIFVPEK</b> :                                                                                                                                                          | 36  |
| BdiFLA3    | : | -----A-GCKQFAR <b>L</b> - <b>IVS-SGV</b> -----IKTYQA-----AMDKG <b>LTILFAPN</b> :                                                                                                                                                 | 33  |
| BdiFLA12   | : | -----GPFHTFLDY- <b>IEK-TDV</b> -----LKTFSKANDTK-ESAEG <b>ITIFVPEK</b> :                                                                                                                                                          | 39  |
| BdiFLA8    | : | -----GQYTTFIR <b>L</b> - <b>NKE-TQQ</b> -----DTQLNSQLNNSF-N-GNGY <b>TVVFAPT</b> :                                                                                                                                                | 38  |
| BdiFLA13   | : | -----GQYTKFM <b>R</b> <b>L</b> - <b>NKS-TQQ</b> -----DTQLNSQLNGS---DTGF <b>TVVFAPT</b> :                                                                                                                                         | 36  |
| BdiFLA4    | : | -----GRFQTFVMY- <b>IQQ-TGL</b> -----VEVFEIQAHRT---HHG <b>ITILVET</b> :                                                                                                                                                           | 36  |
| BdiFLA14   | : | -----GQFTKFLQ <b>L</b> - <b>IQS-TQE</b> -----DSQIDNQLKGKS--SSGG <b>LTVFAPP</b> :                                                                                                                                                 | 38  |
| BdiFLA15   | : | -----KAGQFNTFIR <b>L</b> - <b>IRS-TGV</b> -----AAQIDNQLNS--SQTGG <b>LTVFAPT</b> :                                                                                                                                                | 39  |
| BdiFLA16   | : | -----GPYGTFLDY- <b>ITK-TDV</b> -----IKTFQSQANDTEEQGGHG <b>ITVFAPQ</b> :                                                                                                                                                          | 40  |
| BdiFLA17   | : | -----G-GCKAFA <b>A</b> <b>L</b> - <b>ISASPDA</b> -----SSTFQS-----AIDGG <b>VTAFCE</b> <b>S</b> :                                                                                                                                  | 34  |
| BdiFLA21.1 | : | -----PEF <b>S</b> VYSGL- <b>IRE-TGL</b> -----ASILDGR-----RV <b>VTVLAPN</b> :                                                                                                                                                     | 31  |
| BdiFLA21.2 | : | -----PDLTAFNS <b>L</b> - <b>ITD-SGL</b> -----ARAINAR-----PT <b>VTVLATN</b> :                                                                                                                                                     | 31  |
| BdiFLA5    | : | -----A-GCKRFA <b>A</b> <b>L</b> - <b>VAGNPGV</b> -----LKAYQA-----AMATG <b>LTLFAPN</b> :                                                                                                                                          | 34  |
| BdiFLA18   | : | -----G-GCKAFAD <b>L</b> - <b>IAASPDA</b> -----ASTYQS-----AADGG <b>VTVFCE</b> <b>S</b> :                                                                                                                                          | 34  |
| BdiFLA6    | : | -----ANFTDFSS <b>A</b> - <b>IAS-ANI</b> -----TAQIDGR-----TP <b>ITILAVD</b> :                                                                                                                                                     | 31  |
| BdiFLA19   | : | -----PDFTLFNY <b>L</b> - <b>ITK-TKV</b> -----SAQINRR-----GT <b>ITILAPV</b> :                                                                                                                                                     | 31  |
| BdiFLA7    | : | -----PEFKTFNS <b>L</b> - <b>ISK-TKV</b> -----AEEINAR-----QDA <b>ITVLVVD</b> :                                                                                                                                                    | 32  |
| MpoFLA6    | : | STVFLQPSDVSVIMIDRTLQPVGFE-----TPRGA-----ANITG-----TLQDLGGY <b>S</b> IFV <b>S</b> <b>L</b> - <b>ITQ-TGV</b> -----DVVF <b>GGR</b> ---QS---GEG <b>ITIFVET</b> :                                                                     | 195 |
| MpoFLA1    | : | -----GQLSSLKM <b>V</b> - <b>VDA-AGL</b> -----ADTFDD-----SALN <b>VTVFAPN</b> :                                                                                                                                                    | 32  |
| MpoFLA14   | : | -GVEEMLIPNSVMQ <b>E</b> YVAHTTRKM-ATPLPTGAPGLDTRRAQLLEKQ-----FSAVEAKLVVAAASPSLP--PALALAPSIAPAPGPAMGPSTAPWLGFGDDEVTTFISAMLRFGG <b>Y</b> SEFAG <b>L</b> <b>L</b> - <b>DL-TSL</b> -----GSE <b>I</b> SKLVN-----MGYK <b>LTILAPD</b> : | 258 |
| MpoFLA4    | : | -GVES <b>L</b> -----                                                                                                                                                                                                             | 96  |
| MpoFLA7    | : | GTVLEDPYDIS <b>I</b> IEIDQVLKPAGFD-----AVEGD-----LVT-----VLESFQ <b>T</b> FSLFIS <b>Y</b> - <b>IKA-TGV</b> -----DGV <b>LATR</b> ---QT---SGG <b>LTVFAPR</b> :                                                                      | 193 |
| MpoFLA2    | : | -----PDL <b>S</b> LLGQ <b>V</b> - <b>VQA-AGL</b> -----TETLSD-----PTLE <b>VTVFAPN</b> :                                                                                                                                           | 32  |
| MpoFLA3    | : | -----PDL <b>S</b> LLGQ <b>V</b> - <b>VQA-AGL</b> -----TETLSD-----PTLE <b>VTVFAPN</b> :                                                                                                                                           | 32  |
| MpoFLA5    | : | -GINSV <b>L</b> N-----                                                                                                                                                                                                           | 93  |
| MpoFLA8    | : | AGVQKSPFDV <b>S</b> IIIEIDQVLLPVGFN-----NASGD-----LIA-----VLDSFQ <b>E</b> FTLLIS <b>Y</b> - <b>IQE-TKV</b> -----DAVFAEK---Q---AEG <b>ITIFAPR</b> :                                                                               | 192 |
| MpoFLA9/10 | : | TNITNEAFDIS <b>I</b> IQINSILTPVGFN-----TATGD-----LIK-----VLETFKD <b>Y</b> TMFIS <b>L</b> - <b>IKD-SGV</b> -----DSIFAGR---QT---GGG <b>ITVFAPT</b> :                                                                               | 193 |
| MpoFLA11   | : | ANITHEAFEISV <b>I</b> QISSILTPVGFN-----SATGD-----LIQ-----VLTKFN <b>V</b> YTMFIS <b>L</b> - <b>IKE-SAV</b> -----DSIFAGR---QT---GGG <b>ITVFAPT</b> :                                                                               | 193 |
| MpoFLA12   | : | ANITHEAFEISV <b>I</b> QISSILTPVGFN-----SATGD-----LIQ-----VLTKFN <b>V</b> YTMFIS <b>L</b> - <b>IKE-SAV</b> -----DSIFAGR---QT---GGG <b>ITVFAPT</b> :                                                                               | 193 |
| MpoFLA13   | : | SSIASIPYN <b>S</b> I-----VQCDKVLVPPPGFGTRATDNAN---ITA-----ALEAGLN <b>Y</b> NTFIQ <b>L</b> - <b>IQS-TGI</b> -----DAEFAAK---Q---TGTG <b>ITIFAPT</b> :                                                                              | 196 |
| CcrFLA1.1  | : | -----DQFSVLALAA <b>V</b> -PDL-----TEALGD-----PNRR <b>LTVFAPT</b> :                                                                                                                                                               | 33  |
| CcrFLA1.2  | : | -----DS <b>E</b> GILARAVGT <b>V</b> -DSL-----VKALDD-----PNSRF <b>TVFAPT</b> :                                                                                                                                                    | 33  |
| CcrFLA1.3  | : | -----I-----VEVLGN-----PGSR <b>LTVFAPT</b> :                                                                                                                                                                                      | 18  |
| CcrFLA1.4  | : | -----VEVLGN-----PGSR <b>LTVFAPT</b> :                                                                                                                                                                                            | 17  |
| CbrFLA1    | : | -----PRF <b>S</b> IFV <b>G</b> <b>L</b> - <b>IDK-G-F</b> -----AANLPL-----QP <b>LTISVE</b> <b>E</b> :                                                                                                                             | 29  |
| CbrFLA2    | : | -----QFSMFY <b>K</b> <b>A</b> - <b>IVD-TTE</b> -----IWNVEGR-TVL---VGEQ <b>LILFAPT</b> :                                                                                                                                          | 35  |
| CbrFLA3    | : | -----PEFQRFY <b>E</b> <b>A</b> - <b>INM-SRS</b> -----IDMVKGL---V---N-SG <b>VTILFAPV</b> :                                                                                                                                        | 33  |
| CbrFLA4    | : | -----DGAT <b>A</b> YANFVEAA <b>T</b> -RGA-----TV <b>S</b> ILL-----DDSN <b>VTVFAP</b> <b>I</b> :                                                                                                                                  | 36  |
| CbrFLA7    | : | -----GDLSMF <b>S</b> NA- <b>IMA-SRI</b> -----NLTLSGI---V---GGGR <b>VTVFAPN</b> :                                                                                                                                                 | 34  |
| CbrFLA9    | : | -----GDLSMF <b>S</b> NA- <b>IMA-SRI</b> -----NLT <b>L</b> IGI---I---GGGK <b>VTVFAPN</b> :                                                                                                                                        | 34  |
| CbrFLA11   | : | -----GLTTFV <b>S</b> <b>L</b> - <b>IKL-AKV</b> -----DE <b>S</b> IKGI---A---ATGP <b>VTVFAPS</b> :                                                                                                                                 | 33  |
| CbrFLA15   | : | -----KNLTL <b>Y</b> VGALRSS-RGALMAMEAQRRR-----PGG <b>VTIFAPT</b> :                                                                                                                                                               | 36  |
| CbrFLA16.1 | : | -----Q <b>Y</b> STLV <b>S</b> <b>L</b> IT---KAN-----LTVSLD-----TTSP <b>LTVFAPT</b> :                                                                                                                                             | 30  |
| CbrFLA16.2 | : | -----                                                                                                                                                                                                                            | 6   |
| CbrFLA16.3 | : | -----                                                                                                                                                                                                                            | 6   |
| CbrFLA16.4 | : | -----SNYTQ <b>I</b> AF <b>L</b> V-RR <b>V</b> -----GPTYLG-----ELTNN <b>TLFAPS</b> :                                                                                                                                              | 30  |
| CbrFLA19   | : | -----PDLTMF <b>V</b> QA- <b>ILV-SDT</b> -----FHVAISR---A---NGGG <b>VTVLAPN</b> :                                                                                                                                                 | 34  |
| CbrFLA20.1 | : | -----D <b>Y</b> VN-----TLRN <b>VTFLAPV</b> :                                                                                                                                                                                     | 15  |
| CbrFLA22   | : | -----LKKFY <b>Y</b> <b>A</b> - <b>IQI-SRI</b> -----ELR <b>I</b> RDS---A---NRGP <b>ITVFAPT</b> :                                                                                                                                  | 32  |
| CbrFLA23   | : | -----LKKFY <b>Y</b> <b>A</b> - <b>IQI-SRV</b> -----ESRLRDS---V---NQGP <b>ITVFAPT</b> :                                                                                                                                           | 31  |
| CbrFLA24   | : | -----LKKFY <b>Y</b> <b>A</b> - <b>IQI-SRV</b> -----ESRLRDS---V---NQGP <b>ITVFAPT</b> :                                                                                                                                           | 31  |

[illegible]

|       |   |           |      |      |      |      |      |      |      |      |      |      |      |      |      |      |      |      |      |      |      |      |      |      |      |      |      |      |      |      |      |      |      |      |      |      |      |      |      |      |      |      |      |      |      |      |      |      |      |      |      |      |      |      |      |      |      |      |      |      |      |      |      |      |      |      |      |      |      |      |      |      |      |      |      |      |      |      |      |      |      |      |      |      |      |      |      |      |      |      |      |      |      |      |      |      |      |      |      |      |      |      |      |      |      |      |      |      |      |      |      |      |      |      |      |      |      |      |      |      |      |      |      |      |      |      |      |      |      |      |      |      |      |      |      |      |      |      |      |      |      |      |      |      |      |      |      |      |      |      |      |      |      |      |      |      |      |      |      |      |      |      |      |      |      |      |      |      |      |      |      |      |      |      |      |      |      |      |      |      |      |      |      |      |      |      |      |      |      |      |      |      |      |      |      |      |      |      |      |      |      |      |      |      |      |      |      |      |      |      |      |      |      |      |      |      |      |      |      |      |      |      |      |      |      |      |      |      |      |      |      |      |      |      |      |      |      |      |      |      |      |      |      |      |      |      |      |      |      |      |      |      |      |      |      |      |      |      |      |      |      |      |      |      |      |      |      |      |      |      |      |      |      |      |      |      |      |      |      |      |      |      |      |      |      |      |      |      |      |      |      |      |      |      |      |      |      |      |      |      |      |      |      |      |      |      |      |      |      |      |      |      |      |      |      |      |      |      |      |      |      |      |      |      |      |      |      |      |      |      |      |      |      |      |      |      |      |      |      |      |      |      |      |      |      |      |      |      |      |      |      |      |      |      |      |      |      |      |      |      |      |      |      |      |      |      |      |      |      |      |      |      |      |      |      |      |      |      |      |      |      |      |      |      |      |      |      |      |      |      |      |      |      |      |      |      |      |      |      |      |      |      |      |      |      |      |      |      |      |      |      |      |      |      |      |      |      |      |      |      |      |      |      |      |      |      |      |      |      |      |      |      |      |      |      |      |      |      |      |      |      |      |      |      |      |      |      |      |      |      |      |      |      |      |      |      |      |      |      |      |      |      |      |      |      |      |      |      |      |      |      |      |      |      |      |      |      |      |      |      |      |      |      |      |      |      |      |      |      |      |      |      |      |      |      |      |      |      |      |      |      |      |      |      |      |      |      |      |      |      |      |      |      |      |      |      |      |      |      |      |      |      |      |      |      |      |      |      |      |      |      |      |      |      |      |      |      |      |      |      |      |      |      |      |      |      |      |      |      |      |      |      |      |      |      |      |      |      |      |      |      |      |      |      |      |      |      |      |      |      |      |      |      |      |      |      |      |      |      |      |      |      |      |      |      |      |      |      |      |      |      |      |      |      |      |      |      |      |      |      |      |      |      |      |      |      |      |      |      |      |      |      |      |      |      |      |      |      |      |      |      |      |      |      |      |      |      |      |      |      |      |      |      |      |      |      |      |      |      |      |      |      |      |      |      |      |      |      |      |      |      |      |      |      |      |      |      |      |      |      |      |      |      |      |      |      |      |      |      |      |      |      |      |      |      |      |      |      |      |      |      |      |      |      |      |      |      |      |      |      |      |      |      |      |      |      |      |      |      |      |      |      |      |      |      |      |      |      |      |      |      |      |      |      |      |      |      |      |      |      |      |      |      |      |      |      |      |      |      |      |      |      |      |      |      |      |      |      |      |      |      |      |      |      |      |      |      |      |      |      |      |      |      |      |      |      |      |      |      |      |      |      |      |      |      |      |      |      |      |      |      |      |      |      |      |      |      |      |      |      |      |      |      |      |      |      |      |      |      |      |      |      |      |      |      |      |      |      |      |      |      |      |      |      |      |      |      |      |      |      |      |      |      |      |      |      |      |      |      |      |      |      |      |      |      |      |      |      |      |      |      |      |      |      |      |      |      |      |      |      |      |      |      |      |      |      |      |      |      |      |      |      |      |      |      |      |      |      |      |      |      |      |      |      |      |      |      |      |      |      |      |      |      |      |      |      |      |      |      |      |      |      |      |      |      |      |      |      |      |      |      |      |      |      |      |      |      |      |      |      |      |      |      |      |      |      |      |      |      |      |      |      |      |      |      |      |      |      |      |      |      |      |      |      |      |      |      |      |      |      |      |      |      |      |      |      |      |      |      |      |      |      |      |      |      |      |      |      |      |      |      |      |      |      |      |      |      |      |      |      |      |      |      |      |      |      |      |      |      |      |      |      |      |      |      |      |      |      |      |      |      |      |      |      |      |      |      |      |      |      |      |      |      |      |      |      |      |      |      |      |      |      |      |      |      |      |      |      |      |      |      |      |      |      |      |      |      |      |      |      |      |      |      |      |      |      |      |      |      |      |      |      |      |      |      |      |      |      |      |      |      |      |      |      |      |      |      |      |      |      |      |      |      |      |      |      |      |      |      |      |      |      |      |      |      |      |      |  |
|-------|---|-----------|------|------|------|------|------|------|------|------|------|------|------|------|------|------|------|------|------|------|------|------|------|------|------|------|------|------|------|------|------|------|------|------|------|------|------|------|------|------|------|------|------|------|------|------|------|------|------|------|------|------|------|------|------|------|------|------|------|------|------|------|------|------|------|------|------|------|------|------|------|------|------|------|------|------|------|------|------|------|------|------|------|------|------|------|------|------|------|------|------|------|------|------|------|------|------|------|------|------|------|------|------|------|------|------|------|------|------|------|------|------|------|------|------|------|------|------|------|------|------|------|------|------|------|------|------|------|------|------|------|------|------|------|------|------|------|------|------|------|------|------|------|------|------|------|------|------|------|------|------|------|------|------|------|------|------|------|------|------|------|------|------|------|------|------|------|------|------|------|------|------|------|------|------|------|------|------|------|------|------|------|------|------|------|------|------|------|------|------|------|------|------|------|------|------|------|------|------|------|------|------|------|------|------|------|------|------|------|------|------|------|------|------|------|------|------|------|------|------|------|------|------|------|------|------|------|------|------|------|------|------|------|------|------|------|------|------|------|------|------|------|------|------|------|------|------|------|------|------|------|------|------|------|------|------|------|------|------|------|------|------|------|------|------|------|------|------|------|------|------|------|------|------|------|------|------|------|------|------|------|------|------|------|------|------|------|------|------|------|------|------|------|------|------|------|------|------|------|------|------|------|------|------|------|------|------|------|------|------|------|------|------|------|------|------|------|------|------|------|------|------|------|------|------|------|------|------|------|------|------|------|------|------|------|------|------|------|------|------|------|------|------|------|------|------|------|------|------|------|------|------|------|------|------|------|------|------|------|------|------|------|------|------|------|------|------|------|------|------|------|------|------|------|------|------|------|------|------|------|------|------|------|------|------|------|------|------|------|------|------|------|------|------|------|------|------|------|------|------|------|------|------|------|------|------|------|------|------|------|------|------|------|------|------|------|------|------|------|------|------|------|------|------|------|------|------|------|------|------|------|------|------|------|------|------|------|------|------|------|------|------|------|------|------|------|------|------|------|------|------|------|------|------|------|------|------|------|------|------|------|------|------|------|------|------|------|------|------|------|------|------|------|------|------|------|------|------|------|------|------|------|------|------|------|------|------|------|------|------|------|------|------|------|------|------|------|------|------|------|------|------|------|------|------|------|------|------|------|------|------|------|------|------|------|------|------|------|------|------|------|------|------|------|------|------|------|------|------|------|------|------|------|------|------|------|------|------|------|------|------|------|------|------|------|------|------|------|------|------|------|------|------|------|------|------|------|------|------|------|------|------|------|------|------|------|------|------|------|------|------|------|------|------|------|------|------|------|------|------|------|------|------|------|------|------|------|------|------|------|------|------|------|------|------|------|------|------|------|------|------|------|------|------|------|------|------|------|------|------|------|------|------|------|------|------|------|------|------|------|------|------|------|------|------|------|------|------|------|------|------|------|------|------|------|------|------|------|------|------|------|------|------|------|------|------|------|------|------|------|------|------|------|------|------|------|------|------|------|------|------|------|------|------|------|------|------|------|------|------|------|------|------|------|------|------|------|------|------|------|------|------|------|------|------|------|------|------|------|------|------|------|------|------|------|------|------|------|------|------|------|------|------|------|------|------|------|------|------|------|------|------|------|------|------|------|------|------|------|------|------|------|------|------|------|------|------|------|------|------|------|------|------|------|------|------|------|------|------|------|------|------|------|------|------|------|------|------|------|------|------|------|------|------|------|------|------|------|------|------|------|------|------|------|------|------|------|------|------|------|------|------|------|------|------|------|------|------|------|------|------|------|------|------|------|------|------|------|------|------|------|------|------|------|------|------|------|------|------|------|------|------|------|------|------|------|------|------|------|------|------|------|------|------|------|------|------|------|------|------|------|------|------|------|------|------|------|------|------|------|------|------|------|------|------|------|------|------|------|------|------|------|------|------|------|------|------|------|------|------|------|------|------|------|------|------|------|------|------|------|------|------|------|------|------|------|------|------|------|------|------|------|------|------|------|------|------|------|------|------|------|------|------|------|------|------|------|------|------|------|------|------|------|------|------|------|------|------|------|------|------|------|------|------|------|------|------|------|------|------|------|------|------|------|------|------|------|------|------|------|------|------|------|------|------|------|------|------|------|------|------|------|------|------|------|------|------|------|------|------|------|------|------|------|------|------|------|------|------|------|------|------|------|------|------|------|------|------|------|------|------|------|------|------|------|------|------|------|------|------|------|------|------|------|------|------|------|------|------|------|------|------|------|------|------|------|------|------|------|------|------|------|------|------|------|------|------|------|------|------|------|------|------|------|------|------|------|------|------|------|------|------|------|------|------|------|------|------|------|------|------|------|------|------|------|------|------|------|------|------|------|------|------|------|------|------|------|------|------|------|------|------|------|------|------|------|------|------|------|------|------|------|------|------|------|------|------|------|------|------|------|------|------|------|------|------|------|--|
| FLA22 | : | DEAIPNPTT | ---- | ---- | ---- | ---- | ---- | ---- | ---- | ---- | ---- | ---- | ---- | ---- | ---- | ---- | ---- | ---- | ---- | ---- | ---- | ---- | ---- | ---- | ---- | ---- | ---- | ---- | ---- | ---- | ---- | ---- | ---- | ---- | ---- | ---- | ---- | ---- | ---- | ---- | ---- | ---- | ---- | ---- | ---- | ---- | ---- | ---- | ---- | ---- | ---- | ---- | ---- | ---- | ---- | ---- | ---- | ---- | ---- | ---- | ---- | ---- | ---- | ---- | ---- | ---- | ---- | ---- | ---- | ---- | ---- | ---- | ---- | ---- | ---- | ---- | ---- | ---- | ---- | ---- | ---- | ---- | ---- | ---- | ---- | ---- | ---- | ---- | ---- | ---- | ---- | ---- | ---- | ---- | ---- | ---- | ---- | ---- | ---- | ---- | ---- | ---- | ---- | ---- | ---- | ---- | ---- | ---- | ---- | ---- | ---- | ---- | ---- | ---- | ---- | ---- | ---- | ---- | ---- | ---- | ---- | ---- | ---- | ---- | ---- | ---- | ---- | ---- | ---- | ---- | ---- | ---- | ---- | ---- | ---- | ---- | ---- | ---- | ---- | ---- | ---- | ---- | ---- | ---- | ---- | ---- | ---- | ---- | ---- | ---- | ---- | ---- | ---- | ---- | ---- | ---- | ---- | ---- | ---- | ---- | ---- | ---- | ---- | ---- | ---- | ---- | ---- | ---- | ---- | ---- | ---- | ---- | ---- | ---- | ---- | ---- | ---- | ---- | ---- | ---- | ---- | ---- | ---- | ---- | ---- | ---- | ---- | ---- | ---- | ---- | ---- | ---- | ---- | ---- | ---- | ---- | ---- | ---- | ---- | ---- | ---- | ---- | ---- | ---- | ---- | ---- | ---- | ---- | ---- | ---- | ---- | ---- | ---- | ---- | ---- | ---- | ---- | ---- | ---- | ---- | ---- | ---- | ---- | ---- | ---- | ---- | ---- | ---- | ---- | ---- | ---- | ---- | ---- | ---- | ---- | ---- | ---- | ---- | ---- | ---- | ---- | ---- | ---- | ---- | ---- | ---- | ---- | ---- | ---- | ---- | ---- | ---- | ---- | ---- | ---- | ---- | ---- | ---- | ---- | ---- | ---- | ---- | ---- | ---- | ---- | ---- | ---- | ---- | ---- | ---- | ---- | ---- | ---- | ---- | ---- | ---- | ---- | ---- | ---- | ---- | ---- | ---- | ---- | ---- | ---- | ---- | ---- | ---- | ---- | ---- | ---- | ---- | ---- | ---- | ---- | ---- | ---- | ---- | ---- | ---- | ---- | ---- | ---- | ---- | ---- | ---- | ---- | ---- | ---- | ---- | ---- | ---- | ---- | ---- | ---- | ---- | ---- | ---- | ---- | ---- | ---- | ---- | ---- | ---- | ---- | ---- | ---- | ---- | ---- | ---- | ---- | ---- | ---- | ---- | ---- | ---- | ---- | ---- | ---- | ---- | ---- | ---- | ---- | ---- | ---- | ---- | ---- | ---- | ---- | ---- | ---- | ---- | ---- | ---- | ---- | ---- | ---- | ---- | ---- | ---- | ---- | ---- | ---- | ---- | ---- | ---- | ---- | ---- | ---- | ---- | ---- | ---- | ---- | ---- | ---- | ---- | ---- | ---- | ---- | ---- | ---- | ---- | ---- | ---- | ---- | ---- | ---- | ---- | ---- | ---- | ---- | ---- | ---- | ---- | ---- | ---- | ---- | ---- | ---- | ---- | ---- | ---- | ---- | ---- | ---- | ---- | ---- | ---- | ---- | ---- | ---- | ---- | ---- | ---- | ---- | ---- | ---- | ---- | ---- | ---- | ---- | ---- | ---- | ---- | ---- | ---- | ---- | ---- | ---- | ---- | ---- | ---- | ---- | ---- | ---- | ---- | ---- | ---- | ---- | ---- | ---- | ---- | ---- | ---- | ---- | ---- | ---- | ---- | ---- | ---- | ---- | ---- | ---- | ---- | ---- | ---- | ---- | ---- | ---- | ---- | ---- | ---- | ---- | ---- | ---- | ---- | ---- | ---- | ---- | ---- | ---- | ---- | ---- | ---- | ---- | ---- | ---- | ---- | ---- | ---- | ---- | ---- | ---- | ---- | ---- | ---- | ---- | ---- | ---- | ---- | ---- | ---- | ---- | ---- | ---- | ---- | ---- | ---- | ---- | ---- | ---- | ---- | ---- | ---- | ---- | ---- | ---- | ---- | ---- | ---- | ---- | ---- | ---- | ---- | ---- | ---- | ---- | ---- | ---- | ---- | ---- | ---- | ---- | ---- | ---- | ---- | ---- | ---- | ---- | ---- | ---- | ---- | ---- | ---- | ---- | ---- | ---- | ---- | ---- | ---- | ---- | ---- | ---- | ---- | ---- | ---- | ---- | ---- | ---- | ---- | ---- | ---- | ---- | ---- | ---- | ---- | ---- | ---- | ---- | ---- | ---- | ---- | ---- | ---- | ---- | ---- | ---- | ---- | ---- | ---- | ---- | ---- | ---- | ---- | ---- | ---- | ---- | ---- | ---- | ---- | ---- | ---- | ---- | ---- | ---- | ---- | ---- | ---- | ---- | ---- | ---- | ---- | ---- | ---- | ---- | ---- | ---- | ---- | ---- | ---- | ---- | ---- | ---- | ---- | ---- | ---- | ---- | ---- | ---- | ---- | ---- | ---- | ---- | ---- | ---- | ---- | ---- | ---- | ---- | ---- | ---- | ---- | ---- | ---- | ---- | ---- | ---- | ---- | ---- | ---- | ---- | ---- | ---- | ---- | ---- | ---- | ---- | ---- | ---- | ---- | ---- | ---- | ---- | ---- | ---- | ---- | ---- | ---- | ---- | ---- | ---- | ---- | ---- | ---- | ---- | ---- | ---- | ---- | ---- | ---- | ---- | ---- | ---- | ---- | ---- | ---- | ---- | ---- | ---- | ---- | ---- | ---- | ---- | ---- | ---- | ---- | ---- | ---- | ---- | ---- | ---- | ---- | ---- | ---- | ---- | ---- | ---- | ---- | ---- | ---- | ---- | ---- | ---- | ---- | ---- | ---- | ---- | ---- | ---- | ---- | ---- | ---- | ---- | ---- | ---- | ---- | ---- | ---- | ---- | ---- | ---- | ---- | ---- | ---- | ---- | ---- | ---- | ---- | ---- | ---- | ---- | ---- | ---- | ---- | ---- | ---- | ---- | ---- | ---- | ---- | ---- | ---- | ---- | ---- | ---- | ---- | ---- | ---- | ---- | ---- | ---- | ---- | ---- | ---- | ---- | ---- | ---- | ---- | ---- | ---- | ---- | ---- | ---- | ---- | ---- | ---- | ---- | ---- | ---- | ---- | ---- | ---- | ---- | ---- | ---- | ---- | ---- | ---- | ---- | ---- | ---- | ---- | ---- | ---- | ---- | ---- | ---- | ---- | ---- | ---- | ---- | ---- | ---- | ---- | ---- | ---- | ---- | ---- | ---- | ---- | ---- | ---- | ---- | ---- | ---- | ---- | ---- | ---- | ---- | ---- | ---- | ---- | ---- | ---- | ---- | ---- | ---- | ---- | ---- | ---- | ---- | ---- | ---- | ---- | ---- | ---- | ---- | ---- | ---- | ---- | ---- | ---- | ---- | ---- | ---- | ---- | ---- | ---- | ---- | ---- | ---- | ---- | ---- | ---- | ---- | ---- | ---- | ---- | ---- | ---- | ---- | ---- | ---- | ---- | ---- | ---- | ---- | ---- | ---- | ---- | ---- | ---- | ---- | ---- | ---- | ---- | ---- | ---- | ---- | ---- | ---- | ---- | ---- | ---- | ---- | ---- | ---- | ---- | ---- | ---- | ---- | ---- | ---- | ---- | ---- | ---- | ---- | ---- | ---- | ---- | ---- | ---- | ---- | ---- | ---- | ---- | ---- | ---- | ---- | ---- | ---- | ---- | ---- | ---- | ---- | ---- | ---- | ---- | ---- | ---- | ---- | ---- | ---- | ---- | ---- | ---- | ---- | ---- | ---- | ---- | ---- | ---- | ---- | ---- | ---- | ---- | ---- | ---- | ---- | ---- | ---- | ---- | ---- | ---- | ---- | ---- | ---- | ---- | ---- | ---- | ---- | ---- | ---- | ---- | ---- | ---- | ---- | ---- | ---- | ---- | ---- | ---- | ---- | ---- | ---- | ---- | ---- | ---- | ---- | ---- | ---- | ---- | ---- | ---- | ---- | ---- | ---- | ---- | ---- | ---- | ---- | ---- | ---- | ---- | ---- | ---- | ---- | ---- | ---- | ---- | ---- | ---- | ---- | ---- | ---- | ---- | ---- | ---- | ---- | ---- | ---- | ---- | ---- | ---- | ---- | ---- | ---- | ---- | ---- | ---- | ---- | ---- | ---- | ---- | ---- | ---- | ---- | ---- | ---- | ---- | ---- | ---- | ---- | ---- | ---- | ---- | ---- | ---- | ---- | ---- | ---- | ---- | ---- | ---- | ---- | ---- | ---- | ---- | ---- | ---- | ---- | ---- | ---- | ---- | ---- | ---- | ---- | ---- | ---- | ---- | ---- | ---- | ---- | ---- | ---- | ---- | ---- | ---- | ---- | ---- | ---- | ---- | ---- | ---- | ---- | ---- | ---- | ---- | ---- | ---- | ---- | ---- | ---- | ---- | ---- | ---- | ---- | ---- | ---- | ---- | ---- | ---- | ---- | ---- | ---- | ---- | ---- |  |
|-------|---|-----------|------|------|------|------|------|------|------|------|------|------|------|------|------|------|------|------|------|------|------|------|------|------|------|------|------|------|------|------|------|------|------|------|------|------|------|------|------|------|------|------|------|------|------|------|------|------|------|------|------|------|------|------|------|------|------|------|------|------|------|------|------|------|------|------|------|------|------|------|------|------|------|------|------|------|------|------|------|------|------|------|------|------|------|------|------|------|------|------|------|------|------|------|------|------|------|------|------|------|------|------|------|------|------|------|------|------|------|------|------|------|------|------|------|------|------|------|------|------|------|------|------|------|------|------|------|------|------|------|------|------|------|------|------|------|------|------|------|------|------|------|------|------|------|------|------|------|------|------|------|------|------|------|------|------|------|------|------|------|------|------|------|------|------|------|------|------|------|------|------|------|------|------|------|------|------|------|------|------|------|------|------|------|------|------|------|------|------|------|------|------|------|------|------|------|------|------|------|------|------|------|------|------|------|------|------|------|------|------|------|------|------|------|------|------|------|------|------|------|------|------|------|------|------|------|------|------|------|------|------|------|------|------|------|------|------|------|------|------|------|------|------|------|------|------|------|------|------|------|------|------|------|------|------|------|------|------|------|------|------|------|------|------|------|------|------|------|------|------|------|------|------|------|------|------|------|------|------|------|------|------|------|------|------|------|------|------|------|------|------|------|------|------|------|------|------|------|------|------|------|------|------|------|------|------|------|------|------|------|------|------|------|------|------|------|------|------|------|------|------|------|------|------|------|------|------|------|------|------|------|------|------|------|------|------|------|------|------|------|------|------|------|------|------|------|------|------|------|------|------|------|------|------|------|------|------|------|------|------|------|------|------|------|------|------|------|------|------|------|------|------|------|------|------|------|------|------|------|------|------|------|------|------|------|------|------|------|------|------|------|------|------|------|------|------|------|------|------|------|------|------|------|------|------|------|------|------|------|------|------|------|------|------|------|------|------|------|------|------|------|------|------|------|------|------|------|------|------|------|------|------|------|------|------|------|------|------|------|------|------|------|------|------|------|------|------|------|------|------|------|------|------|------|------|------|------|------|------|------|------|------|------|------|------|------|------|------|------|------|------|------|------|------|------|------|------|------|------|------|------|------|------|------|------|------|------|------|------|------|------|------|------|------|------|------|------|------|------|------|------|------|------|------|------|------|------|------|------|------|------|------|------|------|------|------|------|------|------|------|------|------|------|------|------|------|------|------|------|------|------|------|------|------|------|------|------|------|------|------|------|------|------|------|------|------|------|------|------|------|------|------|------|------|------|------|------|------|------|------|------|------|------|------|------|------|------|------|------|------|------|------|------|------|------|------|------|------|------|------|------|------|------|------|------|------|------|------|------|------|------|------|------|------|------|------|------|------|------|------|------|------|------|------|------|------|------|------|------|------|------|------|------|------|------|------|------|------|------|------|------|------|------|------|------|------|------|------|------|------|------|------|------|------|------|------|------|------|------|------|------|------|------|------|------|------|------|------|------|------|------|------|------|------|------|------|------|------|------|------|------|------|------|------|------|------|------|------|------|------|------|------|------|------|------|------|------|------|------|------|------|------|------|------|------|------|------|------|------|------|------|------|------|------|------|------|------|------|------|------|------|------|------|------|------|------|------|------|------|------|------|------|------|------|------|------|------|------|------|------|------|------|------|------|------|------|------|------|------|------|------|------|------|------|------|------|------|------|------|------|------|------|------|------|------|------|------|------|------|------|------|------|------|------|------|------|------|------|------|------|------|------|------|------|------|------|------|------|------|------|------|------|------|------|------|------|------|------|------|------|------|------|------|------|------|------|------|------|------|------|------|------|------|------|------|------|------|------|------|------|------|------|------|------|------|------|------|------|------|------|------|------|------|------|------|------|------|------|------|------|------|------|------|------|------|------|------|------|------|------|------|------|------|------|------|------|------|------|------|------|------|------|------|------|------|------|------|------|------|------|------|------|------|------|------|------|------|------|------|------|------|------|------|------|------|------|------|------|------|------|------|------|------|------|------|------|------|------|------|------|------|------|------|------|------|------|------|------|------|------|------|------|------|------|------|------|------|------|------|------|------|------|------|------|------|------|------|------|------|------|------|------|------|------|------|------|------|------|------|------|------|------|------|------|------|------|------|------|------|------|------|------|------|------|------|------|------|------|------|------|------|------|------|------|------|------|------|------|------|------|------|------|------|------|------|------|------|------|------|------|------|------|------|------|------|------|------|------|------|------|------|------|------|------|------|------|------|------|------|------|------|------|------|------|------|------|------|------|------|------|------|------|------|------|------|------|------|------|------|------|------|------|------|------|------|------|------|------|------|------|------|------|------|------|------|------|------|------|------|------|------|------|------|------|------|------|------|------|------|------|------|------|------|------|------|------|------|------|------|------|------|------|------|------|------|------|------|------|------|------|------|------|------|------|------|------|------|------|------|------|------|------|------|------|------|------|------|--|



Type 2

|            |   |                                                                                                                                                        |   |     |
|------------|---|--------------------------------------------------------------------------------------------------------------------------------------------------------|---|-----|
| PabFLA2    | : | -----                                                                                                                                                  | : | -   |
| PabFLA3    | : | -----                                                                                                                                                  | : | -   |
| PabFLA4    | : | -----                                                                                                                                                  | : | -   |
| PabFLA17   | : | DEIMG-ELTTEQ-----L-----SEPGAPEHINYYHITPEYQ-TEESLYN-----                                                                                                | : | 294 |
| PabFLA15   | : | DDAFSAL-PPDT-----LQGL-----TAENKAVVIKYHVLHSYY-PLGSLDSI-----VNPLQPTIATESM-GAGT-----YTLNIT-RV-----NGSV-AVDI-----GI-----VQ--A-SITQTVFD-QKPLAIFA-----       | : | 298 |
| PabFLA5    | : | DDSFASAL-PPHT-----LQGLTARNKALQGLTARNKAVVIKYHVLHSYY-PLGSLESI-----VNPVQPTIATESM-GAET-----YTLNIT-RV-----NGSV-AVDI-----GI-----VQ--A-SITQTVFD-QKPLAIFA----- | : | 139 |
| PabFLA20   | : | DDAFSAL-NPET-----LQGL-----TAEKKAVITKYHVLHSYY-PLGSLQTI-----VNPAQPTLATQAM-GAGS-----YTLNIT-RM-----DGMV-AVNT-----GI-----VQ--A-----                         | : | 283 |
| PabFLA21   | : | DASEFTGV-TSKL-----LSKL-----SSEDKVSLEFHALPMYS-PLGYLKTS-----NGP-ISIMATTGA-G--K-----YVMTAS-SS-----GDTVMLNT-----RI-----SK--A-TISDTLLD-DQPLAIFT-----        | : | 284 |
| PabFLA16   | : | DGAFTSGT-VMLK-----LKKL-----SSAQEVSLEYHAYPAYN-PVGTLKTT-----IAP-ISIATLATNGA-S--K-----YALSVS-SA-----GDTVILNT-----GL-----SK--S-TISSTILD-DQPVVYYT-----      | : | 285 |
| PabFLA10   | : | DTAFSSL-PKKL-----LANL-----TADEIKEVILAHCTSKFY-TLTDFQDFSNP-----ANIMATGSN--GGK--YNLNIT-GDG-----G--TVTVSS-----GY-----VT--T-PITSTVHV-TDPLAITY-----          | : | 129 |
| PabFLA6    | : | DGAFTDV-IKKL-----LKKL-----SSEDKVSLLKFHAVPSYT-PLGTLKNT-----NGP-VTMMAS-----N--YAVTVS-SS-----GNTVTLNT-----SL-----SK--A-TISSTLLD-NLPLAIFT-----             | : | 128 |
| PabFLA11   | : | DGAFTDSV-MT-E-----IKKL-----SRAQQVSTIEYHARPVYS-PLGTLKTT-----DGDVVTIMATNGA-E--R-----YSLTVG-VN-----GDNVILGT-----GV-----NS--A-VITSTLLD-DQPLVYFS-----       | : | 117 |
| PabFLA18   | : | DDSVFLKG-----GQDFTNTVRYHVPNRRLLLADLVRLP--AGTRLHTLL--H--GQS-----LLVTDN-----KPFISI-----N-----H--VGVKIPDAFT-NRWIAVHE-----                                 | : | 307 |
| PabFLA7    | : | -----                                                                                                                                                  | : | -   |
| PabFLA19   | : | DDSVFLKD-----GQDFVDNVTYHVPNRRLLLADLMHLP--AGTVLHTLL--D--GQS-----LVVTNS-----KPFISV-----N-----H--VGVKIPDAFT-NRWIAV-----                                   | : | 291 |
| PabFLA12   | : | DGAFTSSL-RPQY-----KAML-----SKLTDDQ-----APTLSNP-----LSTIM-----GS-----YKFNVS-AFG-----AQVNVST-----GL-----VN--A-PLTSSIFS-QAPVAIYE-----                     | : | 107 |
| PabFLA13   | : | -----                                                                                                                                                  | : | -   |
| PabFLA8    | : | -----VKNE-----LKKL-----SSEDKESLEFHALPIYS-PRTTLKFS-----KRP-IATIMASTGP-G--K-----YDIKVS-SA-----GDTVILNT-----GV-----DK--A-TITSTLLD-DVPMVILT-----           | : | 85  |
| PabFLA14   | : | -QERSVVGPL-----HSQV-----LPDEKKEVILAHCTPKFY-TLTDFQNF-----SNP-ANIMATGSN--GGK--YNLNIT-AM-----SGAVTVSS-----GY-----VS--T-AITGSVRV-TDPVAIYT-----             | : | 118 |
| PabFLA23   | : | CLALLPVVG-----SPALPHHVLCHVAAQR-LSYGDLVNKT---SSDRIPSLA--L--GHP-----IVVTTG-PLTN--QGTGKYVVVLN-----G-----R--ARVVSFDLYG-DANLIYHG-----                       | : | 94  |
| PabFLA24   | : | -----                                                                                                                                                  | : | -   |
| PpaFLA10   | : | DQAMQ-LLTTEQ-----L-----NQAM--EPLTYYHFSEYQ-TEESMYNAVKR-LGKQSYSTLR--H--PHK-----VVAS--E-----SDGTVKFGDGD-----DA--AHIFDHDIIYV-DGHIISIQGINR-----             | : | 369 |
| PpaFLA11   | : | DQAMQ-QLTIEQ-----L-----DMPM--EPLTYYHFSEYQ-TDESMYNAVKR-LGKQSYSTLR--H--PHK-----VIAS--E-----SDGTVKFGDGD-----GA--AHICDHDIIYV-EGHIISIQGINR-----             | : | 356 |
| PpaFLA6    | : | -----                                                                                                                                                  | : | -   |
| PpaFLA7    | : | -----                                                                                                                                                  | : | -   |
| PpaFLA8    | : | -----                                                                                                                                                  | : | -   |
| PpaFLA9    | : | -----                                                                                                                                                  | : | -   |
| PpaFLA1    | : | NNAFNGTGGLLSILA-----ANNLTLE---QVTAPGSNRAASTILYHIVPSPA-TAADLTDGQT-----LTTAL--G--K-A---YELTVD-KTA---TPT--VVVSFIGA-GS-----N--A-TVITADLR-VCNSVYHI-----     | : | 134 |
| PpaFLA2    | : | NNAFNGTNGLLSLLR-----QNNLNLIT---DVTAPGQNRAASTILYHIHAGPA-RAADLKNNQV-----LTTFL--G--P-N---YTLRVN-KQT---APT--LIVSFVGT-GS-----N--A-TVTAADVP-VCSSIVHV-----    | : | 134 |
| PpaFLA3    | : | NSVLDPFIAARR-----SFSTQMLADVIRYHVLQYL-DSAELRTQT--NNGGMFTTLYQTIG-RANEL-DGFVNIITVT-PS-----NAVA-----                                                       | : | 106 |
| PpaFLA4    | : | -----                                                                                                                                                  | : | -   |
| PpaFLA5    | : | NGAFGGYLGGHS-----TYTPQMVSDEVIKYHILSYF-DTETIKTVST--MNDGVVTTLYQSTG-RANGM-DGFVNIITVS-PT-----DGVVTI-----                                                   | : | 109 |
| PpaFLA12   | : | -----                                                                                                                                                  | : | -   |
| PtFLA1     | : | DEMA-KLTDDQ-----L-----SEPGAPEQTIYYHVIPEYQ-TEESMYNAVRR-FGKISYDTLR--L--PHK-----VLAE--E-----ADGSVKFGHTE-----NS--AYLFDPDIYT-DGRISVQG-----                  | : | 350 |
| PtFLA19    | : | DEMA-KLTDDQ-----L-----SEPGAPEQTIYYHVIPEYQ-TEESMYNAVRR-FGKISYDTLR--L--PHK-----VLAQ--E-----ADGSVKFGHAE-----NS--AYLFDPDIYT-DGRISVQG-----                  | : | 349 |
| PtFLA6     | : | DEMA-KLTDDQ-----L-----SEPGAPEQTIYYHIIPEYQ-TEESMYNAVRR-FGKIGYDTLR--L--PHK-----VAAQ--E-----ADGSVKFGSGD-----GS--AYLFDPDIYT-DGRISVQG-----                  | : | 354 |
| PtFLA8     | : | DEMA-KLTDDQ-----L-----SEPGAPEQTIYYHIIPEYQ-TEESMYNAVRR-FGKIGYDTLR--L--PHK-----VVAQ--E-----ADGSVKFGSGD-----GS--AYLFDPDIYT-DGRISVQG-----                  | : | 354 |
| PtFLA5     | : | DDPFKAF--FPK-----FKNL-----TASGKVSLEFFGVPIYQ-SLAMLKSN---NGI-MNTLATDGE-K--K-----FDFTVQ-ND-----GEDVTILKT---RS---IT--A-KIVGTLLID-EQPLAITY-----             | : | 286 |
| PtFLA22    | : | DDPFKAF--LPK-----FKNL-----TASGKESLLQFFGVPIYQ-SLAMLKSN---NGI-MNTLATNGD-K--K-----FDFTVQ-ND-----GEDVTILKT---RG---TT--A-KIVGTLLID-EQPLAITYS-----           | : | 286 |
| PtFLA42    | : | DQMDAYAK-----NVSDYSSIFRKHVVPGL-FPRQDLEGFN---DGTSLPTIFS--G--GFM-----INLTKS-----GDVLVL-----N-----G--VPVIFPDMYQ-SDWLIYHG-----                             | : | 252 |
| PtFLA51    | : | -----                                                                                                                                                  | : | -   |
| PtFLA52    | : | -----                                                                                                                                                  | : | -   |
| PtFLA37    | : | BSLLFSVDLAS-----TAPHYTKSIFLHVSPSR-LSTSDLRNLTAASGGTYIDSILV--P--NHR-----LLITNS-LAQL--NGTVDGSILV-----N-----R--VRVSVPDLLFL-GSDIAVHG-----                   | : | 100 |
| PtFLA17    | : | DEAFKAA-GVPD-----LSKL-----TNAEIVSLIQYHATATYS-PFGSLKTS-----KDP-ISIILASNGA-G--K-----FDLTVT-SA-----GDSVTLHT-----GI-----GP--S-RVAETVLD-STPLVIFT-----       | : | 125 |
| PtFLA53    | : | -----                                                                                                                                                  | : | -   |
| PtFLA41    | : | -----                                                                                                                                                  | : | -   |
| PtFLA38    | : | DSAFSDL-SATA-----ISLQSLPADKKADVIFKHVLSHSYY-PLGSLESI-----VNPVQPTIATEDM-GAGS-----FTLNIS-RV-----NGSV-AIDS-----GI-----VQ--A-SVITQTVFD-QNPVVIFG-----        | : | 300 |
| PtFLA30    | : | DSAFSDL-SETD-----VSLQSLPADKKADVIFKHVLSHSYY-PLGSLESI-----VNPVQPTIATEDM-GAGS-----FTLNIS-RA-----NGSV-AIDS-----GI-----VL--A-SVITQTVFD-QNPVAFG-----         | : | 300 |
| PtFLA20    | : | DSAFSAL-KTGT-----LRTL-----TDQEKVELMQFHIVPMFI-SSSQFDTVSSP-----LKTHA-GSG---AR-----FQLNVT-ASG-----N--SLNIST-----GL-----TN--T-TISDTVYT-DTHLAIFY-----       | : | 127 |
| PtFLA23    | : | DNAFSSL-KSGT-----LNSL-----NDQEKAEVLQFHIIPOYL-SSSQFQTVSNP-----LTTQA-GSG---GR-----LELNVT-TTG-----N--SVNITT-----GL-----TN--T-SVSGTIYT-DNQLAIFY-----       | : | 127 |
| PtFLA18    | : | DDAFKNL-KKAS-----LSNL-----TQDQLKQLILFHALPHYYSLSDFKNLSQV-----S-PVSTFAG--AGG---YALNFT-DTS---G--TVHLDG---GW---SK--T-KVSSSVHS-TDPVAIFY-----                | : | 128 |
| PtFLA10    | : | DNAFSSL-KSGT-----LNSL-----SDQEKAEVLQFHIIPOFL-SSSQFQTVSNP-----LTTQA-GSG---GR-----LELNVT-TTG-----N--SVNITT-----GL-----TN--T-SVSGTIYT-DNQLAIFY-----       | : | 127 |
| PtFLA16    | : | DPVINGF--MPK-----YKNL-----TAPQKVSLLLYHGPIYQ-SLQMLKTS-----NGI-MNTLATNGA-N--K-----YDFTVQ-ND-----GEVVTLET---KV---TT--A-TITGTVKD-EEPLVYK-----              | : | 284 |
| PtFLA34    | : | DSAFSNL-KAGF-----LNL-----SDEDKTELVKFHVLPALI-SSSQFQTVSNP-----VRTQA-GTG---PR-----VTLNVT-TTG-----N--FVNITT-----GL-----TN--T-SISGTVYT-DSQFAIFY-----        | : | 127 |
| PtFLA9     | : | DNSFANL-KAGT-----LNSL-----SDQQKVQLVQFHILPNFL-SMSNFQTVSNP-----LRTQAGNSA--DGE---FPLNVT-TSG-----N--QVNITT-----GV---NT--A-TVANTIYT-DGQLVIFY-----           | : | 129 |
| PtFLA12    | : | DDAFKNL-KKPS-----LSNL-----TQDQVKQLILFHALPHYYSALADFKNLSQV-----S-PVSTFAG--AGG---YALNFT-DVS-----G--TVHLDG---GW---SK--T-KVSSSVHS-TDPVAIFY-----             | : | 128 |
| PtFLA7     | : | DNAFTNL-KAGT-----LNSL-----SDQQKVQLVQFHILPNFF-SMSSFQTVSNP-----LRTQAGNSA--DGE---FPLNVT-TSG-----N--QVNITT-----GV---NT--A-TVANTIYT-DGQLVIFY-----           | : | 129 |
| PtFLA2     | : | DNAFSSL-KAGF-----LNSL-----SDEDKTELVKFHVLPALI-SSSQFQTVSNP-----VRTQA-GTG---PR-----VTLNVT-TTG-----N--FVNISS-----GL-----TN--T-SISGTVYT-DSQFAIFY-----       | : | 127 |
| PtFLA13    | : | DSAFSEL-KSGT-----LNTL-----SDGDKSELVKFHVVPTEFL-STSQFQTVSNP-----LGTWA-GTG---SR-----LPLNVT-SYP-----N--SVNITT-----GL-----TN--T-SISGTVYT-DNQLAIFY-----      | : | 127 |
| PtFLA47    | : | DSAFSEL-KSGT-----LNTL-----SDGDKSELVKFHVVPTEFL-STSQFQTVSNP-----LGTWA-GTG---SR-----LPLNVT-SYP-----N--SVNITT-----GL-----TN--T-SISGTVYT-DNQLAIFY-----      | : | 127 |
| PtFLA40    | : | DSAFSEL-KSGT-----LNTL-----SDGDKSELVKFHVVPTEFL-STSQFQTVSNP-----LGTWA-GTG---SR-----LPLNVT-SYP-----N--SVNITT-----GL-----TN--T-SISGTVYT-DNQLAIFY-----      | : | 127 |
| PtFLA28    | : | DSAFSEL-KSGT-----LNTL-----SDGDKSELVKFHVVPTEFL-STSQFQTVSNP-----LGTWA-GTG---NR-----LPLNVT-SYP-----N--SVNITT-----GL-----TN--T-SISGTVYT-DNQLAIFY-----      | : | 127 |
| PtFLA39    | : | DSAFSEL-KSGT-----LNTL-----SDGDKSELVKFHVVPTEFL-STSQFQTVSNP-----LGTWA-GTG---SR-----LPLNVT-SYP-----N--SVNITT-----GL-----TN--T-SISGTVYT-DNQLAIFY-----      | : | 127 |
| PtFLA50    | : | DSAFSEL-KSGT-----LNTL-----SDGDKSELVKFHVVPTEFL-STSQFQTVSNP-----LGTWA-GTG---SR-----LPLNVT-SYP-----N--SVNITT-----GL-----TN--T-SISGTVYT-DNQLAIFY-----      | : | 127 |
| PtFLA29    | : | DSAFSEL-KSGT-----LNTL-----SDGDKSELVKFHVVPTEFL-STSQFQTVSNP-----LGTWA-GTG---SR-----LPLNVT-SYP-----N--SVNITT-----GL-----TN--T-SISGTVYT-DNQLAIFY-----      | : | 127 |
| PtFLA32/49 | : | DSAFSEL-KSGT-----LNTL-----RDGDKSELVKFHVVPTEFL-STSQFQTVSNP-----LGTWA-GTG---SR-----LPLNVT-SYP-----N--SVNITT-----GL-----TN--T-SISGTVYT-DNQLAIFY-----      | : | 127 |
| PtFLA45    | : | DSAFSEL-KSGT-----LNTL-----SDGDKSELVKFHVVPTEFL-STSQFQTVSNP-----LGTWA-GTG---SR-----LPLNVT-SYP-----N--SVNITT-----GL-----TN--T-SISGTVYT-DNQLAIFY-----      | : | 127 |
| PtFLA35    | : | DSAFSEL-KSGT-----LNTL-----SDGDKSELVKFHVVPTEFL-STSQFQTVSNP-----LGTWA-GTG---SR-----LPLNVT-SYP-----N--SVNITT-----GL-----TN--T-SISGTVYT-DNQLAIFY-----      | : | 127 |
| PtFLA46    | : | DNAFSSL-VAGA-----VGS-----NDREKLEFVQFHILPRFL-SISDFQTLNPN-----VKTLA-GSD--RK-----FPLTIT-TSD-----N--SVTVSS-----GL-----TK--T-SISNTIYT-DKQVAIYE-----         | : | 127 |
| PtFLA3     | : | DNAFNNL-KAGA-----LNGL-----NQREQVQLIQYHTLPKFY-TMSNLLLVSNP-----VPTQASGQD--GV-----WGLNFT-GQ-----SNQVNVST-----GL-----VE--V-QINNALRQ-DSPLAIFY-----          | : | 128 |
| PtFLA15    | : | DNAFNNL-KSGA-----LNGL-----SQQQVQLIQYHMLPKFY-SLSNLLLVSNP-----VPTQASGQE--GV-----WGLNFT-GQ-----SNQVNVST-----GL-----VE--V-QINNALRQ-DFPLAIFY-----           | : | 128 |

## Type 2

|            |   |                                                                                                                                                     |       |
|------------|---|-----------------------------------------------------------------------------------------------------------------------------------------------------|-------|
| PtFLA14    | : | DSAFSEL-KSGT-----LNTI-----SDGDKSELVKFHVIPTEL-STSQLQTVSNP-----LGTWA-RTG---SR-----LPLNVT-SYP-----N--SVNITT---GL---TN--T-SISGTVYT-DNQLAIYK-----        | : 111 |
| PtFLA48    | : | DGAFSAIIKSGV-----LNSI-----TDHQKIELVQFHIIIPRIL-TTANFQTVSNP-----ITTILA-GSG---NR-----FALNVI-TTE-----N--MVNVTT---GL---TN--T-SVSAIVYT-DSQLAIYQ-----      | : 128 |
| PtFLA27    | : | DGAFSAIIKSGV-----LNSI-----SDHQKIELVQFHIIIPRIL-TTANFQTVSNP-----ITTILA-GSG---SR-----FALNVI-TTE-----N--MVNVTS---GL---TN--T-SVSAIVYT-DSQLAIYQ-----      | : 128 |
| PtFLA43    | : | DSAFSEL-KSGT-----LNTI-----SDGDKSQLVKFHVIPTEL-STSQFQTVVG-----YHLTSQ-SYT-----N--SVNITT---GL---TN--T-SISGTVYT-DNQLAIYK-----                            | : 116 |
| PtFLA33    | : | DSAFSEL-KSGT-----LNTI-----SDGDKSELVKFHVVPNSY-LLPSSR-----PLSGTVYT-DNQLAIYK-----                                                                      | : 91  |
| PtFLA21    | : | NGMNSPLS-----GKPNGEIKNVISGHVILDYY-DVAKLQKLQ---NKTAMLTITL-----                                                                                       | : 77  |
| PtFLA26    | : | NGSIDGLS-----GRPLDIAKRITSAHVILDYY-DQIKLSKLQ---KASTI-----                                                                                            | : 73  |
| PtFLA4     | : | ELEFVASS-----SPMLEKIVRLHIIPQR-ATYIELAALP---DKQRLRLTIL---P--DED---LKITKG-----VGVTQGLAI-----N-----G--VEIAAPEIFS-SKEFIIVHG-----                        | : 258 |
| PtFLA44    | : | EVSIF-SG-----SHGYISSVRFHIVPNHYLSTADLERLP---VGATLPITLE---R--GQA---LVVTSAGGLT--GFNTAVPMRI-----N-----Y--VRVKVPDVMR-NLKIVVHA-----                       | : 275 |
| PtFLA24    | : | -----                                                                                                                                               | : -   |
| SmoFLA1    | : | -----                                                                                                                                               | : -   |
| SmoFLA2    | : | -----                                                                                                                                               | : -   |
| SmoFLA3    | : | DHAMD-HLTTEQ-----I-----NAPGGLEAITMYHVITEYQ-TEESLYNAVRR-FEKVKFLTILW---Q--PHT-----IHAK--E-----TDGTVQFGEGE-----SG--ALLYDHDIFT-DGHISIQGISKVL---         | : 133 |
| SmoFLA6    | : | DDAFKAL-PPNA-----LAEL-----SQAQKIALIQFHAIATYF-TMGSLRSV---A-TPLPTVASSRI--GG-----FELNVS-TAG-----GKGVSVFVT---GL---NR--A-DVTDTELD-TPPVAVYA-----          | : 288 |
| SmoFLA7    | : | DEAFQGL-PNGT-----MAAL-----SPSQASSLMAYHTLPAYT-SSGSLQRQ---N-SLVQTVASNGD--NQK---FLIQVA-PSG---GNSGGVSLST---GV---DT--A-DVSTIYD-QPPTAAYS-----             | : 296 |
| SmoFLA8    | : | DSAFQNL-PSGS-----LAAL-----TQSQRQLIVRYHLPSFF-TFGSLRTL---K-APLITILATSN---RN---FEVNAS-GE-----GPSGGLAIAIAT---GV---ST--A-NVIATILLE-DDPVGVYA-----         | : 294 |
| SmoFLA9    | : | DRAVA-RLAAEH-----I-----GAIESITAYHIVAEYQ-TEESLYTL-----                                                                                               | : 281 |
| SmoFLA4    | : | NNTLLNDFIYDM-----GK-HPSEEKLADIVRYHISDFYI-ESEFLAVRR---NFSSPIKTLIFRERP-YEETLHFRWLQLNVND-NH-----GVATILSRPPHQSP---PL--ATILRNVVQE-PFSITIVYA-----         | : 138 |
| SmoFLA5    | : | DSVLDPIILDQLA-----Q-SVTGQQIADIVRYHVILEYE-GINDLRSLP---NKSCLFTTLFQTTG-RASNN-AGFVNITDD-PN-----GGVSVGWPPSSSTV---FS--SEILGTVKEL-PFNVSIVD-----            | : 136 |
| BdiFLA23   | : | DEAFMA-RLTTDQ-----I-----SEPGSPENIIVYHMIPEYQ-TEESMYNAVRR-FGKVRYDILR---L--PHK-----VVAR--E-----ADGSVKFGQGE-----GS--AYLFDPDIYT-DGRISVQG-----            | : 350 |
| BdiFLA22   | : | DEAFMA-RLTTDQ-----I-----SEPGSPENIIVYHMVPEYQ-TEESMYNAVRR-FGTVRYDILR---L--PQK-----VTAR--E-----ADGSVKFGHGE-----GS--AYLFDPDIYT-DGRISVQG-----            | : 351 |
| BdiFLA9    | : | DAFVASF--MPK-----YKNL-----TAKAKTATILYHAVPDYY-SLQLLTSN---SGK-VSTLATSSV-AKKD---YSFDVS-KD-----GETAALDT---KV---IT--A-SVTATVKD-DDPLAVYA-----             | : 99  |
| BdiFLA1    | : | DAAFEDL-PSGT-----MNGI-----SSQDQIQMMLYCVLPRFY-SLSMLGTLNGK---VSTQASGSD---GP---YEYKIK-PSG-----SNVNVST---GV---KGNNM-LISTIVSK-EFPLAVYS-----              | : 100 |
| BdiFLA2    | : | -----                                                                                                                                               | : -   |
| BdiFLA20   | : | DDAFAG-GLPD-----A-----AGRLQSLPADRKAVIVRFHVHSYY-PLGSLESI---VNPVQPTLATECT-EAGR---FTLNIT-RS-----NGSV-AIDT---GV---VQ--A-SITRTVFD-QNPVAVFA-----          | : 305 |
| BdiFLA10   | : | DDAFASL-PAG-----P-----GDRLQSLPAERKAVIVRYHVHSYY-PLGSLESI---VNPLQPTLATEFSSQAGR---FTLNIT-RA-----NGSV-AIDT---GV---VQ--A-TITRTVFD-QNPVAVFA-----          | : 132 |
| BdiFLA11   | : | DSAFALKKSTF-----SNL-----TSDQLKMLIMYHALPEFY-SLAQFRNL---S-V--LNPVN-TFA--GAP---YTLNLT-DD-----MGTISVKS---MW---SK--P-TISSSVYA-TDPVAVYS-----              | : 127 |
| BdiFLA3    | : | DDAFQAK-GLPD-----LSKL-----TSANLVTILEYHALPQYA-PKASLKT---KGG-IPTLASTGS-G--K---YDLSVV-TK-----GDDVSMAT---GM---DK--S-RVASTVLD-DTPVAVHT-----              | : 125 |
| BdiFLA12   | : | DSAFSSLRATTF-----ANL-----TGEELKSILVLYHALPKYY-SLAEFNKL---S-S--LNPVP-TFA--GSQ---YTLNLT-DN-----MGSIRVKS---MW---SN--P-KISSSVYS-TRPVAVYE-----            | : 130 |
| BdiFLA8    | : | DNAFNNL-KPGT-----LNSL-----TQQQVALVQGHVLPQFY-SMESFQTASNP---VRITQASGQD---GP---FTLNIT-ATA-----N-NQVNVSS--GV---SE--V-TVNNALSD-KKPLAVYS-----             | : 131 |
| BdiFLA13   | : | DNAFDSL-KAGT-----LNSL-----SQEQQVSLVQAHIIPAFF-SMESFETASNP---VRITQASGAD---GP---YTVNVT-ATS-----N-GQVNVST--GL---VS--T-MVGTALRK-EKPLAVYS-----            | : 129 |
| BdiFLA4    | : | DDAFAAIEPSVL-----SGL-----KKHQVKSIMYHALARHY-ALKEFDAL---S-R--VSPVT-TFA--GGL---YTVNVT-YD-----AGAIRVVS--SW---AD--A-KVVRPVYE-MPPMAVYE-----               | : 127 |
| BdiFLA14   | : | DNAFSAL-KSGT-----LNAL-----SDAQKTSILVQFHVSQLI-PM AQFDTASNP---LRITQAGETR--PGK---YPLNVT-ADG---Q--QVNIST--GV---VN--A-SVSGTVYT-GDRLVIVYQ-----            | : 131 |
| BdiFLA15   | : | DNAFTSL-ASGT-----LNSL-----SDSQKNSILVQFHVSTAV-PM SQFDTVSNP---LRITQAGESS--PGE---YPLNVT-ATG---Q--QVNIST--GV---VN--A-TVNTLFT-GDQLVIVYQ-----             | : 132 |
| BdiFLA16   | : | DSAFAAVDSAAL-----SNL-----TADRLRSLMLHHAAPKYY-PLSVFSAL---A---ASST-PVS--MFA---YSVNVT-DK-----AGKTGVVS--GW---AA--A-KLVSSVYS-TRPVAVYA-----                | : 129 |
| BdiFLA17   | : | DGAVKSF--LPR-----YKNL-----TAAGKAALILSHAVPVYY-TRALKSN---NGV-MNTLATDGG-A-GN---FNLTVQ-NV-----GDQVSVKT---AG-KGKGA--A-RVESTVYD-KEPVAVYG-----             | : 129 |
| BdiFLA21.1 | : | NTDIPKVIH-----TLPRPLLADILALHVIPDYLDPEKLDALRR--GRTG-----DGS-----                                                                                     | : 77  |
| BdiFLA21.2 | : | NTLADSLRGLR-----HLPEPALVDLIALHVLDYL-DPEKLDALRR--GRTG-----GGSIV-T-----GGSIV-T-----                                                                   | : 83  |
| BdiFLA5    | : | DDAFVAKAGTPD-----VGKM-----EKDDLVRILMYHAVPAYE-PKPSLKLKVA--GARP-LRITLASTAA-G--E---YNVTVV-AR-----GDDVSLDT---GV---RK--S-RVAATVLD-EVPLCVLT-----          | : 130 |
| BdiFLA18   | : | DAFVRAF--MPR-----YKNL-----TADGKASLILFHAVPVYY-SPGSLKSN---NGV-MNTLATDGA-S-KN---FNFTLQ-NE-----GEAVAIKT---GASPGGGV--A-RVEATVMD-RDPVAVYR-----            | : 130 |
| BdiFLA6    | : | NAAVAQLKA--R-----RLAPESLAHVILSLHVLDYF-DDARIRHL-----                                                                                                 | : 69  |
| BdiFLA19   | : | NADVDWLLRRSS-----RLPRAALVELLAVHVLDYI-DAAKL-----                                                                                                     | : 68  |
| BdiFLA7    | : | DKFAGAIT-----ALPADTQKKVIAVHVILDYY-----                                                                                                              | : 60  |
| MpoFLA6    | : | DEAFNKL-PGQW-----FEAF-----ELKEQKLILEYHALTRYN-SDLALWRY---RDKQVPTVSSTVQ--EGP---DAFNLL-VTA-----NKGLV-TIHSS-TPDK---PV--A-TLQSTLFD-ASPLVIVYS-----        | : 294 |
| MpoFLA1    | : | NAAIQGLV---NVLN-----ASGLTIA---NVTGN-NKAASIVLYHVATLVA-TSTQLVNDQS---LPTILY--G-GY-N---LTVDRN--A---T--NVEIDGGA-DT-----Q--A-TVVTDPDVR-VCGSVVHI-----      | : 128 |
| MpoFLA14   | : | DKAWSGALTEEH-----I-----SSQTALEDILHYHIITEYQ-TEESLYSTLRR-MGKTHFSTLR---V--PHK---LAAH--E---VDGQVVFEGED-----DA--AGVFDHDIIFA-DGRISIQGIDRVMIP--            | : 358 |
| MpoFLA4    | : | -----                                                                                                                                               | : -   |
| MpoFLA7    | : | DSAFNAL-KSGS-----IQTL-----SPGKQKLILQYHALTQYY-TMNFLSM---VDAPVQTVSSTVG--GGY---L-MNIT-SK-----ASTV-TIKT---GV---GN--A-TVGEVLYN-ANPVTIVYA-----            | : 286 |
| MpoFLA2    | : | NAAFEELL---QVLN-----SSGLTLD---DVTAPESNKAASILLYHVVPVAA-LSTQLSDMQV---LPTLL---GK-N---LTVSLM--G---G--MVNIIA-Q-ES-----N--A-TVVTADVT-VCGSVVHI-----        | : 127 |
| MpoFLA3    | : | NAAFEELL---QVLN-----SSGLTLD---DVTAPESNKAASILLYHVVPVAA-LSTQLSDMQV---LPTLL---GK-N---LTVSLM--G---G--MVNIIA-Q-ES-----N--A-TVVTADVT-VCGSVVHI-----        | : 127 |
| MpoFLA5    | : | -----                                                                                                                                               | : -   |
| MpoFLA8    | : | DSAFNSL-ATGS-----IQTL-----SLSEQKLILEYHALDGYE-SLDSLETM---LNKPTKTILASADA--AGY---I-LNVS-ATP-----GQSTV-RLRT---GV---SV--A-TVLEIITYD-ANPVTIVYA-----       | : 287 |
| MpoFLA9/10 | : | DSAFNGL-TSAS-----LQAL-----SVTDLKLILMQYHALTSYQ-PLDILQNM---VDSPVSTIASTIA--SGY---L-LNVS-SA-----VMTV-TLHT---GV---ND--A-KIETLYD-ARPVTIVFG-----           | : 286 |
| MpoFLA11   | : | DSAFNSL-ASGS-----IQGL-----SVSDLKLILMQYHALTSYQ-PLSVLQNM---VNSPVSTIASTIA--SGY---L-LNVS-SA-----AKTV-TLHT---GV---SV--A-TIQETLYD-ATPTTVFG-----           | : 286 |
| MpoFLA12   | : | DSAFNSL-ASGS-----IQGL-----SVSDLKLILMQYHALTSYQ-PLSVLQNM---VNSPVSTIASTIA--SGY---L-LNVS-SA-----AKTV-TLHT---GV---SV--A-TIQETLYD-ATPTTVFG-----           | : 286 |
| MpoFLA13   | : | DAAFAAPAGAL-----A-ALTPDQAKQVIRAHAVTYYY-PLGTLSTM-----AEIVQ---G--T-L---LRFRDG-----RVVDRDPS-RR-----N--P-RPDPRNVF-TQNGWVHV-----                         | : 237 |
| CcrFLA1.1  | : | NAAFAALTNKLSPGAGVDAADPEGILFALMGALPGP---LPGRSPGEVLTTILSYHLAFAA-PQLELNDGT---AEIVQ---G--D-A---LRFADG-----LVIDADES-RE-----N--P-VADPRNFF-PQNGWVHV-----   | : 144 |
| CcrFLA1.2  | : | DEAFALANQLVPGADLNPAKDCAVVEALVSAIAPLA---DVEAAANSTIESILGYHALPFAA-PQLELDMSS---AEIVQ---G--D-A---LRFADG-----LVIDADES-RE-----N--P-VADPRNFF-PQNGWVHV-----  | : 145 |
| CcrFLA1.3  | : | DEAFTNLANTLVPDANLEASDKDAVVEALVTAIAPLA---DVEAAGGATIESILLYHAGMAA-PLGKLEEMKT---AKTLQ---G--G-V---LSFNSG---SVTDDDP-RE-----D--A-VVDPRNIF-TQNGWVHV-----    | : 130 |
| CcrFLA1.4  | : | DEAFTNLANTLAPDANLEASDKDAVVEALVTAIAPLA---DVEAAGGATIESILLYHTLGEAS-PIQLEKSDT---LTTIQ---G--D-S---ISVADG-----KVTDGDDS-RD-----D--A-AISTPNIF-LQNGWVHV----- | : 129 |
| CbrFLA1    | : | NAAFARLPGQL-----DTIKADEALLYEFLGYHFADGEY-PKADLLAAT---AKSTSGTVSVPTQG-----GSYVSFSSV-GD-----V-IKVDGS--TSV---TE--A---DFLVDS-PNKAVAHV-----                | : 125 |
| CbrFLA2    | : | NAAFSTALSE--E-----VITCL---QKEPGA-TLASEFKY-----                                                                                                      | : 66  |
| CbrFLA3    | : | NGAFDALGAV-----YTECM---LKRPGMDDLPLIVRFHVAT-GNFVNAQLMTMSS---VQSFL---G-LP---IPLTH-AAAG-----GLVLD---G-----Q--ATVTGPDVKI-AVNATVHT-----                  | : 123 |
| CbrFLA4    | : | NSAFDKLGSSL-----VDCLLSDS-----SSGLLDIILLNHIFEGGH-PSKSLTD-GQK---LLTVA---N-TT---AEIAV---N--E---TGAF---IE---G--AKIVPDLFL-TGESAVHG-----                  | : 123 |
| CbrFLA7    | : | NGAFAMLSPE-----VKQCL---DTQSGKIDVLTQIMLFHLAVGGNYTAELKTISR---LTAAS--G-MP---IDLMT-LGDG---TIMVE---G-----T--ARVVPDAIT-GVNATVHI-----                      | : 125 |
| CbrFLA9    | : | NGAFAMLSPE-----VKQCL---DTQSGKIDVLTQIMLFHLAVGGNYTVaelKtISR---LTAAS--G-MP---IDLMT-LGDG---TIMVE---G-----T--ARVVPDAIT-GVNATVHI-----                     | : 125 |
| CbrFLA11   | : | EAFAVLSSAYPA-----QLACV---TTGGGIDNYLSQILKYHILPNGNFTASKLTKLTQ---VSTLI---G-LP---IQLEVTLPsg---PLKLD---M-----T--AEVVQADAI-F-ANGTVHV-----                 | : 128 |
| CbrFLA15   | : | DAFVSDQIQRLG-----GCLA---AIPDVADLVMTSSLLYSAVPGHL-PM AEIRSRLNQSNGLRLPTLY---P-PN-E---VAVSSA-TSR---YPSTKMGVFDGA-QI---F--P-SGGFDVVT-APDVVQM-----         | : 143 |
| CbrFLA16.1 | : | NDVIEALNVGD-----TKFLTDPK-----NVELLKRLVVFYHFNSKI-LAVNLTA-GRS---LRSLE---G-EN---LIVEV---E---D---GTTF---VQ---G--AGITAADDII-REDGVVHG-----                | : 117 |
| CbrFLA16.2 | : | NQGMSSSVE-M-----AQLLTNA---TARNDILLYHLAGRY-TFSWLKEHPGV---YDNFT---G-FE---I--VV--SGG---G---TEFVGNA-AS-----L--GQIVTPDLIA-NPKIVVHG-----                  | : 94  |
| CbrFLA16.3 | : | NEAITNFMLAY-----AALLSDN---AKLDEVIKFHVINGSY-SALFLRTNPGD---YGG-----N---F--SVV-VQ---G---DSLRVGYs-LA-----L--GSVVAPDLIA-TSSITVHG-----                    | : 91  |

Type 2

CbrFLA16.4 : NEATITNFMVAN-----AAI LGDR-----AKLDEVIK FHV L NGSY-TASF LRKNPGD-----YGG-----N-----F--SVD-VQW---D----NSLMVGYS-SA-----R--GLV VAPDIYA-TSKIT L HG----- : 116  
CbrFLA19 : NTAFSVFDPA-----VLDCL-----YSKPASLNVLSQITKYHI L V-GNHNATELIAMQT-----VHADS---G-LP-----LHFNL-TSRG-----RVRISDDD-GG-----E--AFMTRPDFRL-LINST L HV----- : 128  
CbrFLA20.1 : NSAWDFLDPAM-----KDCI MAGD-----KLVDV VVKSH L I GKL-TAEMISNVPR-----VENI Y--R-FW-----L--NVT-TDD---I----TNLT---S-VN-----N--VEI I RPD VYM-FPTKV L HG----- : 102  
CbrFLA22 : DDSITKLDPE-----LWTCV-----TTGQGPLDILSQITLYHF V TDGNFTAAEVATKRH-----LTSAS---G-MP-----LG V KV-V-NG-----NVMLE---D-----Y--API TEPNALR-TSNAT V HL----- : 122  
CbrFLA23 : DDSFMKLDPE-----LWRCA-----TTGQGPLDVLSQITMLYHF V TSGNFTAAEVATKTQ-----LTSAS---G-MP-----IDVKD-V-NG-----NVVLE---G-----Y--ASITGPDALK-SPNAT V HL----- : 121  
CbrFLA24 : DDSFMKLDPE-----LWRCA-----TTGQGPLDVLSQITMLYHF V TSGNFTAAEVATKTQ-----LTSAS---G-MP-----IDVKD-V-NG-----NVVLE---G-----Y--AAITGPDALT-SPNAT V HL----- : 121

<sup>a</sup>Type 2

\*  
AtrFLA10 : -----IDKVI L FFP : 344  
AtrFLA11 : -----IDKVI L QPK : 293  
AtrFLA5 : -----IF----- : 90  
AtrFLA1 : ----- : -  
AtrFLA2 : -----VPKVI L LP- : 135  
AtrFLA7 : -----VDSVI L LP- : 134  
AtrFLA3 : -----VDKVI L LP- : 138  
AtrFLA8 : -----VDKVI L LP- : 135  
AtrFLA9 : -----VDNVI L LP- : 131  
AtrFLA4 : -----ISHVI L LP- : 128  
AtrFLA6 : ----- : -  
AtrFLA12 : -----I----- : 89  
FLA16 : -----IDGVI L FPK : 358  
FLA17 : -----IDGVI L FP- : 360  
FLA15 : -----IDGVI L FPE : 354  
FLA18 : -----IDGVI L FFP : 366  
FLA1 : -----TDKVI L LPK : 292  
FLA22 : ----- : -  
FLA20 : -----FNQMT----- : 281  
FLA21 : -----ISHT L EIP : 269  
FLA19 : -----IADLT L PL- : 99  
FLA4 : -----VSKVI L LP- : 315  
FLA10 : -----VDNVI L LP- : 132  
FLA8 : -----VDNVI L LP- : 132  
FLA11 : -----VDQVI L LP- : 137  
FLA12 : -----VDKVI L LP- : 136  
FLA7 : -----VNRVI L LP- : 134  
FLA9 : -----VDMVI L LP- : 136  
FLA6 : -----VDSVI L LP- : 138  
FLA13 : -----VDMVI L LP- : 137  
FLA14 : ----- : -  
FLA3 : ----- : -  
FLA5 : ----- : -  
FLA2 : -----IDKVI L LPR : 293  
CreFLA11.1 : -----VDTVI L VP- : 107  
CreFLA11.4 : -----LDGVI L V-- : 129  
CreFLA1 : -----INKVI L LP- : 131  
CreFLA10.2 : -----VDRVI L --- : 145  
CreFLA9 : ----- : -  
CreFLA8.1 : -----VDKVI L LP- : 131  
EgrFLA9 : -----IDGVI L FFP : 365  
EgrFLA5 : -----IDGVI L FP- : 362  
EgrFLA10 : -----IDKVI L LP- : 294  
EgrFLA11 : -----IDKVI L MPK : 294  
EgrFLA16 : -----VLDVI L --- : 252  
EgrFLA14 : -----ILDVI L --- : 241  
EgrFLA15 : ----- : -  
EgrFLA19 : ----- : -  
EgrFLA4 : -----VSRVI L LP- : 137  
EgrFLA12 : -----IDKVI L QP- : 292  
EgrFLA8 : -----VDHVI L LP- : 134  
EgrFLA7 : -----IDKVI L LP- : 134  
EgrFLA13 : ----- : -  
EgrFLA6 : -----VDKVI L LP- : 131  
EgrFLA1b : -----VDKVI L LP- : 136  
EgrFLA3b : -----VDQVI L LP- : 122  
EgrFLA2b : ----- : -  
EgrFLA17 : ----- : -  
EgrFLA20 : ----- : -  
OsaFLA17 : -----IDAVI L FFP : 351  
OsaFLA24 : -----IDAVI L FFP : 358  
OsaFLA16 : -----IDAVI L FFP : 358

Type 2

|          |   |        |           |   |     |
|----------|---|--------|-----------|---|-----|
| OsaFLA4  | : | -----  | VDTVLEP   | : | 107 |
| OsaFLA23 | : | -----  | IDAVIMPL  | : | 94  |
| OsaFLA12 | : | -----  | VSKVLLP   | : | 304 |
| OsaFLA1  | : | -----  | VDSVLLP   | : | 132 |
| OsaFLA5  | : | -----  | VDRVLLP   | : | 135 |
| OsaFLA8  | : | -----  | VDKVLLP   | : | 136 |
| OsaFLA27 | : | -----  | LNKVLLP   | : | 134 |
| OsaFLA26 | : | -----  | VSKVLLP   | : | 135 |
| OsaFLA7  | : | -----  | VDKVLLP   | : | 138 |
| OsaFLA14 | : | -----  | LDTVLLP   | : | 134 |
| OsaFLA2  | : | -----  | VDNLMP    | : | 136 |
| OsaFLA11 | : | -----  | VTKEFKP   | : | 294 |
| OsaFLA9  | : | -----  | VDKVLLP   | : | 139 |
| OsaFLA3  | : | -----  | TSKEFQOP  | : | 132 |
| OsaFLA18 | : | -----  | VDKVLLP   | : | 136 |
| OsaFLA13 | : | -----  | LNRVLLP   | : | 139 |
| OsaFLA15 | : | -----  | LDVAVLLP  | : | 138 |
| OsaFLA19 | : | -----  |           | : | -   |
| OsaFLA10 | : | -----  | VDAVLEP   | : | 135 |
| OsaFLA6  | : | -----  | VDKVPLP   | : | 135 |
| OsaFLA25 | : | -----  |           | : | -   |
| OsaFLA20 | : | -----  |           | : | -   |
| OsaFLA28 | : | -----  |           | : | -   |
| PabFLA22 | : | -----  | IDKVLEFP  | : | 354 |
| PabFLA9  | : | ISVQGI | IDKVLFPP  | : | 120 |
| PabFLA1  | : | -----  |           | : | -   |
| PabFLA2  | : | -----  |           | : | -   |
| PabFLA3  | : | -----  |           | : | -   |
| PabFLA4  | : | -----  |           | : | -   |
| PabFLA17 | : | -----  |           | : | -   |
| PabFLA15 | : | -----  | VPRVLLP   | : | 305 |
| PabFLA5  | : | -----  | VPKVLLP   | : | 146 |
| PabFLA20 | : | -----  |           | : | -   |
| PabFLA21 | : | -----  | VDKLEFKP  | : | 291 |
| PabFLA16 | : | -----  | ISGVLLP   | : | 292 |
| PabFLA10 | : | -----  | VGKVLLP   | : | 136 |
| PabFLA6  | : | -----  | VDKVLEP   | : | 135 |
| PabFLA11 | : | -----  | IDKVLEFKP | : | 124 |
| PabFLA18 | : | -----  | IVRPFL    | : | 313 |
| PabFLA7  | : | -----  |           | : | -   |
| PabFLA19 | : | -----  |           | : | -   |
| PabFLA12 | : | -----  | VNKVLLP   | : | 114 |
| PabFLA13 | : | -----  | VDKVLLP   | : | 84  |
| PabFLA8  | : | -----  | VDKVLEFKP | : | 92  |
| PabFLA14 | : | -----  | MGKVLLP   | : | 125 |
| PabFLA23 | : | -----  | IDRVLE    | : | 99  |
| PabFLA24 | : | -----  |           | : | -   |
| PpaFLA10 | : | -----  | VLTTPP    | : | 374 |
| PpaFLA11 | : | -----  | VLSPP     | : | 361 |
| PpaFLA6  | : | -----  |           | : | -   |
| PpaFLA7  | : | -----  |           | : | -   |
| PpaFLA8  | : | -----  |           | : | -   |
| PpaFLA9  | : | -----  |           | : | -   |
| PpaFLA1  | : | -----  | VNTVLLP   | : | 141 |
| PpaFLA2  | : | -----  | VNNVLLP   | : | 141 |
| PpaFLA3  | : | -----  |           | : | -   |
| PpaFLA4  | : | -----  |           | : | -   |
| PpaFLA5  | : | -----  |           | : | -   |
| PpaFLA12 | : | -----  |           | : | -   |
| PtFLA1   | : | -----  | IDGVLFPL  | : | 358 |
| PtFLA19  | : | -----  | IDGVLFPL  | : | 357 |
| PtFLA6   | : | -----  | IDGVLFPE  | : | 362 |
| PtFLA8   | : | -----  | IDGVLFPE  | : | 362 |
| PtFLA5   | : | -----  | IDKVLLP   | : | 293 |
| PtFLA22  | : | -----  | IDKVLLP   | : | 293 |
| PtFLA42  | : | -----  | LNQLLTTPP | : | 260 |
| PtFLA51  | : | -----  |           | : | -   |
| PtFLA52  | : | -----  |           | : | -   |
| PtFLA37  | : | -----  | LDGILE    | : | 105 |
| PtFLA17  | : | -----  | VDNVLLP   | : | 132 |
| PtFLA53  | : | -----  |           | : | -   |

| Type 2     |                 |       |
|------------|-----------------|-------|
| PtFLA41    | : -----         | : -   |
| PtFLA38    | : -----VSKVLP-  | : 307 |
| PtFLA30    | : -----VSKVLP-  | : 307 |
| PtFLA20    | : -----VDKVLP-  | : 134 |
| PtFLA23    | : -----VDKVLP-  | : 134 |
| PtFLA18    | : -----VDKVLP-  | : 135 |
| PtFLA10    | : -----VDKVLP-  | : 134 |
| PtFLA16    | : -----INKVLP-  | : 291 |
| PtFLA34    | : -----IDKVLP-  | : 134 |
| PtFLA9     | : -----VDQVLP-  | : 136 |
| PtFLA12    | : -----VDKVLP-  | : 135 |
| PtFLA7     | : -----VDQVLP-  | : 136 |
| PtFLA2     | : -----LDKVLP-  | : 134 |
| PtFLA13    | : -----IEKVLP-  | : 134 |
| PtFLA47    | : -----IEKVLP-  | : 134 |
| PtFLA40    | : -----IEKVLP-  | : 134 |
| PtFLA28    | : -----IEKVLP-  | : 134 |
| PtFLA39    | : -----IEKVLP-  | : 134 |
| PtFLA50    | : -----IEKVLP-  | : 134 |
| PtFLA29    | : -----IEKVLP-  | : 134 |
| PtFLA32/49 | : -----IEKVLP-  | : 134 |
| PtFLA45    | : -----IEKVLP-  | : 134 |
| PtFLA35    | : -----IEKVLP-  | : 134 |
| PtFLA46    | : -----VDKVLVP- | : 134 |
| PtFLA3     | : -----VDKVLP-  | : 135 |
| PtFLA15    | : -----VDKVLP-  | : 135 |
| PtFLA14    | : -----IEKVLP-  | : 118 |
| PtFLA48    | : -----VDKVLP-  | : 135 |
| PtFLA27    | : -----VDKVLP-  | : 135 |
| PtFLA43    | : -----IEKVLP-  | : 123 |
| PtFLA33    | : -----IEKVLP-  | : 98  |
| PtFLA21    | : -----         | : -   |
| PtFLA26    | : -----         | : -   |
| PtFLA4     | : -----I-----   | : 259 |
| PtFLA44    | : -----V-----   | : 276 |
| PtFLA24    | : -----         | : -   |
| SmoFLA1    | : -----         | : -   |
| SmoFLA2    | : -----         | : -   |
| SmoFLA3    | : -----         | : -   |
| SmoFLA6    | : -----VNRVLP-  | : 295 |
| SmoFLA7    | : -----VNRVLP-  | : 303 |
| SmoFLA8    | : -----IDAVLP-  | : 301 |
| SmoFLA9    | : -----         | : -   |
| SmoFLA4    | : -----IDRVLP-  | : 145 |
| SmoFLA5    | : -----VSRVLP-  | : 143 |
| BdiFLA23   | : -----IDAVLLPE | : 358 |
| BdiFLA22   | : -----IDAVLFPP | : 359 |
| BdiFLA9    | : -----VSKFLQPK | : 107 |
| BdiFLA1    | : -----VDKVLPL- | : 107 |
| BdiFLA2    | : -----         | : -   |
| BdiFLA20   | : -----VSKVLP-  | : 312 |
| BdiFLA10   | : -----VSKVLP-  | : 139 |
| BdiFLA11   | : -----LNKVLP-  | : 134 |
| BdiFLA3    | : -----VDSVLP-  | : 132 |
| BdiFLA12   | : -----VDKVLP-  | : 137 |
| BdiFLA8    | : -----VDKVLP-  | : 138 |
| BdiFLA13   | : -----VDKVLP-  | : 136 |
| BdiFLA4    | : -----IDRVLP-  | : 134 |
| BdiFLA14   | : -----VDKVLP-  | : 138 |
| BdiFLA15   | : -----VNQVLP-  | : 139 |
| BdiFLA16   | : -----LDRVLP-  | : 136 |
| BdiFLA17   | : -----VDAVLP-  | : 136 |
| BdiFLA21.1 | : -----         | : -   |
| BdiFLA21.2 | : -----         | : -   |
| BdiFLA5    | : -----VDSLIMP- | : 137 |
| BdiFLA18   | : -----LDAVVEP- | : 137 |
| BdiFLA6    | : -----         | : -   |
| BdiFLA19   | : -----         | : -   |
| BdiFLA7    | : -----         | : -   |
| MpoFLA6    | : -----IDEVLP-  | : 301 |
| MpoFLA1    | : -----VNAVLP-  | : 135 |



| Type 2     |   |               |       |
|------------|---|---------------|-------|
| MpoFLA14   | : | -----         | : -   |
| MpoFLA4    | : | -----         | : -   |
| MpoFLA7    | : | -----IDKVLFP- | : 293 |
| MpoFLA2    | : | -----INHVLIP- | : 134 |
| MpoFLA3    | : | -----INHVLIP- | : 134 |
| MpoFLA5    | : | -----         | : -   |
| MpoFLA8    | : | -----IDEVLFP- | : 294 |
| MpoFLA9/10 | : | -----IDAVLFP- | : 293 |
| MpoFLA11   | : | -----IDQVLFP- | : 293 |
| MpoFLA12   | : | -----IDQVLFP- | : 293 |
| MpoFLA13   | : | -----         | : -   |
| CcrFLA1.1  | : | -----IDTVLFP- | : 151 |
| CcrFLA1.2  | : | -----IDLVLFP- | : 152 |
| CcrFLA1.3  | : | -----IDSVLFP- | : 137 |
| CcrFLA1.4  | : | -----VDSVLFP- | : 136 |
| CbrFLA1    | : | -----IASVLL-- | : 131 |
| CbrFLA2    | : | -----         | : -   |
| CbrFLA3    | : | -----IDTVMVP- | : 130 |
| CbrFLA4    | : | -----IDQIIM-- | : 129 |
| CbrFLA7    | : | -----INDIIFP- | : 132 |
| CbrFLA9    | : | -----INDIIFP- | : 132 |
| CbrFLA11   | : | -----IDSVLIP- | : 135 |
| CbrFLA15   | : | -----VDTLLIP- | : 150 |
| CbrFLA16.1 | : | -----IDSIIFP- | : 124 |
| CbrFLA16.2 | : | -----INKVLLPP | : 102 |
| CbrFLA16.3 | : | -----VDTVLLP- | : 98  |
| CbrFLA16.4 | : | -----VDRVLP-  | : 123 |
| CbrFLA19   | : | -----IDTVMIP- | : 135 |
| CbrFLA20.1 | : | -----FSRIMLP- | : 109 |
| CbrFLA22   | : | -----IGELLVP- | : 129 |
| CbrFLA23   | : | -----IGELLVPE | : 129 |
| CbrFLA24   | : | -----IGELLVP- | : 128 |
