# Supplementary material for: Evolution Analysis of the Fasciclin-Like Arabinogalactan Proteins in Plants Shows Variable Fasciclin-AGP Domain Constitutions
Source: MDPI journal article supplement (doi:10.3390/ijms20081945), 2019-04-20
Supplement: s1 [file s1]

Figure S2. Multiple sequence alignment of Type 1 fasciclin domain sequences. Residues with high similarity (100%, 80%, 60%) were highlighted in red, dark pink and light pink, respectively.

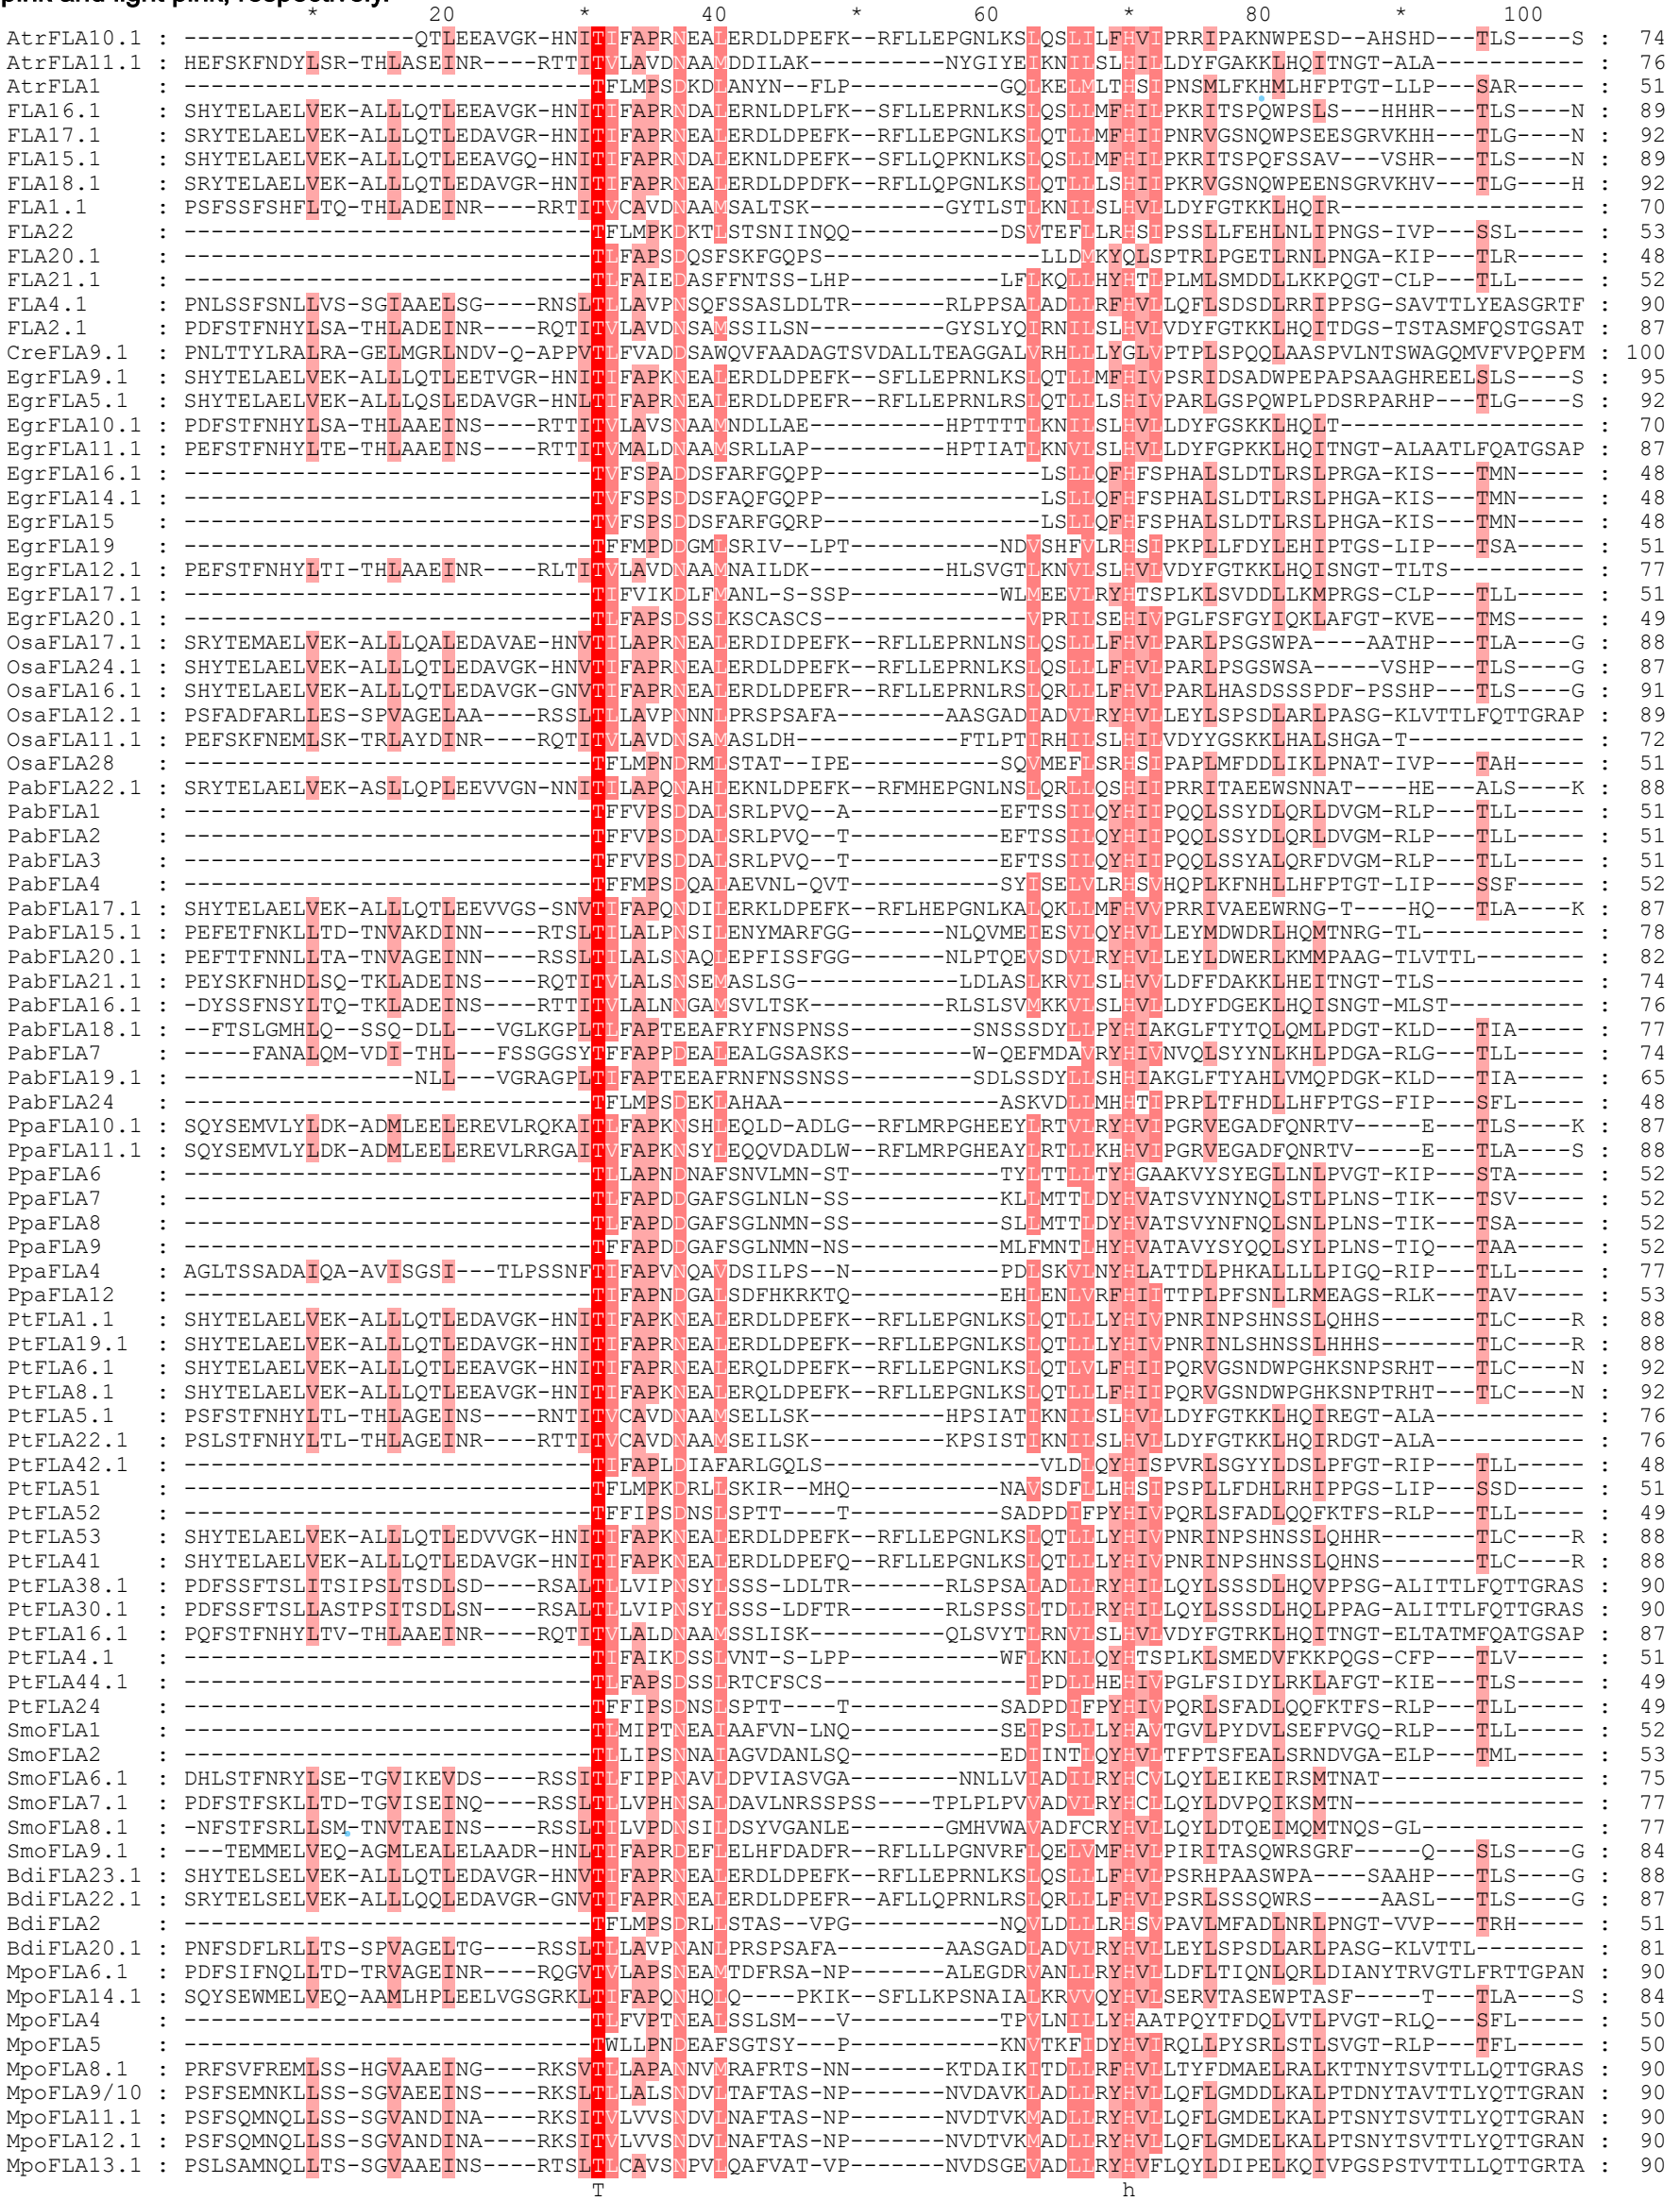

```

      *      120      *      140      *      160      *
AtrFLA10.1 : DRL-T---LTCK-----NRVRKVD-----LASLIHPDSIVRP---DGVIHGIERLLIP : 115
AtrFLA11.1 : ----- : -
AtrFLA1 : -HSRFLNVSNHG-----SYSFYL-----NNARIVAPNVCGST---NIRCHGLSTIEY : 95
FLA16.1 : DHL-H---LTVD-----VNTLKVD-----SAEIIIRPDDVIRP---DGLIHGIERLLIP : 130
FLA17.1 : DQV-R---LSNG-----QGKKMVD-----LAEIIRPDDLTRP---DGLIHGIERLLIP : 133
FLA15.1 : DHL-H---FTN-----GKVN-----SAEITKPDLLTRP---DGLIHGIERLLIP : 126
FLA18.1 : DQVLHL SKLKGT-----NGKRLVN-----SAVITRPPDLTRP---DGLIHGIERLLIP : 137
FLA1.1 : ----- : -
FLA22 : -PHYTLEISNGG-----RSNYFL-----NNVKIISRNICSLG---SIKCHGIDGILQS : 97
FLA20.1 : -SNYSLITVTNSS-----RFGGKTSI-----NNVVQDSPVFDDG---YVVIYGSDE--- : 90
FLA21.1 : -HHKSVQISTVN-----QESRTAEV-----NHVRITHPDMFLGD---SLVIHGVIGPFSP : 98
FLA4.1 : FGSGSVNV----- : 98
FLA2.1 : GTSGYINITDIK-----GGKVAFGVQDDSKLTAHYVKSVEKPY---NISVLHISQVLTLS : 140
CreFLA9.1 : GAVSSSAGTE-----ARIT---GRVKVC---ESYAYRVAYVIMP : 133
EgrFLA9.1 : HRL---RLAKRE-----SGEREVD-----RARVIHADAVARP---DGVIHGIERLLIP : 137
EgrFLA5.1 : DPV-HLS-VAPG-----SGLPAVD-----SAEVVRPDDVVRP---DGVIHGIQRLIP : 135
EgrFLA10.1 : ----- : -
EgrFLA11.1 : GSTGFVNITD----- : 97
EgrFLA16.1 : -ANHSLMVTTSF-----SDYQVEI-----NGVKIVGSPVFNDDG---NLVVFGLI----- : 87
EgrFLA14.1 : -ANHSLMVTTSF-----SDYQVQI-----NSVKIIGSPVFNDDG---NLVIFGLI----- : 87
EgrFLA15 : -ANHSLMVTTSF-----SDYQVQI-----NGVKIVGSPVFNDDG---NLVVFGLI----- : 87
EgrFLA19 : -AGYLVRIDNKG-----CRSYFL-----DDVRITKPNVCVAGS---SIRCHGIDGVLLP : 96
EgrFLA12.1 : ----- : -
EgrFLA17.1 : -AKKNVTVTRSD-----AEQRLVEI-----NGAVITHPNVFLGE---RLAIHGVLPQLL- : 96
EgrFLA20.1 : -PGHCLTVTSATHR-----VTNTRTRIFI-----DGVEISRPDMFNNG---IVVVHGLEGFIAF : 98
OsaFLA17.1 : EDV-ELAAADGG-----GGMRVA-----HAAVSRPDAVVRT---DGVIHGIDRLLVP : 131
OsaFLA24.1 : EEV-ELAAAAND-----GAMRVA-----HAAVTRPDAVLRP---DGVIHGIERLLVP : 130
OsaFLA16.1 : ERV-DLSA-----SPMRVG-----AAAVTRPDAVVRP---DGVIHGIERLLVP : 130
OsaFLA12.1 : SDLGAVNLTVGG-----NST-VVVR- : 109
OsaFLA11.1 : ----- : -
OsaFLA28 : -SSQTITITNVK-----HQKIYF-----NNIELISPDVCRVGD---LFRCHGINGVIRP : 96
PabFLA22.1 : DGL---QFSVKE-----NNIKAVD-----LAVLTRPNNAVVRP---DGVIHGIDRLLVP : 130
PabFLA1 : -ANQTIIVVTSNT-----QPNYTV-----DTLTVTHPDIFYDG---TFAVHGVADLL- : 93
PabFLA2 : -ANQTIIVVTSNR-----QPNYTV-----DTLTVTHPDIFYDG---TFAVHGVADLL- : 93
PabFLA3 : -ANQTIIVVTSNR-----QPNYTV-----DTLTVTHPDIFYDD---TFAVHGVADLL- : 93
PabFLA4 : -PNYMLKVSNNG-----DKDFYL-----NYVHVHPNVCRASP---SISCHGVSGVL- : 95
PabFLA17.1 : DRL---KLSMKG-----DKKTI-D-----LASVAHPNAVVRP---DGVIHGIDRMLIP : 128
PabFLA15.1 : ----- : -
PabFLA20.1 : ----- : -
PabFLA21.1 : ----- : -
PabFLA16.1 : ----- : -
PabFLA18.1 : -SEGSILVTFNSRGDGDLIYSSAQTLVDYRPVYV-----NGVLVSHPDLLNDG---LLTIHGVDPQL- : 136
PabFLA7 : -RSRSLTFTTFAPE-----SENETLMV-----NNVSVSFPDL----- : 105
PabFLA19.1 : -SVGSIIVVTFNSHGDLS---SSTQLRAEYRPVYL-----NGVLVSHPDLLSDG---LLTIHGVDPQLV- : 121
PabFLA24 : -PDYMYSVANDG-----KNNFSL-----NNVKIVTPDLCNGSP---AIQCHGISSVI- : 91
PpaFLA10.1 : GDVVG---LRTY-----GLKRYVG-----LLRVFSPNSIVRK---DGIHVGVGLMVP : 129
PpaFLA11.1 : GNVVG---LRSH-----GLKRYVE-----SARVFSFNSIVRK---DGIHVGLDGFMIIP : 130
PpaFLA6 : -ANVVIVVTSNS-----DDSQIVDPDIFVDN---TVAVHGINVNL- : 94
PpaFLA7 : -PDVVILITSTG-----TSGLRL-----DNVAISDPDLYVDS---QIAVHGISAVM- : 94
PpaFLA8 : -PNVEIFVTSTG-----TDGLRL-----DNVAISDPDLYADG---QMAVQGISSVM- : 94
PpaFLA9 : -PNVVMYITSTG-----EDGLML-----DNVVISDPDLYLDD---KVAVHGISVM- : 94
PpaFLA4 : -PDNTLLVTDNN-----LANYSI-----NNEQILYFDL----- : 104
PpaFLA12 : -SNFTLLVTNTT-----KDAYQV-----DDATIIDPDLYTGA---TIAVHGINAV- : 94
PtFLA1.1 : DRV---KLSSQE-----SGEKLID-----SAKIIQVNAVERP---DGVIHGIERLLIP : 130
PtFLA19.1 : DRI---KLGSQ-----SGEKLID-----SAKIIQVNAVERP---DGVIHGIERLLIP : 129
PtFLA6.1 : DHL---HLITKN-----SGKKVVG-----SADVTRPDDVTRP---DGVIHGIERLLIP : 134
PtFLA8.1 : DHL---HLITKN-----SGKKLVG-----AAVLTRPDDVTRP---DGVIHGIERLLIP : 134
PtFLA5.1 : ----- : -
PtFLA22.1 : ----- : -
PtFLA42.1 : -PNHSLIIVTTSLS-----YFDGKLSI-----NGISIEESALVDFG---SLIIFGMSE--- : 91
PtFLA51 : -PDYMLNISNEG-----RKSFFL-----NNVKISSPDLCTAGS---SIRCHGIDGVLL- : 95
PtFLA52 : -FDKSLITNNS-----ASNFTL-----DGSRLTHPDIYTNA---AITVHCIDNLL- : 91
PtFLA53 : DRV---KLSSQE-----SGEKLID-----SAKIIQVNAVERP---DGVIHGIERLLIP : 130
PtFLA41 : DRV---KLSSQE-----SGEKLID-----SAKIIQVNAVERP---DGVIHGIKRLIP : 130
PtFLA38.1 : SNSGSVNITRNP-----VTN-A----- : 106
PtFLA30.1 : SNFGSVNITRNP-----VTN-A----- : 106
PtFLA16.1 : GASGYVNITDLN-----GGKVA----- : 104
PtFLA4.1 : -DRKKLAVTKID-----AKERLAEI-----NHVLVSHPDMVLER---RITIHG- : 91
PtFLA44.1 : -PGRCITVTSTSLKNDS-----ATPSTVKVFI-----GGVEITHPDLFNNG---VLIHGIQGYIAP : 102
PtFLA24 : -FDKSLITNNS-----ASNFTL-----DGSRLTHPDIYTNA---AITVHCIDNLL- : 91
SmoFLA1 : -FGNQLVVTDNS-----AAGYRL-----NTARIVRPNMCGNSTS--VVTCHGIDRVLNP : 98
SmoFLA2 : -QGEMITVTSNS-----PGNFTL-----NEVNIITHPDVCSSTR---FIACHGIDRVL- : 96
SmoFLA6.1 : ----- : -
SmoFLA7.1 : ----- : -
SmoFLA8.1 : ----- : -
SmoFLA9.1 : SRD-EVLLHWNK-----KQRLAVD-----RSTVDWPDIMIVRS---DGVVHRIDGLLVP : 128
BdiFLA23.1 : EDL-ELAAG-SN-----GSMRVA-----HASVTRPDAVLRP---DGVIHGIERLLVP : 130
BdiFLA22.1 : EHL-ELISLSDSS-----TTAMLAG-----SAAVTHPDAVVRP---DGVIHGIEKLLIP : 131
BdiFLA2 : -TNQMVTTITKRE-----HRQLYF-----NNIELTSPDICRGGD---SFRCHGINGVLRP : 96
BdiFLA20.1 : ----- : -
MpoFLA6.1 : ADDASVNIYNTP-----SNI-FIGSSAVDSSQNSTVISTVFLQPS---DVSIVIMIDRTLQP : 142
MpoFLA14.1 : EAV-W---LSTQ-----GPILMAG-----DVAVAAPDAIIRP---DGVVHGVVEMLIP : 125
MpoFLA4 : -ANESVLITNNA-----RNNFQV-----DNVRIVLANVCASNTDLQISCHGVESIL- : 96
MpoFLA5 : -GSETVVVTSNL-----REFNYSL-----DNAMIVVPDLYSDS---TVAVHGINSVLN- : 93
MpoFLA8.1 : GNNGFVNIYNLK-----SRV-KLGPSVPDSSSNVTVLAGVQKSPF---DVSIIEDQVLLP : 142
MpoFLA9/10 : DNDGFVNIYN----- : 100
MpoFLA11.1 : NNDGFLNIYN----- : 100
MpoFLA12.1 : NNDGFLNIYN----- : 100
MpoFLA13.1 : GNDGGSVNI----- : 98

```
