# Supplementary material for: Evolution Analysis of the Fasciclin-Like Arabinogalactan Proteins in Plants Shows Variable Fasciclin-AGP Domain Constitutions
Source: MDPI journal article supplement (doi:10.3390/ijms20081945), 2019-04-20
Supplement: s1 [file s1]

**Figure S4.** FLA protein sequences in 13 plant species. Signal peptide is highlighted in green. The fasciclin domain is denoted by blue. Yellow highlighted sequences are AGP regions, and the red sequences in AGP regions indicate putative AG glycomodules (Ala–Pro, Ser–Pro, Thr–Pro, Gly–Pro, Val–Pro and Pro–Ala). Red highlighted sequences are the GPI-modification sites.

#### Red algae

*Chondrus crispus*

> CHC\_T00002202001

MTLRPIIIILLALLAAAAAQDGPLPPSAADDVDPDAVVPDPRPTILGLLASDPDQFSVLALAAALAVPDLTEALG  
 DPNRRLTVFAPTNAFAALTNLSPGAGVDAADPEGILFALMGALPGPLPGRSPGEVLTILSYHLLAFAAP  
 FQELENDGTAETVQGTLRFRDGRVVDPRSRNPRPDPRNVFTQNGWVHVIDTVLLPFNLETALAPLTP  
 DGPDPPIIEEAEDVPDAILLDRPTILGFVESRPDSFGILARAVGTVDLSLKALDDPNRFTVFAPTDEAFTAL  
 ANQLVPGADLNPAADKDAVVEALVSAIPLADVEAAANSTIESILGYHALPFAAPFQELEDMSAETVQGDAL  
 LRFADGLVIDADESRENVPADPRNFFPQNGWVHVIDLVLLPFDLDAVLGPSEPEMPEEGQPIDISEAEDVP  
 DATIPDPRPTILGLVQSDPEQFQILGRAVGTVDLSLEVLGNPGSRLTVFAPTDEAFTNLANTLVPDANLEAS  
 DKDAVVEALVTAIPLADVEAAGGATIESILLYHALGMAAPLGKLEEMKTAKTLQGGVLSFNSGSVTDDDP  
 SREDAVVDPRNIFTQNGWVHVIDSVLLPFDLGAVVNPSEPEMPEEGQPIDISEAEDVPDATIPDPRPTILGL  
 VQSDPEQFQILGRAVGTVDLSLEVLGNPGSRLTVFAPTDEAFTNLANTLAPDANLEASDKDAVVEALVTAI  
 APLADVEAAGGATIESILLYHTLGEASPIQELEKSDTLTLQGDSISVADGKVTDGDDSRDDAAISTPNIFLQ  
 NGWVHVVDVLLPFNLGNLASAASPSISPEAEASPNISPEAEASPDEDDDDDGVCFPESATIRLADGSSVP  
 MHLEAGTEIHVGREGKTSRIFAFTHKNRVRRTLFYALTASGHSVTLTGSHLYANGKLTAAAGAVQIGDML  
 DTRAGNSQVVRVGRVHGKGLFAPHTLHGDLEVDGVVSGYSRALNPTIAHGLLAPVRLTKYAGVVEPLG  
 SLFYDGADRIASYLPKGSRRYE

#### Green algae

*Chlamydomonas reinhardtii*

>Cre09.g393450

MGHIGLLLLLALLVAPGALSQSSPYDYVSSRTDMTFMKKCIDNLLPKNKQPWTATQNKALTMFLVTDE  
 GFRTTFSGLNIRTTLTGTDPERFCTVVTCKMNNTRNAIFKYHVLAAANLGARTRAQLPGNCPVGPDPGLPGCP  
 YNTQAGGKNLLDVITVAEADDVVGTDKTYLIGGVDANYADYVKFPNGTNDYDRAVKGRILHTINALLVPTR  
 YVPIPKSPSPSPAPKPAKPAPTSPASSPGPVISSSPSPPPPSPPPSPPPSPPPSPPPSPPPNPPPPN  
 PPPPPGIA SPPPPSPAPSPNPPSPRPPSPYAGFKSIYDFLSQRVADLSRVKASVDAADLFLQLSDPSLAWT  
 CFFPDDDSADWNQLWAGVYGEGRNLLQQTQYVNCWDSVRAGALNPKCPNATREYVGMQNVYLQ  
 SCSPSAPLVSTDVWANRANLSTVAPYSGLTTWRMGPNPANASTTLWVTTVFDPFPMPSGLLLPNVLNA  
 QGVVAIRKRDNLVANS MVQVISSFLGDYAAAPPPPPSPAPPSAPPPQAFATISTALLGQNALS VTRQVI  
 TLYNLQVRNALADTTCYFPSNQAWALFAANGNDQGAFISVAANGTFTPLSRHRRSLLQSQPLPQHVTAI  
 RFCALGFCATADLTAGASGAAAQARRSLAMGPNPFNGSRFADTLTWNVTLEPADSYNRAIMRNVILQSC  
 YNPPSAAGSQNAGANAVRRLVDTDEFWETALGWGSSTGIVVQKTPYTGPCGNNVTVSGVATSGALTNL  
 PNVDLEALGYCTQCAQSDPATGLYAGCAFTVYSIATGGASGFDPNPTNTSASVITGLGYSRARSVPAYWVP  
 HDIVVGTYDAPKGYIQLLDRLVLSPRLPPPPSPPLPPSPPPAPFPPPPFTGLRPLLEGNSNFNDCAAKLFAAT  
 NYYPYVEQFDTSGWTLFIPTDDGCQLGLQTYDSTTSGTLAQNIATAIANGYARSLVKNMFVVNAYLSSGA  
 INNFTSAVTDQGLFGNSAIGTNTLIFRKTGAISLFQRYPGSSGAFPGGFPQMTADVLADIPIVQRNPALG  
 GVGLAGYVHMTSMLLTPYLVAQSPSPAPPLPPSPPLPPPPTAFPNGLQDYLNANPELSILNTLLSCTNS  
 TTTIQNLLNQGAQYTLAPTDTAFSNYLNAGIGGNWRDVLCTNTNGRAAQADLLNAHFIAGVYFGVNI  
 TANNNTAANLYTYAFNASYKIQLNLNGLYTVRQQMPITSQTFVSGKYDNAINGTAAVAHMITAVLALPVP  
 FPPPPPPPPPGNGPAGAAVSVYVGLRNEPEAALFVNLVDKFNLTLP SGVSTPATAYLNTPD TVATVLVPS

VNAVNAFLGRVSFAGTPMSYADCIAPSGTPQQVAAKLAVCGGIVQFAVLPGTQFLPSFTAADYTLNPPIVA  
DGTFKYILIGNNTGAGSSATKIAYRLDTSTNPVTTSLAFQTTTSPPCSLAVTSKGPIAGVPNFLTQKQGM  
YVISQVLPFQEIYNSAIGSGATYAGCPP

>Cre09.g394200

MGRLSVALAVAVALLAVLPGGVLSQSSPYDISSRSDMTFMKKCIDNLLPKNKQPWTATSNKALTMFLVTD  
DGFRTTFSGLNIRTTLGTDPERFCTVVTKKMNNTRNAIFKYHVLAANLGARTRAQLPGNCPVGPDGLPGC  
PYNTQAGGKNLLDVITVAEADDVVGTDKTYLIGGVDANYADYIKFPNGTNDYDRAVKGRILHSINALLVPT  
RYVPIPRSPSPAPKPSPKPAPTSPASSPGPVISSSPSPPPPSPPPSPPPSPPPPAPPPSPPPPNPPPP  
SPPPPPGVASPSPPSPAPSPNPPSPAPPPSYAGFASIYDFVSQRVADLSRMKTAIDNVKLTARLSDPALA  
WTCFFPEDTSISWGLNWPGTARNYAEQGAFFVASCIANPAFAPT CNTSVIEYTGVM TNVILQQCTPAALITT  
SNWVNSTTNYTTVAPFGGLTIFRSSNLANATFWVASKFDPNPQPISGVLAANNVTSTGLIVIRKRDNFVG  
QSVVQVVTSTFTGNYYAAPPPPPPSVPSPAPPPPIAYGSITSAINGVAGLQITRQLISIFNLTAKVNALAGTT  
CYFPSNQAWALFGNNVNDLGAFVNV TANGTAVPLSSRRLSAMEDGDNLQFCVPSHGFCAMASTVPLR  
RMLINIPNRFNATQFLDLLAWNVTVEPSGVASMPVFKAQILANTILSGCYNPPTAPGSQNVGNVAVRKLVD  
TDNFAWETALGWSVDVGIVVQKTPYTGTGCGNNVTVTGTATSGAAINLPNVDLENLGYCTQCTTYDNDTM  
LYSGCSFTVYSISTGGASGFDTVNGVQQITTLGYSRGRSPVAYWVPHDIVVGTYDNP TGYYQLIDRIILSPRL  
PPPPSPPLPPSPPPAPFPPPPFTGLRPLLEGNSNFNDCAAKLFAATNYYPYVEQFDTSGWTLFIPTDDGCQA  
ALTAYDPATYNGNLTQNVNTAISNGYARTLVKNMLVVNAYLSSGSINNLTAVTDQGLYGNTTVGTNTLTFL  
KTSVISVSQQYPGFPKMTSNITIADIPVQRNPNALGGVGLAGYVQMTTMLFTPPLAFQAQSPSPAPPL  
PPPSPLPPPPPVAFPNGFQDYLNAPELSILNALLSCTNSTTTIQNLLNQGAQYTLAPTDTAFSSFFSSNNI  
GGNWRDVL CNTTNGQNTKTAQLLAVHVIAGANFAVNITANNNTAANLYNYAFSAGFKIQLLNLGGVYTV  
RQQMPITSQTFVAGKYDNAINGTAAVAHMITAVLALPVPFPPPPPPPPPGNGPAGAAVSVYVGLRNEP  
EAALFVNVLVDKFNVTLP SGVSTPATAYLNPDTVATVLVPSV NAMNGFFSRIA FSGTPMSYADCIAPTGGA  
NVVAAKTAVCAAIVQFAVLPGAQFLPSFIPATYNVSGAATVGVS DAASMYAALGNVTGYGATTASKLYYKL  
NTTPPVNAATLAFQTTTNP PCVGIASNIKGPIAGVPNFLSKLQGMIVVVSQVLPKEAYDIAVNAGATFSG  
CP

>Cre06.g278170

MKQGGLCAYLALLLAGVSASYADMVVTKSGSHRPPRRVSPSRKPPTAPTTYKSILALAAARKDLSIANA  
VLKKTAGPDFGNAPPATVFLPNDEAFKLLKALGVTQAQLLALPTKVLTEVIVYHAVPGMPLAAKDLKPK  
QVVETALPGYNLTITKDSAGVMILAAQSKAKVV TADLKAGMTIVHIVDTVLVPFDVLNPPVPPGAFDTPGG  
ALTELGLEYLVGAIEAAGLGGVLNRTDVIGTLFAPTNDAIIRTQTALANNSLGVNLMYPQVVQMILGDHVVH  
LGEKLMAADVAMRSTIPVGWAPADYATPD AHILTVTFNPAGPSVTL SGFPGNSAKVIKADVLVGTRQELV  
HVVDGVLITTQTARALGLIQANGTTAPVPTAPTAPSPSSSGTGTVPVSTVPLNLAIAIATTPDLSQLLSKAL  
AAGLGNQVATANSPLTMFAPNNAWAAFESMLNAKDPRLTAVANQIIALIISDHVHVGD SYNANALTNG  
QIPIGMDPTKYMDANATTVRVTVNATGVFLAHQVSGAKVLRTILAGPTVVNIIDSVLLSRASAAALGLIEM  
PSASPTPTPTPVPTSPVAGDTILGVISADISLAGIGQLIALTGLAEPLSDPDIEYTLFAPVNDAVTTFAELQK  
IQTYNPANPQVLQLLYQILATHVYMAGVLRSSDLTDGQVIRTGVANTPATNVTVTINSTGVFLTATNTVKVIA  
ADIAAGKSIVHKLDGVLVSPEVARLIVELSAGGGA SPAPSPSGTPSSANYSSVLAALSSNTDLIGFNGLLGITG  
ALQQLSSPNLVATFFAPTNEAIEQAGDLLASLGTNPVFTPQIQQIVNELLGSHIHLGEALTYADLNMDGKKIP  
VGLNPAAYTAADNTVLTIVIANSTGVYQLQSTNIVMVSTTTLTAGKSIHVIDGVIVSPKLLAMLPPPGSPAPT  
PASTPGEEPAQSPSPSAGPASGTFSDVRQALTSTPDLFGFNGLLTGNNAVYAQTNNPNLVATIFAPSNAAL  
LENSEAITSLAAGAPDTTQILLRYNELLGSHIHIGEALTYADLNMDGKKIPVGLNPATYTAADNTVLTIVIANST  
GVYQLQSGNIVMVSTTTITAGKSIHIIDDVIVSTKLLSLLSGSATPSPSPSPEPADPTYDDLPSALRGQGFNHL  
ADLYDAAVNSAVGPILQSLLSAPITL FAPSDTSIDEYLSQSTTFEAF LADSKTNPINIAGLVLPHIHIGHAYTLD

EFTVGQVITTSTTGLEMFGAQLTVQEHDAKVVFSTSVGPVTVIGGIIRAGTGIIIPIDKVLKPDV

> Cre16.g679445

MATLRRRAALLLVALFAAVSVVNAQEAAQKRNPANTAASTGSGPAVDIAIQALNATGVSGKLNASTVATIFAPDDAAAFISLASSLNFTSREQVFASPFATNVTLHHIIPGVALRSTDLPAGQTVNASSLLGPTLEVTRNGNAVRVAVAGNPNSSAEVIKADIPFNAAIVHVINKVLLPPSTTAPAAAAASPSPVTAAPSPIILAPVPGGTANETTGGG

> Cre02.g095130

MTLASFALALLGLSLAISATDAAGTAETVLPAPCSAFTGANSDELARACPELSTFAKLLATADNYGKWM

LDCGKRCGTQLKLPRTVFLPVNVAWQKYFTATGTTLAGLTSKKSARKALTALMRYHVLQVVTSSRVPLAVD

AVGSSAAGSSNNGSSNNGSTIGSVAVSSSGGEEVETLQGGSTLARRPNTSTIRVEGSRNQAVVLHADISL

GTPVVHLVSDVLLLEADPPPPPELPSPMPSPSPPPSPWATPAPSPAYASPTPTPTPTSPASGTGGTSPKPL

SRPGTPTGSTITNLTWDRNVDMDLIVVASWPETDTTDTMTMFYGYTGPEALLGGGAMSASTSGGSGAL

TGFYSRTAGSWEALAWPNPLKPAPAVYTICSFYFNLEWAPGTVINADSPVTPAFSVITGADQNAGAGRG

AGSSSSSSSSSSSSSSSSSSSSNGSGSNSGEVLVGLSRPLWKPGFESFTLLPRNCSPDCAWYLGQVCVDGA

GKVRVVSATERC

> Cre17.g713150

MCRIRTDITRPSAFLAALAGLSCVLCVFAQAPCSNLTSARTIEALT KRCPTDLSSFGTILAKIPKYAQWLLDCG

TGACDNAQR TLLMPTDMALD TYLKAKGTTLT KMLAKTGGGRKALQAVLRCHVLQPSIALTSVNITAAAAP

LSYKSLQGPSLTFAESSGGVTVECGANSVAEVVHADITTGKSVVHLIDTVLQCQAAPSPPPPPSPSPSLPT

PNSSPSPSPPETPPPPSPPPSPPPSPPPPEPSLPDPPSLEPPSLNPPSPDPPSLPPTPPSAPLTPSPSPPL

PPSPAPSPDPSPSPAPPSPPLQSPPNPPPPPPWYSLGGLDSYPFCAGEVCSRQQLCTAERKCMCGTGP

CGGNTACWATPDMAGWPTPPAASCVVQERICSTWDGNPRLCLPDDFCYKDIYCMSRGQLRIMLESWTS

VGDLDMWVTNPLNQTVWWNSDGWNADETRDPKWLPYGFEDNGYAVLDTQSDQYGPENVYIDKN

WQDGTAAPLPSGNFYVCARVYIQDLDPVWLKFPVIVTTIAESAKYGINMRTVVTLRDANFEPSTPTLES

DCTASSPSLVM TIPIP

> Cre17.g745097

MGKGACWIAVLVLLAATGGRSQDPPSPPEPSPAPSPPEPSPLPSPPTPPSPAPPSPPTPPSPAPPLPAVTYNSV

YDYIVKRRRTGLSFTYQLMQLAATLAPEQVAAINSSSLAVTAFLLSDTAFDAFARKWGYASTAALQVAGFGS

PAIQARTQQLNYYVYNQAFRLADLPNNASNPVDNTTTTYFNTQLTETGLASYFSRIGVRRNTNDSRPLAA

QVVGSTTAAGLLEVDVPAGAAYINLLDRVPQFYWDTPYDVLKADPEFSTLVSQLDNVPTLAGVKASLQRA

NLSQTLFAPTNAAIKFAATYNTSLDDPLLAHTLYSYLRNLSTKEVVSTDNITTVPSSLGDTVTFKSGQAPIV

KSFQPNGTWANVTVPNIPTGFQVRSFVHKIDAVVVPLPYTAPQPGAAAAAVTFASIWDYVTSRPLDSIVVI

SLKSLGQETLLRNASLDYTVFALTNDAFDNFAKVI GLNGTADIYQRPDLLTAVIETQWYH MVPQVFRVGDQ

PLNSTSYFQTRLATVLGKVGNYSRVGIQRGGAADPAFVVSTSTTANLVAQDIPAGAGYVNVVDRVLQYYVD

TMYDAIKGEPDMATLATQLDASPQLAPIKAVLSTPNITRTFLAPDTAVARLSSVYGLSMNDTSYGANIYGY

HQLTDARNLDSNYPGSSSAMSSLGCCAVNFTVTRNNGTTASSYLRDGTRATVVSANIPVGFGPVAFVHKI

DQVLLPVYTSAWHYVSQQPDHRALSALLALEGSVQGELRAPSPPLSLLAPTDAAVTKAAAAYGLTNLTQLL

TTTALQKAVLANHALSGSYPLERLNGTLDTRAGAGYLNASRSGSAITITAARSQAVVIQASSNVSILYGRAYV

HTVDTVLLPKEVPAPGDGGGAGSTAPSLALLLA VVGRATTWLLA

> Cre03.g175300

MPPQGRRFDPVWKRAFFCMLPVRGRALARHAGSSDTSIGSISTSGSSSGTSSSTSSSSSSSLDDDIPCDGT

SLVSALMMQPNLTTYLRALRAGELMGR LNDVQAPPVTLFVADDSAWQVFAADAGTSVDALLTEAGGAL

VRHLLLYGLVPTPLSPQQLAASPVLNTSWAGQMVFVPQPFMGAVSSSAGTEARITGRVKVCESYAYRVAY

VLMPALSALTAPAFSEARAAPPPPPPPACANASIPDLLSANGNLTTTLGALQVTGLEDQLYAPGVAPYTLFA

MAAAECSAMMLVATLLALYACELAPSVNA RTGSHMRPLDSLHFFRRELKTHRERMERVLEVTEPPPGGPA  
RTITVALDGS GDYKLPSEAVASLGTKSSAPVTIYIKDGVYRDRFNVVKRRWNVTMIGNPEDPSRVVIVDNRHAG  
KMGADGDDIGTFQSATATFGGYHIIVQGISFINDFPRGKPGEIGNQAVAMRASGWFIIFANCIFRGFQDITYAHK  
GVQLYKNCYIEGTIDFIFGYATAQYEDCHIHTLADPFTISA EKRQLPGARTSGFLFLRGIITGVSGKAYLGRAWGAA  
SLTWV FETQMEAFIQPAGWNNFN DPTREKTADYGEYNCSGPGSDRSGRVSWSRALTLEEVGPFLGGDRQWI  
DGNSWVRLP **SPLPPTPDGREDAATPLPISSGSPPPPPPPPPASVVPPTP** PSVEPPVLPSGFATAGLEPAAASG  
NATGVIAALRAD **PRFSIFVGLLDKGFAANLP LQPLTISVPENAA FARLPGQLDTIKADEALLYEFLGYHFADGFYP**  
**KADLLAAIAKSTSGTVSVPTQGGSYVSFSVSGDVIKVDGSTSVTEADFLVDSPNKAVAHVIASVLLSQDVTDSLAS**

SSSPPHPV\*

>CHBRA1815g00010

MKTAMKLVALTFLMSA **SPRASMAKAAFMNAPPSAAAPSTAAASGAAP** SAAMVKTGKDAKVFEILKNEM  
QFSMFYKALVDTTEIWNVEGRTVLVGEQLILFAPTNAAFSTALSEEVTCLQKEPGQATLASFLKY LQVVVPNATV  
PQVKTPKQLLKVTKDDFLWTVGGKGIA

>CHBRA83g00340

MARPADSTRALSSFLFCLAVWTAVSG **RLVAAQYPYPGAAASTTPPPYYYYPPPPP** **PASASYYYYAP** PPPPNPFA  
EQLMAELQAE **PEFQRFYEALNMSRSIDMVKGLVNSGVTLFAPVNGAFDALGAVYTECMLKRPGMDDLLPLIV**  
**RFHVATGNFVNAQLMTMSSVQSFLGLPIPLTHAAAGGLVLDGQATVTGPDVKIATVHTIDTVMVPYTARR**  
ILELLCYN **APPSSP** EEANQVAMWRMTGGG\*

>CHBRA1065g00030

MKLQGGGKERGGKGGAEEGAGEEEWEELERSQSGDMAREEEREKEGEEERGEDQEKEEREEEQERSGSGIM  
AGSFSRCLAEVERAGEEEEECEKWEKERSEECEKEWGRSGEGVGKERGRSGSGAMAREEWEKEWEKEWEN  
EGEEERGQEQKKQLEKEETEKDQEGEREKEREQEREEEREWEWERYGEILITFFGGVGGAGEGAGGGVGEGVG  
EGLQGETGSPCFLSMRCRVCADAIIRCPLLYMEGGAEVEGRRIARQRDLVMWVRKRQDEAAKTESGAKLTRG  
GLGRNTAAAALTDGQVAAQRTAA **SPLSP** SASDEDAIDISISSISSSSLSPPQKQKEEVLAQDDEEELKATKRGL  
VRPRLDHDTASLPPPLL **TPSP** FASGRQPTIDASGAAVAAPAIEGRDNSSAFSEEKGRPPPL **TPEVTPQEGGNEAG**  
**P**LMPPQPPVDELGDSDSSFSKLQRQSTVESQADEGEAT **TPASP** PHLSYPTLAGHHAGNTQISVPSILDSTDIAAIA  
NTVWSAAESATFGGDSLDSSTFQEEGEAEKVQPSVG **APSPPLTADVPTSHAAP** PFGLEGSNLQDGTVVGQLSQ  
**TPLPVLPSLVP** **SGSPA** EGVDLQIPEIAEVSTETIPPLAVLPSDDVWTESEGISLDKGQPSAEGRVVAEPPSK **SPS**  
**ASRKS LGWPS** **SPSPSPSPSPA** TVVAARNRSSLPERGLQGQLLKLREIALGKL **VPIRDSLQ** **PFRSP** **SSSSSSSSSP** **SS**  
SSSSSSSSSSSSSKFEGVSAQPAPDFDLDDQDLNLDLQEPKKLAFSPYKSTGDREVGEVGEVGS **SPGSSPSP**  
GLSSTAGANLESELALRRSNSSNPGETHEQMPVVAQAQLPGVHLQDFPVDNNYVATARSVATAKALES  
GMSSTAGGGGAESRPLWEIIGADG **APAP** QSRGIESVSIPYQPYMILPPPPPPPPPSA **SPSLESQ** **LPAPA** IT  
VVEKTRTWVSSL **SPHSH** **PVDPLPSLSPSPSPVFRSVPPSRSP** QYTNVLPPSSEPPTGFHARPLPLVGVAKVALPPS  
LSSREEDSASSLSQPRQRHSSSPSTAFKSSRASS **SPLSPNSLPTTLSSGTPA** SLQKPLHVRNVNGSAGI **APSG**  
**SPNSWSIESAAP** PSVSHVSVAQATTVPLLSLL **DGATAYANFVEAALTTRGATV** **SILLDDSNVTVFAPINS** **AFDKLS**  
**SLVDCLLSDSSSGLLDIILLNHIFEGGHPSKSLTDGQKLLT** **VANTTAEIAVNETGAFIEGAKIVE** **PDFLTGESAVHGI**  
**DQIIM** TSKLQNEIQEMCG **GPKLAPQSMASQKVSTSSP** FPEDWRPSVSTEGVAIPSENLPKSFITSSVSRAEVSAL  
TAGLWSVASLTIFSLVSLDCSWTAGIL\*

>CHBRA869g00060

MVKMMGTLSSLRMIAAIALAALISTVVA **Q**PGRPSPDLIDQSASRYNLSMYVEMLRSSSEALRTLEMQRSAGG  
GL **TVLAPTNEVVAACLHRLSSCLSGQEME** **QVMTMNLKYCALPGRFEEADLRLSIQSGGQIHLPALRGGSHQL**  
**AVSEGPSKYASAQRGLFVDNAQVLPDGFHVVSTPHVIVHVIDK** **SVV** **APDVRAMINKYCPTPAESAPSPSRVP** **G\***

>CHBRA837g00140

MLFKRWRVSVK **KPEGVTIFAPTDESLAAPESVTQCLRQSPRSNEIASAFLLSHAIPGSLPIDAQTTKVSQSPNGK**  
**FTGKFTGKFMQPTLAGGDSSAVVIRQAASRYPGANTGIFVDDAQILPDGSNNVTASGLVHHAIDGPIL** **TPHVQ**  
MLSEACPGA **VPSAPPPLTP** VDGRSARTWGGGVATSLRYS DGATRREEERH\*

>CHBRA06g01550

MAQSRVRSVLLTMAAAVFIALAGIVGA **Q** **TPAPASYVPPVYTPPPPPPPSPA** ALELLARIQGL **GDLSMF** **SNAL**  
**MASRINLTLSGIVGGGRVTVFAPNNGAFAMLSPEVKQCLDTQSGKIDVLTQIMLFHLAVGGNYTAAELKTISRLT**  
**AASGMPIDLMTLGDGTIMVEGTARVVVPDAITGVNATVHIINDIIFP** **ESILSTVMIECYNVPPSASLPVPSAGFF\***

>CHBRA06g01510

MERDGENRLAALMLGLMCVVAIAHVGA **QVV** **APPPPPPA** GTDIVSLICAQ **PGLTAFCSALNTSRVGLELLQNV**

VQRVTVFAANDAAFGSVRADIKACFDREPIDVLSQVAAFHIATGWNYTAAEMASVYVLTTLHGMPMLMVGRNV  
 NGSPLEGTASIVGPDAIHTVNATVHVIDDLVLPENLVRTIWEECFGVPASSNTPVPPASSI\*  
 >CHBRA06g01470  
 MAQSRVVRVSVLLTMAAAVFIALAGIVGAQTAPASVYVPPVYTPPPPPPPSPAALALLARIQGLGDLMSFNSNAL  
 MASRINLTIGIIGGGKVTVFAPNNGAFAMLSPELKQCLDTQSGKIDVLTQIMLFHLAVGGNYTVAELKTISRLTA  
 ASGMPIDLMTLGDGTIMVEGTARVVVPDAITGVNATVHIINDIIFPESILSTVMIQCYNVPPSASLPVPSAGFF\*  
 >CHBRA06g01400  
 MAAHLAAVFAVLLVMSPVLVHGPGPHDLLEAVRQHPRLTMFYQALVTTEYSKELSTSVDDKPVITFAPVDEAIQ  
 AATADAFPWDCLNTIAGKAALKDTLKHHVLKGRFYTVYKLTQTNQVIPADGFPIEVQYDTEKIVITLDGYAHVIE  
 PEVILMENAIVHLIDAVLT TENIYADVLDACAEAPASAPSSLG FADGL\*  
 >CHBRA06g01390  
 MAPLYVRSLAAVFTVMMLVSPFSVRAQLVPGGDLVTSMANYGLTTFVSLKLAKVDESLKGIAATGPVTVFAPSE  
 AAFAVLSSAYPAQLACVTTGQGIDNYLSQILKYHILPNGNFTASKLTKLTQVSTLIGLPIQLEYTLPSGPLKLDMTAE  
 VVQADAIFAGNGTVHVIDSVLIPETILPALMDQCGGAAPSSVAPVGL\*  
 >CHBRA741g00090  
 MERGNKEKLLVALILGLVCLAGVAQVDAQGVVPPPPPPPPPPSTPVGTDIVSLICATPGLSAFCNALATSRVSLE  
 LLQNVAVQRTVFAANDAAFGNVRANIKACFGKEPIDVLSQVAFHIATGGNYTAAELGAVYTLTTLHGMPMLM  
 MGRNVNGSPLEGTASIVSPDVIHAVNATVHVIDDLVLPENLVRNIWEVCFGVPASSNTPVPPASTI\*  
 >CHBRA741g00080  
 MERGDGGKRLAALILGLACLVGVARVDAQGVAPPPPPPPSTPVGTDIVSLICATPGLSAFCNALATSRVSLELLQ  
 NVAVQRTVFAANDAAFGNVRADIKACFGKEPIDVLSQVAFHIATGGNYTAAELGAVYTLTTLHGMPMLMMG  
 RNVNGSPLEGTASIVSPDVIHAVNATVHIIDDLVLPENLVRNIWEVCFGVPASSNTPVPPASTI\*  
 >CHBRA741g00070  
 MERGDGGKRFAAFILGLVCLVGVARVDAQGVAPPPPPPSSTPVGTDIVSLICATPGLSAFCNALATSRVSLELLQN  
 VAVQRTVFAANDAAFGNVRADIKACFDKEPIDVLSQVAFHIATGGNYTAAELGAVYTLTTLHGMPMLMMGR  
 NVNGSPLEGTASIVSPDVIHAVNATVHVIDDLVLPENLVRNIWEVCFGVPASSNTPVPPASTI\*  
 >CHBRA617g00160  
 MSMAVGDPWSSGGGVSGGRKCGRSSMIGEVAIVMRIMVMAVTALSVISAVMGQPSPSAPGHPGQVQPLP  
 DVIERSTQGKNLTLYVGALRSSRGALMAMEAQRRRPGGVTIFAPTDAAVSDQIQLGGCLAAIPDVADLVM TSS  
 LLYSAVPGHLPMAEIRSRLNQSNGLRLPTLYPPNEVAVSSATSRYPSTKMGVFDGAQIFPSGGFDVVTAPDVV  
 VQMVD TLLIPRDTTELISEFCGEATISVPPPISPGTP\*  
 >CHBRA129g00470  
 MSKGSKLRSVSSPSSSIFLSSSSSFFLSFLLCCSILAVVGETPSSSPSPSPRKSGNAVRGSSSAPASGKSPPRTRAA  
 SSSSSPPPPSPASP TQRREPSSSIMAALKEAPQYSTLVSLITKANLTVSLDTTSPLTVFAPTNDVIEALNVGDTKFLT  
 DPKNVELLKRLVIFYHFVNSKILAVNLTAGRSRLSLEGENLIVEVEDGTTFFVQGAGITAADDIREDGVVHGIDSILF  
 PLSVENAMPPPGFTDDTADPSDQSPSSSSSSSSAWQEGAPSSDV MEDYS GPPDEKFLGSSSPSSSAPSYSG  
 ELVAALKAHPDYSLIGQLLASAGPNNLAA LDSLENDTLFAPSNQGMSSSVEMAQLLTNATARNDILLYHLLAGRY  
 TFSWLKEHPGVYDNFTGFEIVVSGGGTEVFVGNAA SLGQIVTPDLYANPKIVVHGINKVLLPPEYAAVPPASASL  
 PLSLSAADEVVAVSSHSEAAAPSLAAASGSWILEEYPADDEGSLGSLAPSSLAEDSLAPMSDVGAPLLASSPSAV  
 DPSSSSMQMTAAASSDVADATAGFVSALARNSNYTQIAFLVGQVSP TDLGELTNNTLFAPSNEAITNFM LAYAA  
 LLSDNAKLDEVLKFHVLNGSYSALFLRTNPGDYGGNFVSVVQGD SLRVGYSLALGSVVAPDLYATSSITIHGVDTV  
 LLPPEYADIDVSDYDAAPSAPLASTFSTSEEDMLGSSSSPPSSSSMEMTAATDAPLESSSSSSSDGAGALSSGAAD  
 VFISALGRNSNYTQIAFLVRRVGPTYLGELTNNTLFAPSNEAITNFMVANAALLGDRAKLDEVLKFHVLNGSYTAS  
 FLRKNPGDYGGNFSDVQWDNSLMVGYSSARGLVVAPDLYATSKITIHGVDRVLLPPKYANGSADGHVPVSAA

AGPTVPVPATNGASSAAGANGQTPLTNSSSLPLGKTAARPESESPENSAAVVSSLSLGAPLVGFMHFLFFLK\*

>CHBRA513g00210

MAAAMSAAMAALFTLLLVSPVLIHGDAGGDLMKAIKADQRLHHLH QALITTGFSKELIKAVKDKPVTIFAPLD  
DAVDAATAAGWVSWDCLTSTKAGKAALKENLKHQVVNGSFYTVWKLAKTNQVIPADGFPPIEVTFDKATHLVSL  
DGYVHVAQPEAIIMKNAIVHLTGVIATESNYANMLDVCGE APPSAPPSAVFGSGL\*

>CHBRA510g00060

MAFLRSSHKWKASVVVSVFLLVFCFLSSHCGLTSAQAQPFLS SPSPPVPTTSSRPAINVSTIDPSFFQYPATMSYLL  
AKPELYRTFTRLLRIPKDKALPGSYAVQIVEAAKLNI TLLVPVEAAWTALGNAVSCLESTGAYSLTDNILRNHIIIGM  
HNATEMALNPNSYPTAGDTPVSIVSVPTGITANGANVVVPDKFMTFGGVVLNLDREVILPLDFGAQWQAACPTI  
PSV SPPPAVESVPAIAAPASGAAVPAPVGPPELTPPVAANPVNQSVGVPSTDAGVPTDVGASSAAVVDNETQ  
APGSGARDQSSSGSSLNKDGLFSFALELLVTAALVWTAYAS\*

>CHBRA04g01220

MAGTTEALRLAIAMLTCLLIWSSPGGCGAIASATAQGEDSQNVTEINAGVLLEGKLAEQ PDLTMFVQALLVSDT  
FHVAISRANGGGVTVLAPNNTAFSVFDPVAVLDCLYSKPASLNVLSQLTKYHILVGNHNATELIAMQTVHADSGLP  
LHFNLTSRGRVRISSDDDGGEAFMTRPDFRLLINSTIHVIDTVMIPVIESVFATECFAYANSND APSSSDAPPSFHL  
\*

>CHBRA476g00010

MIMRSCQGKWRVTVLGGIDGGRDRYGGGRDYGGGRERYGARETVFFFFLGLATVLA MSVDIADAVPSARLLR  
DEAIGGEEDWDVLGSASVRLVNGYLGRDTARESSSSGTL PFLHFDDVEYFLWGDHRGRLL EAVASSAVASGFHS  
AAAFGSESNDGGGVGSQPSAPADPSLARTGGGERARMPPPSVPGGASVEQSAPATAHSSMPSHGGPVSQAP  
ASGSHSAVSDGTISQGSRLPSASLSSQSPSLVEGWVDADGVSASSTNAVKSLASMSSALASSSGSIERADDTLGH  
GSEATVEAHAASASSTSAGSSSSAPAVPEFLEVIQDDTDFSILNEANNEAAARLHRSLSVGL DYVNTLRNVTFLAP  
VNSAWDFLDPAMKDCLMAGDKLVDVVVKSHTLIGKLTAE MISNVPRVENLYRFWLVNTTDDITNLTSVNNVEII  
RPDVYMFPTKVHGFSTRIMLP SNWKSFCVGDAGTGSTSVT APPPSSESP LASSHSPPPPLSSSAAP PSSSSQEG  
VQESDAST SPSPSPSPSPSSSASVIPPPSVPPVDQKFVGFIESETSLSNLTRGSEASAAAAESR APVHPGAP  
KSPIEKLSRLRNVTFLAPLDEAWHLLNP NITDCLTAGRYLLDWIIQSQTIRGKYAATAFTAGQVVYNLF GDPLHVS  
KIAESNGILRTFVNGLELVKENMYQGS DRVIHGLSGLILP KKWQKYCTPTPSPSTPGSQGGAQTPPFSSSP PPR  
DEDESVSVCARTPPQPDEGYSTVCVLPAPLPFRPSSSSS APSKPSISTPMSSSSKLPVPVSSSP TMRTEDKGSSS  
TPSVSESEPPVSDK SPDNSPIEASASEPCDVRGRGCVPGAHTASNGSVLITSSPTEGGEETDNGTIVTGTSG  
DTGEVDGAEDQGNRMATFNVISGCSSVTQMIRTGCAIPVLTSLLTTLVLFSLSLSLSDFIW\*

>CHBRA312g00020

MDVEPPGRVERDGRAQVPGDYRLEEERREMVRACFE EGILPTNIDPGEMEVS GREVKFTLNASLDEIKIRWL  
KERTVMVIFRDGARFLPKVKEDVVRAYEDVWIRDDV FEEEFKRGRIKVESPNAVSYVPRAQEITDWMLQKKS  
DFIDLACTTYRTEFKPWLARAEIRDWRQLVDQNAFWVAVGIPLDEMP SIHVHIEKAIGKVIKQHKPEADESDP  
KLVNLRFDVDPACKSNMKDKFSIQTCCQGDILEVKLVGPELEWCKRCRSFFYTEDNCRRPGRGAQGGINNNQPQ  
ASTTGSRRQPRPSYKGT RQ APGAASQPTVQPTITP LNVKQHPVIRMNPTFSPSGRQVQQHGVPLQGTGQGQA  
SSVEAAWAAYFRSFPPLGAGLQPGMGPMQYQMGMSPSVLNLHAFSLWVASVPLQEGTLGNEEAMQM MQQ  
LVSPAGMSLPVASGSRVRGKSPRKQRRVSEGVDI QVDIQTKNSGSSTDSQAAPSTAGKRKSTRLRMNALSKR  
QAVVESRAQLCVYAATYYQYILTTRRPGEDLTENLSE GSSHWDQYVVRLSPQGKLDMDRLITIEEAW EASKAVA  
KAGILSHPLLLFRVGPSETMTAMKLVALIVALSFFMSPRASM AKAFMSA APSAAAPSAASGAVPSAAMAKTG  
KDAKVFEILKNE SHFSMFYKALVDTEIWVEGRTVLVGEQLILFAPTNAAFSTALSEEVMTC LQNEPGQATLASFLK  
YLQVVVPSNATAPQVKTPKQLKVT KDGF LWTVGKGIAVTKDVDGSIRLTRDDGVDSVTVQEARPTDPTTLIPL  
EDAVVVDEDVGNTILSMCFGEEPSQSSTA APSSGSLPAP ELSSEDSDAASSESATHVDSFRRLWELLF\*

>CHBRA246g00180

MAAAGSVTFTSLAFLLLSPLFVSAQVDTSAAGDDLVGAIINHCC<sup>LKKFYALQISRIELRLDSANRG</sup>PITVFAPTD  
DSITKLDPELWTCVTTGQGPLDILSQITLYHFVTDGNFTAEEVATKRHLTSASGMPLGVKVVNGNVMLEDYAPIT  
EPNALRTSNATVHLIGELLVPE<sup>TIVSTIEN</sup>LCFAG<sup>PASAPAP</sup>SK\*

>CHBRA246g00140

MSQDRGK<sup>GPAPADPSTGPRQGHNTKAFKSP</sup>FNVDAKVYGKRDDPVWHFVARGRYLDGSTAAGRRLGRRCLC  
RLCGRSICGGAKAAREHFSKIEKFRCEEATPAVWYAIGAKDMTKYPKEFVSAIESLQSLDSGHPRFQWPPLRYLE  
DS<sup>VPPPVSTTAPSCASPLPGLAAPT</sup>DGVTAP<sup>LPAKAGP</sup>PPRPHPTVAGTSGARHEHVGRSLPANEPSPVREGGG  
VAAFDEKSTRAFVDSRRWGRDAGSSAGLATVFTAARQ<sup>SPAARATSAVAPAAPA</sup>RRSEHPWLPPPSRAARDH  
VVGHVGVMDRPDPHTVASDARHPAPPSRVGGQAVPGVPDEEVLPLADS<sup>APTPIRTTTATAP</sup>PVLSGSLDPLY  
CMRDIAVAQSA<sup>APASP</sup>GGLLDAGVLGGQTTTGRGRGTYRQQAVTSYSDPLERAWHLHIMRFLVESGMPFNC  
AKLESFKRMFTMIIPPGIPG<sup>APTP</sup>KLPTYHMLRTTLLDKLDAEVEKCVRPVLDMSREHGCTIMTDGWTNIRGQT  
LCNYLVGTETGVAYVATDVMRGKKDAHALATAWLNVRKSLDVNLSDITAFVTD<sup>SAGVNVAAMDVFQKDESIKH</sup>  
IFWIPLVTRFFKRHHAREILKGHSKKTLLLTQTRFGTNVIMMERLVDVRGELTKVIGQKRWRET<sup>VWSTNKIRKD</sup>  
ATEVTACIGSPSWWEDLIALYNMLKPIMDMLRLVDS<sup>TRLISKILRRYEVMIASCLSACKDIDRDQDAILEVFAR</sup>  
RRTMFRTPAHRAAMLDPFRDPTLIDDEVQALVEALVQFGYPEGSPQHREVR<sup>RANGKFHTGEPPFDDVT</sup>  
MRRAMDTFDHPASFLSSSAKFPH<sup>TAVFAGRIIRWVTGSPCERAWSRWSFIHSKSRNRLEVSRAEKLWCHW</sup>  
NLRLLDRPELHEDGTGERPDIFGKWLHYWHAVEDEV<sup>PVDHQLVRGSGAQVMVTEEDLTHARERLCAVSCMG</sup>  
VERRVAKSDRRRRRSEGRGRAVAEGATRGDVRAGARTRRRRADDFVRKARVRWDEGDFLD<sup>STSSNDDDDFFA</sup>  
GGGGGGEGGGGGGGGSDSGEGGGGGGGGGEGRGVDGDVGHGGHTMTRMPAIVLKR<sup>LRRGGRRDDSIAS</sup>  
RVRRPRVHVATRTEAHVMQQDPVVMSEDDMGDHPASLAREESGAVVTRPR<sup>SPEPA</sup>VGTAKDTQLHRMPST  
DVVMGEDGAPRAEVASAGVGLQDGEAPPPPTTGGGLEDGEVAHTPACAQDGL<sup>ESLRYSEEVAVHVASCGYR</sup>  
AEDIRDTLAGYPDR<sup>LQQGVGLHCPPDSLPRTELLAIDAALAGLPEILILISLSPDV</sup><sup>APPKAAP</sup>LDETHHDTGSDA  
VGGDKRLLPSEVRSSPAGFHVGGPW<sup>TVEQGLADEVARNRHGGPRVAAQ<sup>RLGESLEAASTDHVAPGGRGSQ</sup></sup>  
DFSDGGS<sup>LVPARAAGQQAEPHLSPTAATEADQSRQMSAAADGQAGADGGDGDGPGRGEKRRGGWSIIHD</sup>  
DNSTAAEASETTGADDPNDSDYVPRFRMADGDDGGGRRVSAMAAAVSVATATLAILLLAP<sup>FSVAAEVDTSAG</sup>  
DALISAITNHCC<sup>LKKFYALQISRVESRLRDSVNQGPITVFAPTDD</sup>FSMKLDPELWRCATTGQGPLD<sup>VLSQIMLY</sup>  
HFVTSGNFTAEEVATKTQ<sup>LTSASGMPIDVKDVNGNVVLEGYASITGPDALKSPNATVHLIGELLVPE</sup><sup>TIVSTIENV</sup>  
CRPGPV<sup>SASLPSPGL</sup>\*

>CHBRA246g00120

MAAAVSVATATLAILLLAPFYVAAEVDTSAGDALISAITNHCC<sup>LKKFYALQISRVESRLRDSVNQGP</sup>IVFAPTDD  
FSMKLDPELWRCATTGQGPLD<sup>VLSQIMLYHFVTSGNFTAEEVATKTQ<sup>LTSASGMPIDVKDVNGNVVLEGYAAIT</sup></sup>  
GPDALTSPNATVHLIGELLVPE<sup>TIVSTIQNVCRP</sup><sup>GPASASLPSP</sup>GL\*

## Liverworts

*Marchantia polymorpha*

>Mapoly0101s0015.1

MKVLSACLLTLVLGIVQQSDAQACTTTIYKSLT<sup>GQLSSLKMVVDAAGLADTFDD</sup>SALNVTVFAPNNAIQ  
GLNVNLNASGLTLANVTGNNNKAASIVLYHVATLVATSTQLVNDQSLPTLYGGYNLT<sup>VDRNATNVEIDGGA</sup>  
DTQATVVPDVRVCGSVVHIVNAVLLPQELNDITNY<sup>VPPVPPAPGTPPTPPGTVSP</sup>PPPPPPGGAATRVG  
SSVVMGGFAAIAVVLALV

>Mapoly0097s0014.1

MAALSGLALVLCCLCLGAAPP<sup>GASPAFAAAAAGASANADVVGNAGSGSVLQALLESQYSEWMELVEQAA</sup>  
MLHPLEELVGSGRKL<sup>TIFAPQNHQLQPKIKSFLLKPSNAIALKR<sup>VVQYHVL</sup>SERV</sup>TASEWPTASFTTLASEAV  
WLSTQGPILMAGDVAVAAPDAIIRPDGVVHGV<sup>EEMLIPNSVMQEYVAHTTRKMAT</sup><sup>TPLPTGAP</sup>GLDTRR  
AQLLEKQFS<sup>AVEAKLVVAAA</sup><sup>SPSLPPALALAPSIAPAPGPAMGPSTAP</sup>WLGFGDDEVTTFISAMLRFGGYS

EFAGLLVDLTSLGSEISKLVNMGYKLTILAPDDKAWSGALTEEHLSSQTALEDILHYHIITEYQTEESLYSTLRR  
MGKTHFSTLRVPHKLAAHEVDGQVVFEGEGDDAAGVFDHDFADGRLSVQGIDRVMIPAEKATLPDSTT  
VSPAPKVVKAKARNLVEQTLQLPGSSSATVNAGPG[SANGATVCLALAAGAAVLVNLAL

>Mapoly0095s0061.1

MGVRSPGVVVVRTMTIKRSPKQFRAGRQVQLGIYLVAFVLVGLVKIDAVEAQV[VSPSPPLRAPAPSAIP  
PPPPLTALQQSQAQAVQALRANNFTTAAQLIQTYLPILRLNSTLFFVPTNEALSSLSMVPVNLNILLYHAATPQY  
TFDQLVTLPLVGTRLQSFANESVLITNNARNNFQVDNVRIVLANVCASNTTDLQISCHGVESILNSTLYGNS  
APAPVSS[SPVAAPVPAFTPAASPPVPFILGPAPVPSGSPPESSIPAAASPTESSPTGGASACRVRILYIVFLGV  
MTLSYNL

>Mapoly0093s0009.1

MGRGNAGLSLLTIVLLGLYVASTTAQTTPALNITSILAKYPRFSVLSDLVSSGVEKEINSRTSITLLAPADAVLT  
AFQASVPNADTVKIADLLRYHVLLQYFDMTELKGLGTVNYSSVTLLQTTGRANEQDGFVNIYNTATQILIG  
PAASASASNATVVGTVLEDPPYDISIIEIDQVLKPAAGFDAVEGDVTVLESFQT[FSLFISYLKATGVDGVLATRQ  
TSGGLTVFAPRDSAFNALKSGSIQTLSPGKQKLLMQYHALTQYYTMTNFLSMVDAPVQTVSSTVGGGYL  
MNITSKASTVTIKTGVGNATVGEVLYNANPVTMYAIDKVLLPTELFG[TPDQLSPA[EAPTPTPDAA[PAPTPKA  
SAPVPPAAETPTILLEPEVPPA[STNPN[AA[SVAGVSGALSAAVLIVSSIAAFL

>Mapoly0075s0013.2

MARSAIALLVLVLASATQLNAQAACNTSIFDAVAAT[PDSL[LLGQVVQAAGLTETLSDPTLEVTVFAPNNAA  
FEELLQVLNSSGLTDDVTAPESNKAASILYHVVPVAALSTQLSDMQVLPTLLGKNLTVSLMGGMVNIIAQ  
ESNATVVTADVTVC[GSV[VHIINHVLIPAAALADIPNYMPT[TP[TP[TPPAAMTPPAAGSPPGTPPMLAS[PP  
PDKY

>Mapoly0075s0013.1

MARSAIALLVLVLASATQLNAQAACNTSIFDAVAAT[PDSL[LLGQVVQAAGLTETLSDPTLEVTVFAPNNAA  
FEELLQVLNSSGLTDDVTAPESNKAASILYHVVPVAALSTQLSDMQVLPTLLGKNLTVSLMGGMVNIIAQ  
ESNATVVTADVTVC[GSV[VHIINHVLIPAAALADIPNYMPT[TP[TP[TPPAAMTPPAAGSPPGTPPMLASPPP  
PGP[DN[GAMKASSSVAMGVVAAALGIFVALA

>Mapoly0033s0033.1

MVGMASYRAAPGIYCALLCLDFLMVSSQ[SPTVAPSP[TTTPSAPVTAPPSPAALPPPAIVPAPAPA[AKPQP  
QVVD[MIEALRDAGQFGAIAGLLDGLQMKNLTPMTTWLLPNDEAFSGTSYPKNVTKFIDYHVIRQLLPYSR  
LSTLSVGTRLPTFLGSETV[VVTSNLRFNYSLDNAMIVVPDLYSDSTVAVHGINSVLN[DYLFNEGVS[APSPGE  
SPSGVPTAGPPSPSSSSSPTTPGESNPITLPA[AAPT[STSTSLPVSFGLILIVAMLIV

>Mapoly0027s0087.1

MGP[RAARSGLMALALLCCIVGTCSQSTHKFNITKMLSGHPRFSVFREMLSSHGVAAEINGRKSVTLLAP  
ANNVMRAFRTSNNKTDAKITDLLRFHVLLTYFDMAELRALKTTNYTSVTLLQTTGRASGNNGFVNIYNL  
KSRVKLGPSVPDSSSNVTVLAGVQKSPFDVSIIEIDQVLLPVGFNNASGDLIAVLDSFQ[EFTLLISYLQETKVD  
AVFAEKQAEGITIFAPRDSAFNSLATGSIQTL[SLSEQKLLLEYHALDGYESLDSLETMLNKPTKTLASADAAGY  
ILNVSATPGQSTVRLRTGVSVATVLEIYDANPVTMYAIDEVLLPLNLF[TPAPLASPAPAPAPKSAVKSPPAH  
KVPATVTP[DSASLAERSLLVTMAALISSTLAVIL

>Mapoly0027s0084.1

MASGRTALVASVLLSCIIVSSAFNVTTMLDKF[PSFSEMKNLLSSSGVAEEINSRKSLLALSNDVLTAFASN  
PNVDAVKLADLLRYHVLLQFLGMDDLKALPTDNYTAVTTLQTTGRANDNDGFVNIYNLPSGILVGPSVAG  
SSSNATVATNITNEAFDISIIQINSILTPVGFNATGDLIKVLETF[KDYTMFISLLKDSGVDSIFAGRQTGGGIVT  
FAPTDSAFNGLTSASLQALSVDLKLMMQYHALTSYQPLDILQNMVDSPVSTIASYGLLNVS[SAVMTV  
TLHTGVNDAKIETLYDARPVMTMFGIDAVLLPAELFSKDAL[VPTPAEAPVPEASAPDA[PEA[APGPEKPA[GS

PASVVKMSVALSAVAMIASSLVAAL

>Mapoly0027s0081.1

MASGRTALVASVLLSCIIVSSAFNVTTMLDKFPSFSEMKNLLSSSGVAEEINSRKSLLALSNDVLTAFNASN  
PNVDAVKLADLLRYHVLLQFLGMDDLKALPTDNYTAVTTLTQTTGRANDNDGTFVNIYNLPSGILVGPSVAG  
SSSNATVATNITNEAFDISIIQINSILTPVGFNATGDLIKVLETFKDYTMFISLLKDSGVDSIFAGRQTGGGIV  
FAPTDSAFNGLTSASLQALSVDLKLMMQYHALTSYQPLDILQNMVDSPVSTIASGYLLNVSSAVMTV  
TLHTGVNDAKIETLYDARPTMFGIDAVLLPAELFSKDALVPTPAEAPVPEASAPDAPEAAPGPEKPAGS  
PASVVKMSVALSAVAMIASSLVAAL

>Mapoly0027s0080.1

MASGRTALVASVLLSCIIVSSAFNITTMLNQFPSFSQMNQLLSSSGVANDINARKSITVLVVSNDVLNAFTA  
SNPNVDTVKMADLLRYHVLLQFLGMDELKALPTSNYTSVTTLTQTTGRANNNDGFLNIYNLPSGFLIGPSV  
AGSSSNATVAANITHEAFEISVIQISSILTPVGFNATGDLIQVLTGFNVYTMFISLLKESAVDSIFAGRQTGGG  
ITVFAPTDSAFNSLASGSIQGLSVSDLKLMMQYHALTSYQPLSVLQNMVNSPVSTIASGYLLNVSSAAK  
TVTLHTGVSVATIQETLYDATPTTMFGIDQVLLPSELFKAALVPSPA EAPVPEAAPGPKEAKAPGAAPDAA  
PGPEKPAGSTASVVMSVSVVSAVALIASSCLAVAL

>Mapoly0027s0079.1

MASGRTALVASVLLSCIIVSSAFNITTMLNQFPSFSQMNQLLSSSGVANDINARKSITVLVVSNDVLNAFTA  
SNPNVDTVKMADLLRYHVLLQFLGMDELKALPTSNYTSVTTLTQTTGRANNNDGFLNIYNLPSGFLIGPSV  
AGSSSNATVAANITHEAFEISVIQISSILTPVGFNATGDLIQVLTGFNVYTMFISLLKESAVDSIFAGRQTGGG  
ITVFAPTDSAFNSLASGSIQGLSVSDLKLMMQYHALTSYQPLSVLQNMVNSPVSTIASGYLLNVSSAAK  
TVTLHTGVSVATIQETLYDATPTTMFGIDQVLLPSELFKAALVPSPA EAPVPEAAPGPKEAKAPGAAPDAA  
PGPEKPAGSTASVVMSVSVLSAVALIASSCLAAL

>Mapoly0012s0106.1

MGRTRAGSVVAVLLLSWMAVASAFNITLMLNARPSLSAMNQLLTSSGVAEEINSRTSLTCAVSNPVLQA  
FVATVPNVDSGEVADLLRYHVFLQYLDIPELKQIVPGSPSTVTTLLQTTGRTAGNDGSVNIYYDGTAIQVGL  
PDITAPPNATILSSIASIPYNISIVQCDKVLVPPGFGTRATDNANITAAL EAGLNYNTFIQLIQSTGIDAEFAAK  
QTGTGITIFAPTDAFAALPAGALAALTPDQAKQVLRHAIVTYYPLGTLSTMNKPNEPTLATTGGPGTYT  
VNVSTSTGGVTLSTSVSSSRIGATLFDTNPTAIFSIDNVILPAEIFATAPVPSPAVAPAPLTPGLAPAPLSPVPA  
PAPGTPVPAPAPAPLTPVPAPVPTPSSTPAPAPAPMTPTPAPVPAPDMASPPAPPEEIPAIETPAETPADTPS  
SASSIDMSRVVLAAVTLFSGLMML

>Mapoly0194s0008.1

MGRQKTVVPSLVGSLLLNTFTVLTWAATFNITSIFDEFPDFSIFNQLLTDTRVAGEINRRQGVTVLAPSNEAM  
TDFRSANPALEGDRVANLLRYHVLLDFLTQNLQRLDIANYTRVGTFRRTTGPANADDASVNLNTPSNIFI  
GSSAVDSSQNSTVISTVFLQPSDVSVIMIDRTLQPVGFETPRGAANITGTLDLGGYSIFVSLTQTGVDVVF  
GGRQSGEGITIFVPTDEAFNKLPGQWFEAFELKEQKLLLEYHALTRYNSLDALWRYRDKQVPTVSSTVQEG  
PDAFNLLVTANKGLVTIHSSTPDKPVATLQSTLFDASPLVLYSIDEVLLPVELFGDVMAVPLTPPAPPAPACA  
AAPAPAPSPAPPPPVPKPKRPVPPAPPSPPIASSAGADSPLGSLPLALLTAVLRFSRL

## Mosses

*Physcomitrella patens*

>Phpat.016G034100

MGSRGMAAVGYLGEAGGGGIAAAAMDWRWRKIGVLSMLMLVWCGGVEGFDAGVGSNKVIGLREVRL  
GTGSVLQALLDSQYSEMVLYLDKADMLEELEREVL RQKAITLFAPKNSHLEQLDADLGRFLMRPGHEEYLR  
TVLRYHVIPGRVEGADFQNRVTETLSKGDVVGLRTYGLKRYVGLLRVFPNSIVRKDGIVHGV DGLMVPPK  
VASAFEWKRNGKSGVNPBGSPVTLKRSRKSSAGAKSAPKARYMLERSAPAVPAALIHAVTAPAPPATAPS

LGPSLGP<sup>SI</sup>APAPGP GTAMFNWDDDEMLQFVTALSNYGGYNDMAELLVNATTLGVELGKLARMGYKLT  
ILAPNDQAMQLLTTEQLNQAMEPLLYYHFLSEYQTEESMYNAVKRLGKQSYSTLRHPHKVVASESDGTVK  
FGDGDAAHIFDHDIIYVDGHISIQGINRVLTPPP

>Phpat.025G021800

MVVSWSGLGVEGFDPLESKRVIGLREVRLTGSGVLQALLD<sup>SQYSEM</sup>VLYLDKADMLEELEREVLRRGAITVF  
APKNSYLEQQVDADLWRFLMRPGHEAYLRTLKHHVIPGRVEGADFQNRVETLASGNVVGLRSHGLKR  
YVESARVFPNSIVRKDGIVHGLDGFMI<sup>PWNEK</sup>PRGSPVSRKVSRSRSGTKSASTTRYMLEKNAPVVP  
DALLRAVMPPPTTSVT<sup>APSLGP</sup>SLGP<sup>SI</sup>APAPGP GIAGFTWDDDEETLQFVMALTNYGGYNDMAELLVNAT  
TLGIEIGKLARMGYKI<sup>TILAPNDQAMQQLTIEQLDMPMEPLLYYHFLSEYQTD</sup>ESMYNAVKRLGKQSYSTL  
RHPHKVIASES<sup>DGTVKFGDGDGA</sup>AHICDHDIIYVEGHISVQGINRVLSPPP

>Phpat.001G016800

MAGVNLFPSLRGAQLVFNTMVCFTLLLPLALGTVASESLVTAAASK<sup>VP</sup>AV<sup>PV</sup>PAP<sup>VR</sup>APAPAP<sup>KILT</sup>LHEKV  
VTSLSRAGHYGAIAGLD<sup>SLPNNNI</sup>IKTGM<sup>TLLAPNDNAFSN</sup>VLMNSTTYLTLLTYHGA<sup>AKVYSY</sup>EGLNL  
PVGTKIPSTAANVVIVVTSNSKGAYKLDD<sup>SQIVDPDIFVDNTVAVH</sup>GIDNVL<sup>NTAKYN</sup>KGV<sup>APEA</sup>APAPV  
<sup>DASPI</sup>APARAG<sup>P</sup>PAP<sup>PGSIVN</sup>PGSGGDATD<sup>GPSY</sup>SPD<sup>STP</sup>QLINPNGASVVPKSSLLDVSLIALWFLIPVL  
AW

>Phpat.013G027300

<sup>MAGSHFF</sup>RPGANAWVLLASIVCCALLVSAE<sup>LADD</sup><sup>SPTKAAIAA</sup>APAP<sup>LIG</sup>APAPAP<sup>V</sup>AP<sup>PPKPL</sup>LHEKVVA  
ALRAAGHYGAISGLD<sup>SLGEASSII</sup>KEGV<sup>TLFAPDDGAFSGLN</sup>LNSSKLLMTTLDYHVATSVYNYNQLSTLPL  
NSTIKTSVPDVVILITSTGTSGRLDNVAISDPDLYVDSQIAVHGISA<sup>VM</sup>DTAKYNKGV<sup>VP</sup>PEA<sup>AP</sup>PLATNP  
<sup>SPAPGLIT</sup>TPTTPRTAS<sup>P</sup>AGTGN<sup>GAAH</sup>VLTNIVSTM<sup>LLVSAV</sup>SFLIAL

>Phpat.003G016800

<sup>MADSR</sup>CAWMILASTLVCGLLFAVLA<sup>KD</sup><sup>SPSLAAAIAA</sup>APAP<sup>PVG</sup>APAPAP<sup>V</sup>AP<sup>PPRPL</sup>LHEKVVAALRA  
AGHYGAISGLD<sup>SVGATSNVIREGV</sup><sup>TLFAPDDGAFSGLNMNSSSLLMTTLDYHVATSVYNFN</sup>QLSNPLNS  
TIKTSAPNVEIFVTSTGTDGLRLDNVAISDPDLYADGQMAVQGISSVM<sup>DTAKYN</sup>KGV<sup>VP</sup>PEA<sup>AP</sup>APVAGD  
<sup>PAPAPGLIT</sup>TPTTPKTAT<sup>P</sup>AGLTAKRQG<sup>FVKYLNFTSTLFTQKGRDLAVYRNDANQGVINGSMKK</sup>LGD

>Phpat.026G042300

<sup>MSARLIS</sup>LRAGVWLVVASTLFHTLVASAAA<sup>ADD</sup><sup>APSLAEAILAAA</sup>APSP<sup>FIG</sup>APAPAP<sup>L</sup>AP<sup>PPKPL</sup>TLRDRV  
VAAIRAAGHYGAISGLD<sup>SLSETSVIKEGI</sup><sup>TFFAPDDGAFSGLNMNNSMLFMNTLHYHVATAVYSYQQLSY</sup>  
LPLNSTIQTAAPNVVMYITSTGEDGLMLDNVVISDPDLYLDDKVAVHGISMVM<sup>DTAKYN</sup>KGV<sup>VP</sup>PEA<sup>APA</sup>  
<sup>AVAGAPSAS</sup>PLTTTPTTPGTT<sup>SP</sup>AAVGN<sup>AAHV</sup>VSSAANAAILVA<sup>AVLFLSLL</sup>FQI

>Phpat.021G037400

<sup>MVAMASSA</sup>ALRSYVLALLVVM<sup>AV</sup>PHISA<sup>QQCNTN</sup>LLEAVRAQ<sup>PSLSILADVIEASGLAEQLSMTDN</sup>VT  
LAPDNNAFNGTGGLLSILAANNLTLEQVTAPGSNRAASILLYHIVSPATAADLTGQTLTTALGKAYELTVD  
KTATPTVVVSFIGAGSNATVITADLRVCNSVVHIVNTVLLPATT<sup>LT</sup>AIPIYNLEP<sup>SPSPVGS</sup>PGMS<sup>PAPT</sup>GN  
<sup>VVPGSPTAPTAS</sup>VPGSP<sup>PES</sup>GADSSFTAGSAVVALSAVALAMIM

>Phpat.019G005200

MEFCLFRLVFAPQISNCSCFDLIQECDDTLSCALFPRLSRLTMALSSVSRCLVLVLM<sup>LAVVPQ</sup>AYAQN  
CNTLLAAVKAD<sup>PRLQQLAAVIEAAGLADTVERLVNVTIAPDNNAFNGTNGLLSLLRQNNLNLT</sup>DVTAPGQN  
RAASILLYHIIAGPARAADLKNNQVLTFLGPNYTLRVNKQTAPT<sup>LIVSFVGTGSNATVTAADVPVCSSIVHV</sup>  
<sup>VNNVLLPATNLT</sup>AI<sup>PAYTAPGA</sup>APGSPPGSMVPTPPGSQ<sup>APS</sup>GSGASSLVGSMAFALSVAVA<sup>AVLMN</sup>

>Phpat.007G002900

MHRRRLFQSSSLRPPDCALLLQQCPPSCALSQQATR<sup>LTSFSTLPTSS</sup>ESSLKSSLP<sup>SAHRFS</sup>VGDWRYQELT  
MKTQAV<sup>ALVGLLLGLT</sup>SITTAQ<sup>NISLV</sup>LARY<sup>PEYSTFKSLMESTAVLSEVQTRSS</sup>LTILCPPNSVLD<sup>PFIARR</sup>

SFSTQMLADVIRYHVLLQYLDLSDAELRTQTNNGGMFTTLYQTTGRANELDGFVNITVTPSNAVAAGPSTAG  
TPPQATILENITQFPYNYSFRVDVAVMTPLGLAAAQLAPTTPTVAPVPAPLVAPVVAPVVAPVVAPVTAPA  
SVPAVAPSAPVLAPVVPSPMAPPTASPEPSLVTPTPAPSTTPVVSPAASPPAPPTNGPSADETPAVAEPTTS  
PINANSVSVNIDFVAALASLFVAALLS

>Phpat.006G011100

MKCVGGTWHRGNTVDCRRLHLHLRHAILCIKLIFYSYAATRATAQGLAQESVDSILQSLRAAGLTSSADAI  
QAAVISGSITLPSSNFTIFAPVNAQVDSILPSNPDLKVLNYHLATTDLPKALLLLPIGQRIPTLLPDNTLLVT  
DNNLANYSINNEQILYFDLCTVYTVSCHAVSGILNSTIWGQASLIGPATSPSAAPAGAPFIAPFAAPIGAPYTS  
PAGAPYAPPPESALPPVIGIPPTVPGAPETPPGIIPPTVPGAPETPPGNIPTAGSPPPPQDRAAAATALLIS  
VFFI

>Phpat.004G062900

MGSSKMLVGLLALIALAVEVTSQDCTTALNEFPQFSMQKDALISSGVADALKGMNTLTLLINNGAFGGYL  
GGHSTYTPQMVSVDLVKYHILLSYFDTETIKTVSTMNDGVVTTLYQSTGRANGMDGFVNITVSPTDGVVTI  
KPSIPGSTTQATVVSYPKAVPYNCYSIEISNVLEPIGLAAAQLAPTSPPSPAPVAVPAPATVAPTTAPISTPTTA  
PASAPVESPTAVPASAPVDAPASAPSNAPVDSPVSSPPAPVEAPAETPVETPSETPVSTPPAASIEGPAMSP  
QSPDSAYSRLRLNATLLVSAFLGALFL

>Phpat.003G041000

MMAYQRGKKEVSALVLLSCMSACTLAIALNEEDSRGIGAGKFNPNHAPVITGSSHLKSELHQDVVRVLRVTQT  
YSAFAALLDNMTESVIRQGITIFAPNDGALSDFHKRKTQEHLNLRVRFHIITPLPFSNLLRMEAGSRLKTAVSNFT  
ILVTNNTTKDAYQVDDATIIDPDLYTGATIAVHGINAVFNTTKIGEGPLPENPKLGNEAPSETTPGGIVVSGSNSGSG  
GKRSKYGSFRIPINVEGVPFHDYLMFVVMMLLQYFTVAI

## Lycophytes

*Selaginella moellendorffii*

>15418660

MGGRGSSRVTLTALLFSALFLARLEAQVPIPIGIGGGGGGGIPIGGGGIPIGSGGIPVGSLLPTIPPAIAQSIIDTL  
RTGGFSLAGWAIKALSNFIPAYSTLMIPTNEAIAAFVNLNQSEIPSLLYHAVTGVLPHYDLSEFPVQGRLPTL  
LFGNQLVVTDNSAAGYRLNTRIVRPNMCGNSTSVVTCHGIDRVLNPFSLASANGPASGPSGAFAPANA  
PGGMPLQRPPAFVPIGPAIAPGAPPVTVNVAPAGANETGGAAASSTARCGPPAPAACVALLLSALYCSFVSI  
R

>15409766

MGVADAPSPGNVPVLGDMKNRSAAEMKISVLALRALTLVLLVIALALMVSNNKQTSIPIKLPGMASITFLK  
KTATFSQITGVQYVVGALSVAVAYMFFQMLAGLFTILTGSIVGSKSRAWVTFILDQLIAYLMVSAATVVAEV  
GYIARRGETKVGWNQVCSDFKHCFIYGFSLVNAFLATIAFLPVAVSAFHLFRMYGAQSAQSKKYGALHA  
CMRRTGRSYKPLLSQLKDHIPVHPSSRAERAMESRTLVLVLLFVGVVTVIVSSGLERAAAQDDTDDGILPSSD  
VQPLVSNMIGQGFTVAAAVAQSLQTLPIRSTLLIPSNNAIAGVDANLSQEDIINTLQYHVLTFTPTSFEALSR  
NDVGAELPTMLQGEMITVTSNPGNFTLNEVNITHPDVCSSTRFIACHGIDRVLAYNSSLVTAAGPEASPP  
FGAEQASPAPEALPPGTRSPNNTANPSNRKSNSTSGVSLRHSFTSGVAFIEVLAASWLLM

>15417822

SSSSGDSLPISSKSGSSSSSVLAALMESQYTELMELMGHAGMLEPLEKVVGKGSITIFAPRNAYMEQQVDS  
EFKHFLLEPGNIKHLRQVLKHHIVPGKIMSEDWSNRTVRTSTETVRIHSHRGINRVELSEVTSPNDINKKD  
GVVHGVNGLLVRSPVQEAHSVKKLGSSANALLPQASPEFDPLGASLAEMSKEFQDFLEAAESPLPLEFAYAP  
EVAPAPAPGPGSSGKHRVYTWEDVDDFVSTLANFGGYNEMAELLVNLTSAWDMAKLVNEGHRLTLLAPN  
DHAMDHLTTEQLNAPGGLEAILMYHVLTEYQTEESLYNAVRRFEKVKFLTLWQPHTIAKETDGTQVQFGE  
GESGALLYDHDIFTDGHISIQGISKVL

>15418372

NSTRVLAKF **DHLSTFNRYLSETGVIKEVDSRSSITLFIPPNVLDPVIASVGANNLLVIADILRYHCVLQYLEIKE**  
**IRSMTNAT**GIVLATLYQTTGKPTGEYGFVNVSVSHGGLIHLGVPGAASNATVVKVNTQHPYDMSYMELDH  
PLMPMDLGIDQGAAPSVNNLTAALKAK **GNFNTFLGLLASTGVDKALRSMSAVTLLAPDDDAFKALPPNA**  
**LAELSQAQKIALQFHAIATYFTMGSLRSVATPLPTVASSRIGGFELNVSTAGGKGVSVFTGLNRADVTDTTEL**  
**DTPPVAVYAVNRVLLP**PEIFAL **APAGAPGPALSVAPSLAPELSPAPTGPSSSPSPSPSPSPSPESAPSPSPVM**  
**VPAASPPAPPSSETPSSSSAP**EEAA

>15419255

ILASTLAAHSTAQLTATTNPTSVLQNR **PDFSTFSKLLTDTGVISEINQRSSLTLLVPHNSALDAVLNRSSPSSTP**  
**LPLPVVADVLRHCLLQYLDVPQIKSMTN**ELGMLVTSLYQTTGRAAGQNGFVNVSVSSDGQIHAGLPFAA  
TSLATVRTNITQFPYNISYMQIDQALVPEDLGRPQAAASSILNLTNTLQRS **GKFTTFLNLMQSTGFTAALATL**  
**PAFSLFVPTDEAFQGLPNGTMAALSPSQASSLMAYHTLPAYTSSGSLQRQNSLVQTVASNGDNQKFLIQV**  
**APSGGNSGGVSLSTGVDTADVSTIYDQPPTAAYSVNRVLLP**KEIFEHAA **APSPSPPLVAPLPPPTQVPPSSSP**  
**LPSPSPAP**TEASFPLPSS **TPSPAP**

>15417283

MSVEQQHRQASLALVCSLAAMAIILPWASLCGAQNVTVVLENSAPVNT **NFSTFSRLLSMTNVTAEINSRS**  
**SLTILVPDINSILDSYVGANLEGMHVWAVADFCRYHVLLQYLDTQEIMQMTNQSG**LITTLYQTTGRAEGID  
GFVNMFTGNDIQFGLPPPHASGPVATVLN NFVRYPYNMSFMMISKPLMPVRLAQMNRPDHFPSISNAL  
FKGNI **YKTFQKLMQDTGTAAAEDIEHQPTSGVTVFAPTDSAFQNLPSGSLAALTQSQRQLLVRYHLLPSF**  
**FTFGSLRTLKAPLTLTATSNRNFEVNASGEGPSGGLAIATGVSTANVIATLLEDDPVGVALDAVLLP**PEIFPL  
HS **TPPASIAPSPAPPATVPPKAVQAPAPAPKAPPPSPSSSPSPPPSATSP**PPVQSSSNSSSSSSSS **SPAAE**  
**NGTSAEAPVAAEGP**LAERSDARKFGLGFTTRYWDLEHSLTPAHLSTNARVVDHSKTVETSSEMPAVRGR  
EEAGGARSAAATGRIASGRLEGQLKVTREDEAGRGEDEANGDLRRARPWWDEASAAMPCYDFNRI

>15401851

AVAAILAIHNARSIGAAASVDHPPAPSSGAGNVALKSVLAALLES **PATEMMELVEQAGMLEALELAADRH**  
**NLTIFAPRDEFLELHFDADFRRLLLPGNVRFLLQELVMFHVLPITASQWRSGRFQSLSGSRDEVLLHWNK**  
**KQRLAVDRSTVDWPD MIVRSDGVVHRIDGLLV**PKSVQDAYAAARISSSAVLPPQAAPSLSGESFGNKA  
LHVTFPVIDDLIGS **APAPAPSP**SRFSADGHGRVQDFIAALVSIGGYGEIADLLVNLTSLSVEIAN **LVNEGHAL**  
**TVLAPGDRAVARLAAEHLGAIESILAYHIVA EYQTEESLYT**LAKRHDRVVLSTLHEPPFNRLVAREIDGTVEFG  
SGNDLASSNSSRSSTGLLMDPNIYTDGRISVQGINAVLIP

>15413899

MEQHKQAPLWALLLILASGLITAVGLTKNLTLLNNY **PNFKRFNTLLTSGVVDQVNPMLTATLFI PENNTL**  
**LNDFIYDMGKHPSEEKLADLVRYHISDFYIESEFLAVRRNFSSPIKTLFRERPYEETLHFRWLQLNVDNHGVA**  
**TLRPPHQSPPLATILRN VVQEPFSITVY AIDRVLEP**EGFLPPPPPPPP **SPPPPSPPPPPPPPPSPPPPPSPPP**  
**PSPPPPPSPPPPSPPPPSPPPPSPPPPSPPPPSPPPPSPPPPSPPPPSPPPPSPPPPSPPPPSPPPPSPPPPSPPPP**  
**FLPESEDGIPPPQS**

>15404663

SINITQVLGLF **PDYTNLMMLLLQTGVANEINQRSSLTILAAEDSVLDPILDQLAQSVTGQQIADILRYHVLL EY**  
**EGINDLRSLPNKSKLFTTLFQTTGRASNAGFVNITDDPNGGVSVGWPSSSTVFSSEILGTVKELPFNVSVV**  
**DVSRVLVPYGLLPPSLMPLFL** **APSPPPAESPPSPSG**

# Gymnosperm

*Picea abies*

>MA\_216501g0010

**MGRFSPAVQAKSSQFFAFFVAFCIILSVQNVNS** **SPSSPPPA**ISSNSILVALLD **SRYTELAELVEKASLLQPLEEV**

VGNNNITILAPQNAHLEKNLDPEFKRFMHEPGNLSLQRLQLQSHIIPRRITAEWWSNNATHEALSKDGLQF  
SVKENNIKAVDLAVLTRPNAVVRPDGVIHGIDRLVLPKSVQDDFNAWRRGVVLAVKPEGAPVVTKLSTLAS  
VNGRQSPVLVTAPVSYIAMAPGPSLAPAPAPGPSGRHWFDGESQVKDFIDTSLFGGYSEMADILVNLTSL  
ASELAKLVSEGYRITVLAPNDEAMGKLTTDQLSEPGAPEHIVYYHIIPDYQTEESLYNAVRRFGKIKYDTRLVP  
HKLLSKEADGTVVFGEGEEAAHLFDHDIYDGRISVQGIDKVLFP TQQAGTSSHGNKGRKLEEQATAQRRG  
RLIGSV

>MA\_43595g0010

MRVATQLKYVSRTDDVAVDVPAKPPVGRPSQGDGSTAKSLQNKHAGKQNSSTQVSAISSNSVLVALLDS  
HYTELAELVEKALLQPLEEVVGSSNITIFAPNNVFLEKNLDPEFKRFLHEPGNLSLQRLQLQYHVVPRRIVAE  
EWGNETHHALNRDGLKFEMNGDGRKVDLGAVIHPNAVVRPDGVIHGIDRVLPKSVQDDFNAWRRSGV  
VLAVKPEGSPVVDGPYQKKSVSGLKLYSSPPVHSIYYALAPGPSLAPAPAPGPSGGHHWFDGESQVKDF  
IHTLMLYGGYNEMADILVNLTSLASEMAKLVSEGYRITVLAPNDEAMGELTTDQLSEPGAPEQIVYYHVIPE  
YQTEESLYTAVRRFGKVKYDTRLIPHKMVTQEADGTVMFHGETTAHLYDHDYVDGRISVQGIDKXXIYV  
DGRISVQGIDKVLFPQEAASRHVKGRKLEEEQKEVEETKKPSKGRSLGALCNLLERFGRNSLLSGCQ

>MA\_10051181g0010

MGNQRNAAEREKSHLPAVLWLYVVIWATSNIPGCAAATRNPAANFTARNDRMENVIETMIGAGDFGG  
WANVLLAMDPAVLPTKATFFVPSDDALSRLPVQAEFTSSILQYHIIPQQLSSYDLQRLDVGMRPLTLLANQ  
TIVVTSNTQPNYTVDDTLVTHPDIFYDGTFAVHGVADLLNFTRYGVDLDTPRPLGDAVPAPDSVEALTPVP  
DGNSTTGSVLPRGSGSQSDAPCLCKEFPVALTAASVVFVIRFLRFPLR

>MA\_153279g0010

MLTTGSRHSFYLRFYASQRTNDRSALSSPPFTTNHHESSLRFESWRAALIKKIAMGNQRNAAEREKSHL  
QAVLWLYVVIWATSNIPGCAAATRNPAANFTARNDRMENVIETMIGAGDFGGWANVLLAMDPAVLPTK  
ATFFVPSDDALSRLPVQTEFTSSILQYHIIPQQLSSYDLQRLDVGMRPLTLLANQTIVVTSNRQPNYTVDDTL  
VTHPDIFYDGTFAVHGVADLLNFTRYGVDLDTPRPLGDAVPAPDSVEALTPVPDGNSTTGSVLPRGSGSHS  
DAPCLCKEFPVALTAASVVFVIRFLRFPLR

>MA\_10437029g0030

MGNQRNAAEREKSHLPAVLWLYVVIWATSNIPGCAAATRNPAANFTARNDRMENVIETMIGAGDFGG  
WANVLLAMDPAVLPTKATFFVPSDDALSRLPVQTEFTSSILQYHIIPQQLSSYALQRFVGMRLPTLLANQT  
ILVTSNRQPNYTVDDTLVTHPDIFYDDTFAVHGVADLLDFTRYGVDLDTPRPLSDAAPASDTVETLTPVPDG  
NSTTGSVLPCGSGRLSDAPCLCKEFPVAFTAASVIVEVQVGAGSVSAQWEPRFQRNLITILKHGRGVGGVL  
QQTSICHHALNTRGDIQLHQFGTTGQAERGIADGCCGPE

>MA\_99914g0010

MNFKMGFVAVSMLVAVLCLPATIDGQSDLHPTNKTSDLQVAMEEMKGSSYYGFVMLLQMLQGEQLPM  
SQITFFMPSDQALAEVNLQVTSYISELVLRHSVHQPLKFHLLHFPTGTLPSSFPNYMLKVSNNGRNDFYL  
NYVHIVHPNVCRASPSISCHGVSGVLANASTDPYPGSPAGALPAPSPSSQPPPPPPASPRNSNSSPPSQG  
PSISNPPEQGPSIQNLPRSAVSPLSPISNGTGKNSASCMGLVYGSIFLLTWSTATFLAIAQP

>MA\_28601g0020

MDYQSPRSIIVAILLALFIAASNASALQKAGLPSNSSSSQVAINSNSVLVALLDSHYTELAELVEKALLQTLLEE  
VVGSSNVTIFAPQNDILERKLDPEFKRFLHEPGNLKALQKLLMFHVVPRRIVAEEWRRNGTHQTLAKDRLKL  
SMKGDKKTIDLASVAHPNAVVRPDGVIHGIDRMLIPKSVQDDFSKWRSGVSLAVMPQGAPVLDPIKKLSK  
SVAASSLSAKSPPIHSIYYALAPGPSLAPAPAPGSTGHYWFDDGESQVKDFINTLVLYGGYNEMADILVNLTSL  
LASELAKLVSEGYKVTVLAPNDEAMGELTTEQLSEPGAPEHIMYYHIPEYQTEESLYNAVRRFGKMKYDTRL  
RIPHKITSQEADGTVLFGEGEQSAHLRQPRSSASLEPRNI

>MA\_137299g0010

>MA 5116514g0010

VLIKGGCKIFAGLISTTGVIKSYDDSIKSSQDAVKKGLTVFAPTDGAFTDVIKLLKKLSSSEDKVSLKFHAVPSY  
TPLGTLKNTNGPVTTMASNYAVTVSSSGNTVTLNTSLSKATISSTLLDNLPLAIFTVDKVLKP  
KAPTPEPPTPEAHTPEASSPEAPAGSPADSKSSK

>MA\_10433947g0020

MSGFLNITDLEGGVVAFEVPGSNTVAAKFVKSIYSDPYNISVVQISNLIVSPGLLTPSIPASSVNISAALANTG  
HAIFARLITATGVLHTFQEIVDSGLTIFAPVDGAFDSVMTEIKKLSRAQQVSILEYHARPVYSPLGTLKTTDGD  
VVTTMATNGAERYSLTVGVNGDNVILGTGVNSAVITSTLLDDQPLVVSIDKVLKPSEIFAVA  
PAPTPALGFPVPVSSPHLVPVSSAPTPVSSPTPTPVSSPPVPVSSAPTPVSAPPPVPVSSPTPTVSSPPPAIS  
SPSQTIFSPAPPVESPLSLLAPSVAPSDEKAHSPISEKSSAFHVIGISVASMLAAVGHVVLGGIF

>MA\_44729g0010

MKINAMEYGRLIWSMITVMAIFCLSDANYADAMDESSIVHFQDRHDQEELVQILSNMGFTSLGMHLQS  
SQDLLVGLKGPLTLFAPTEEAFRYFNSPNSSSNSSSDYLLPYHIAKGLFTYTQLQMLPDGTLKLDIASEGSLLV  
TFNSRGDGDQDIYSSAQTIVDYRPVYVNGVLVSHPDLLNDGLLTIHGVDQPLPFLVLESSSSRRRKNYSSGI  
APPPAGAPALIPQSSSASP  
GIDHPMNIIMPFMLEDAELSLRNQGYSLALAMRIKSPPELLRLQNLITFTLSD  
SVFLKGGQDFTNTVRYHVVPNRRLLADLVRLPAGTRLHTLLHGQSLVTDNKPFSINHVGVKIPDAFTNR  
WIAVHEIVRPF  
ISSHHHHQM  
QGISNGNRSSDNDKHQGV  
MAGQELRK

>MA\_8251628g0010

MTAQADGYQFTDEEFMWVISVLRGWGYHHFANALQMVDITHLFSSGGSYTFFAPPDEALEALGSASKS  
WQEFMDAVRYHIVNVQLSYYNLKHLPDGARLGTLLRSRLTFTTFAPESNETLMVNNVSVSFPDLYDRR  
FAAHLTAVLNPSVDHVDVLSIRAFWIKDAAATASWDRVKGLHGKHAFPSKLLPVSSFSFKNTSVNLTH  
QEILTETGGHKEDSSTASVLEPAPSPCDEVAANGSTKEKEAISSKKTHQEILTESGGHKEDSST  
TPVLPAPAP  
SPYDEVAANSSTKVKEAISSKKTHQEILTETGGHKENSSI  
APVLPPAPASP  
CDEVAANGSTKVKEAISSKKVSE  
VIYSTSSDSPAALASPPRLKKFTLSLSVLSFSSPS

>MA\_10397539g0010

MEAVQCCAERLKINAMDYRRFSLTVITMLIFTLYGANYADATDELSSIVRFQDKQEEEELVQVFRNMGFPSL  
AMLLHSRQ  
NLLVGRAGPLTIFAPTEEAFRNFNSSNSSSDYLLSHHIAKGLFTYAHLMQPDGKKLDTI  
ASVGSIVVTFNHSHGDLSSSTQLRAEYRPVYLVNGVLLSHPDLLSDGLLTIHGVDQFLV  
LESSSPASAPTSAPAA  
PASAPASAPAPAAPTMLSPSLPASPGPDQPLNIILPFMELEAMLSLRDRGYSILALAMRAKSPPELLRSQSLAI  
FTLSDSVFLKDGQDFVDNVTYHVVPNRRLLADLMHLPAGTVLHTLLDGQSLVVTNSKPFVSNHVGVKI  
PDAFTNRWIAV  
HEIGRPLVISHPHQHR

>MA\_59950g0010

MESLKMALFNGLALVMMLLISAEAQGEDINIVNLAT  
APASAPFSSPPVSAPAPAPHYVNVSNVLEQAGQF  
KTFLSLIAGTQAETQLQTQANNTQQGLTLFAPLDGAFSSLRPQYKAMLSKLTDDQAPTLNPLSTMGSYKFN  
VSAFGAQVNVSTGLVNAPLTSSIFSQAPVAVYEVNKVLLPEEIFGLPIP  
SPAPSPTPVSAPTPALSPSAGVQSP  
LSSSDHTN  
GAHTWHLNAKDIAIQSGLAMFGFLFLLNQQCV

>MA\_5195g0010

MVLVCIMSFTILVFSSAQA  
INLGAVSLAS  
APATTPAAPAPGPVSLNLSGILDKAGQHAAPPAEQFSAGRHD  
LRPVGRRLRGSEAGDAERHYGPRQDRPAAIPRAAKLXXDKIALQYHALPSYYTFGQFQTVSNPVRTMAS  
GNGGPFGVNVTAVGNSVNISTGLVNTPVNSAVYSQNPVAVYQVDKVLLEEIFGVKP  
PAAAPAPEAGAPIS  
SPAVSPSGGSASAPISSPAVSPSGGSASGSS  
SACGSIEALYKGLYIVFLAAGGLFMIS

>MA\_4482888g0010

VKNELKKLSSSEDKESLLEFHALPIYSPRTTLKFSKRPIATMASTGPGKYDIKVSSAGDTVILNTGVDKATITSL  
LDDVPMVILTVDKVLKP  
KELFAL  
APAPVPAPSP

>MA\_309953g0010

GVANLIRVTMKDCTAVIQIVSCFIFMVGIVAGGVANLIRVTMKDCTAVIQIVSCFIFMVGIVEGSHSHENAG  
MVLLAAKI **TPKLTPTPAPAPTAP** VFTNLKDLLSLA **GPFKTLNLLASDLLTSIQSQANNTAQERSVVGPLHS**  
**QVLPDEKKEVLLAHCPKFYTLTDFQNFSPANTMATGSNGGKYNLNITAMSGAVTVSSGYVSTAITGSVR**  
**VTDPVAVYTMGKVLLP** EDIFGLP **SPSPAPAPEADNSSPNETPATSSPSANTP** SAASFLGAQQSIYLILAIAAG  
ALLLL

>MA\_89859g0010

MVSLLVHVFHREFGFQVPTMERSGNENGRRRAIAAYLVPCYLLICIFLLAMAMED **TPVQHMESE** STDQVFE  
SLLAAGYAEMAILRHADAAGFDLETCRNV **TIFAPPDALLPVVGSPALPHVLCBVAAQRLSYGDLVNKTSSDR**  
**IPSLALGHPIVTTGPLTNQGTGKYVVLNGRARVSPDLYGDANLIVHGIDRVL** DNERDEVISNLVRRKAKKAKK  
QHKKRHKRSARTRPRMACACRRHHNMIPHSPLVSSRPLEDLHMLRGSNRRRGAYSNSNESRIMRRATEVV  
GSPALDYVTVNDTTAA **TPKFGTPNYKISEGLMDMSP** SGLEWLPFEDDIIVKDEDED

>MA\_10360g0010

**MALSSYYLPLLATMALYLSSAVT** QQEA **TPIVMISP** TQTTTTIKNSSEALDHAIDEMKAASYAFVMILELVGDRL  
PMKGLTFLMPSEKLAHAAASKVDLLMHHTIPRPLTFHDLHFPTGSFIPSLPDYMYSVANDGKNNFSLNNVK  
**IVTPDLCSGPAIQCHGISSV** TDNTIY **SPPPSVNLPLAPHYSSNSASP** PLLNDPLNNQH **APNSAMAPASLQQDS**  
**P** FQNFTTVFSRAVQSPPRYYVGHIALILLVLSVGYFLAISDV

### Amborellales

*Amborella trichopoda*

>scaffold00004.170

**MDVQKMHGFLQIAVALSLLCNGPNAAA** LQKPESIAGATASSSGFNSSPINSNSVLVALLDSHYTELAELLE  
KALL **Q** TLEEAVGKHNTIFAPRNEALERDLDPFKRFLLEPGNLKSLQSLIFHVIPRRIPAKNWPESDAHSH  
**DTLSSDRLTCTCKNRVRKVDLASLIHPDSIVRPDGVHIGIERLLIP** RSVQAEFNKRRSLTSIQAVLPEGAPEVD  
PRTARLKK **PAHSAPAPPYTPTLPIYAAMAPGPSLAPAPAGP** GSGHHWFDGESQIKDFIHTLLHYGGYNEL  
ADILVNLTSLATEMGKLVSEGYVITVLAPNDEAMAQLTADQLSEPGAPEQIVYYHVIPEYQTEESMYNAVR  
**RFGKLQYETLRLPHKLVAEEADGSVKFGHGECSAYLIDPDIYMDGRISVQGIDKVLFP** DERPTPKGKKTETL  
SKTAAKAPARRGKLEVACRMLGAFGQDSRFSTCH

>scaffold00006.127

**MRQFPAALLFFCLISATSG** HNITKILAQF **HEFSKFNDYLSRTHLASEINRRTTITVLAVDNAAMDDILAKNY**  
**GIYEIKNILSLHILLDYFGAKKLHQITNGTALAATLYQTTGSAPGTSGFVNITDEKGGKVSIGADDNGGVLD**  
SYVKSVKELPYNISVLQVSKILN **SPSAEAPAPAP** TEQNLTAVMTKKGCKLFADQLTATGAECTFVDAVSGGLT  
**AFCPTDDIWTKFVPKYKNLSADHKVSLLLFHGVPIYQSMQGLKSNNGPMNTLATDGAASYSVTVQNDGE**  
**QVTLKTKAVTAKITGTIIEDPLAVFSIDKVLQPK** ELFAG **APAPAPAPEEADSPSPSSAKVAAGPASDSPDDA**  
**P** ADDSAND **N** GSVTIRGGLLGFVITVLLVVVV

>scaffold00024.68

**MGNRLQHSLICFSIFLICNA** QETLSFSLPLAAQEFKTTTAYPPFPYPETHTSLAPILSNLGYKELAMAVPFFY  
DSYLSSWTGPATVFGTNDTAIRSCSHCSRTQILKERIVPGLFTYHHLSKLAHGTKIQTMRSDRCITVTTMNS  
TENTAKILIDGVQITRPDLFNDDLLVIHGLDDFVFPL **SPLSCFSP** EKPPLTESANDMPENDTSTM **SPTPDNAT**  
**DVGKMTSPSSAPATFPA** ISMRLSLRDAMLRLRASGFIVALVLRKYPELVELGNM **TIFAPDDASIFSGGYAY**  
**VNNVRFHIVPDRYLKGSDLAQLHLGSSLQTLVRGQELVVTNAGSSVGLRINYPVPLKGPDAVYNSRIVVHSI**  
**FVPFPRIGVPDWVVSNAFEDGLFHEVGSVSEAHGLDLGGMNEPRRRSVSEDDVFFPEVESTAWMAPE**  
RQVPEAITDEGL

>scaffold00028.84

**MKKPSLSLLIFLSILTSTS** QPTNTSNLQEAIRDMKARSYYTFVLLQMMVSKHANHRLSHDI **TFLMPSDKD**  
**LANYNFLPGQLKELMLTHSIPNSMLFKHMLHFPTGTLLPSARHSRFLNVSNHGSYSFYLNARIVAPNVCG**

STNIRCHGLSTIIIEYESSSLPVTPVTIPAPQATTPASPVTPARPSPIPASPLTAPPLPASPEGIPAYFIPTPPSPPP  
PPPPVTGGSPPYDGMALPYGEMEEEEATP

>scaffold00002.569

MLFSGSSSFNITSFFWRHPDYTTFNLLTATNVAEEIGGRSSLTILALSNSLMAPFISGYNGNLPTQQVSDI  
LRYHVLLEYLDWDRFSQITSRGTLVTTLYQTTGRAPTSMGAVNITSSNSQIHIGMPLPNAGFNASISGMVD  
KFPYIISIFSIDRILIPYIGIDIYSAPPPSLFINITDVLVRAQNFNFLVSMIEASGVVYEFERGEVAGITIFAPDDD  
AFSLLNPETLQGLTADKKALILKYHVLLSYYPGLSLQTLNPNVQPTLATEEIGAGTYTLNITRLRGNVAVSSGIVI  
APVTQTVFDQKPLAIFTVPKVLLPKEIFGSPPPAPVPAPPPNLGEVPLVSPPHLSKPPSCSPPNTNHHNHHH  
HHHHHPPRPPLPPPFSSSPAPKPSEPALHAPFISPVSSFETAPPSSSSSSWNSSSHGLSPSISPPHMGMLPM  
QPPASSPSPSPETDRNKGSKGVLRETQFGPLLTICFIVLVDQIWGRMV

>scaffold00001.234

MKGKMKLSAMAIALAWLLFMDSTRAATVSSPSPSPAPAPAPDYVNLTELLSVA GPFHLEKLESTKVIDTF  
QNGANNTDQGITIFAPKDKAFSSLKKPSLSNLTSDQLKSLMLYHAPEYYSLADFNLSQQGPTSTFAGGLY  
ALNFTDNKGSVSLDSGWSQTLISSVYSTRPVALYQVDSVLLPEAIFGKAPPPAPAPAPADTFTPADVSPSG  
SQENPFSPKSSPSTSANAAASRPVAMTALFSPVVALVHLLLVAGGVVVL

>scaffold00393.1

MAPSVLVLALTALACLSGAHAQAPPNVTGILSRAQGFTVLIRLLQSTQVANQITNTLNNSNQGLTFAPT  
DNAFNSLPPGTLNLSQQDQVTLILYHVLPPQFYSLQGFQTLNPNVRTQASGMGGGQYTLNVTTVASSMQ  
VNVTTGLVTTPIANSINVTSP LAVYEVDKVLLPLDMFGVKPPTGAPQAAETPTAGAKTPVAAGP TAAGGG  
SNAASSVARGSLLGVMMAVVVVVVVQP

>scaffold00007.129

MDFGHAFALSLIALLSATLAQPASAPAPTGPTNITAVLEKAGQYTMLIRLMKATQVADQMNNQQLNNS  
AQGLTIFAPTDNAFSSLPKGTNLSTLDQKQVSLIQFHIIPSFISVPQFQVTNPLRTOAGSGEDQFPLNVTS  
GNQVNVSTGINDAPVANTVYTDGQLAVYQVDKVLLPIAIFRPAVPAPAPAPGGKAKKKKKEAGAPATDAD  
ATADD SATSGPAVGTA AA AVFAAFMLVVGQGL

>scaffold00069.206

MAIKPPLLLLLLSLIATSASLSSAHNITEMLSAFPDISLYNSYLTQTKLCDEINTRQTLTVFVLNNAAMSALAK  
HPLSVVKNVLSLLVLDYFDNQKLHSITDGSMLSTTLYQTTGDAKNFGFVNITDLKGGKVGFGSAAPGSP  
DSTYTKSVKQVPYNISVMEISAPIIAPGLLSAPAPSVSQVNLTATLEKAGCKIFASLLASSGVLKNYQDAMDK  
GLTILAPNDEAFKKPEVPDTAGMRVAQLVSLLEYHALPSYSPPGALKAAATGPVSTLASGVRKFAFRVATSGD  
EVTLDTGVDKSRIASTVLDDAPLCILTVDNVLLPEELFPHAPASAPSPVPVSAPAPSPVAEAPSPVAEVPA  
AASPPAPTAAGSEASPSEAPAESADSKGASGDKARPLCTAAALVFGSFACFLLLL

>scaffold00012.127

MIAASGVAAEFESDEQGAGITVFAPTDEAFSALPPPEKLQDLSADKKAVVLKYHVLHCYYPGLSLESIVNPV  
QPTLATEQKGAGQFTLNITRANNTVAIDTGLVQASITRTVFDQNPVAVFGISHVLLPREVFSGVYSSTGGSP  
EYAPPPPELPLEAPETEAPTRFSAAPGRDV GASIGRRIGVSLSLSRCSAYLEHRVKSPITIPGVNSLTGI  
DGVK

>scaffold00001.224

MKLSAMAIALAWLLFLDSTKAATVSSPSQSPATAPDYVNLTELLSIAGSFLLFLEKLPKPGQQQLKSLMLYHA  
IPKCHSLAEFKNLSEQGPTSTFAGCQYALNFTEKNGSV

>scaffold00024.69

MGNCLQLALLCFAIFLLCNAQETLSFFLAPSPQTQEFNPPTYLPLSYYPETHTSLAPILSNFGYEELAMAVPFLYDPFS  
SSWAGPATVFAINDTAIRSCSHCSRLQILKERIIPGFFTYHHLKLAHGTKIQTRSSDRCTVTSTNSTQNTAKILIDG  
VQITRPDLFNDGLLVHGLDGFVFLPPQSCFSPA KSPSWTENSTSTMTLTPENATDTRYMTPARGP KTFPAISM

RLSIRDAMLRLRASGFSIVALALRAKYPELVGLRNM TIFALDDASIFSGGHSYVNNVRFHIVPNRYLKGSDLAQM  
NMGSSLRTLIQGQDLVVTNPGLGVDSLRINYVPVKGPDAVLNWRIVVHSI FVPFPRVGVPDWWVSNAFDHG  
LFHEVGSVSDVDVLFPEVERTARIAPEGHVAEREIVDEGL

## Eudicots

*Arabidopsis thaliana*

>AT2G35860

MDSSYGATKFLLLFLTTSIATA LPDNKPVPGQINSNSVLVALLD SHYTELAELVEKALLQTLEEAVGKHNITI  
FAPRNDALERNLDPLFKSFLLEPRNLKSLQSLLMFHILPKRITSPQWPSLSHHHRTLSNDHLHLTVDVNTLK  
VDSAEIIRPDDVIRPDGIIHGIERLLIP RSVQEDFNRRRSLRSISAVIPEGAPEVDPRTHRLKKP SPAVPAGAPP  
VLPIYDAMSPGPSLAPAPAPGPGGP RGHFNNGDAQVKDFIHTLLHYGGYNEMADILVNLTSLATEMGRIVS  
EGYVLTVLAPNDEAMAKLTDDQLSEPGAPEQIMYYHIIPEYQTEESMYNAVRRFGKVKYDSLRFPHKVLAQ  
EADGSVKFGHGDGSAYLFDPIYTDGRISVQGIDGVLPKEE TPATEIKPAAP VVKKVSRRGKLMEVACR  
MMGSRFIPCQ

>AT5G06390

MDRRIYGGSAVIHLFFSVLIFSAASA LSKNQSPSSGSGQINSNSVLVALLD SRYTELAELVEKALLQTLED  
AVGRHNITIFAPRNEALERDLDPFKRFLLEPGNLKSLQTLLMFHIIPNRVGSNQWPSEESGRVKHHTLGN  
DQVRLSNGQGKKMVDLAEIIRPDDLTRPDGLIHGIERLLIP RSVQEDFNRRRSLQSISAVLPEGAPEVDPRTH  
NRLKK PAAPVPAAGSPPALPIQSAMAPGPSLAPAPAPGP GGKQHHFDGEAQVKDFIHTLLHYGGYNEMAD  
ILVNLTSLATEMGRIVSEGYVLTVLAPNDEAMAKLTDDQLSEPGAPEQIVYYHIIPEYQTEESMYNSVRRFGK  
VKFDTLRFPHKVAAKEADGSVKFGDGEKSAYLFDPIYTDGRISVQGIDGVLPF QEEEVVESVKKPVKKIVQ  
PRRGKLLEVACSMGLGAFGKDTYLSKCR

>AT3G52370

MDDLKLLFFLLTISITTA LPDKPGSGQINSNSVLVALLD SHYTELAELVEKALLQTLEEAVGQHNTIFAPR  
NDALEKNLDPEFKSFLLPKPNLKSLLMFHILPKRITSPQFSSAVVSHRTLSNDHLHFTNGKVNSAEITKP  
DDLTRPDGIIHGIERLLIP RSVQEDFNRRRSLRSIAAVLPEGAPEVDPRTHRLKKKP APIPAGAPPVLPVYDA  
MSPGPSLAPAPAPGPGGP RHHFNGEAQVKDFIHTLLHYGGYNEMADILVNLTSLATEMGRIVSEGYVLT  
LAPNDEAMAKLTDDQLSEPGAPEQIMYYHIIPEYQTEESMYNSVRRFGKIRYDSLRFPHKVEAQEADGSVK  
FGHGDGSAYLFDPIYTDGRISVQGIDGVLPF EKTPEKKTGVPVKKAPKPRRGKLMEVACTMLGSQF  
PTCQ

>AT3G11700

MDRCIYGCSVITIFFSFFLLNASA LESGHHNITGSGQINSNSVLVALLD SRYTELAELVEKALLQTLEDVAVG  
RHNITIFAPRNEALERDLDPDFKRFLLPKPNLKSLLMFHILPKRITSPQFSSAVVSHRTLSNDHLHFTNGKVN  
HLSKLKGTNGKRLVNSAVITRPDDLTRPDGLIHGIERLLIP RSVQEDFNRRRSLRSISAVLPEGAPEIDPRTH  
LKKSATAVSV PAGSPPVLPPIESAMAPGPSLAPAPAPGP GGAHKHFNGDAQVKDFIHTLLHYGGYNEMADI  
LVNLTSLATEMGRIVSEGYVLTVLAPNDEAMGKLTDDQLSEPGAPEQIMYYHIIPEYQTEESMYNSVRRFG  
KVKEYTLRFPHKVGAKADGSVKFGSGDRSAYLFDPIYTDGRISVQGIDGVLPF EEKEETVKKPTGPVKK  
VVQPRRGKLLEVACSMGLGAIKDSYLSRC

>AT5G55730

MAKKMSSLIIIFNILLTQTTHA HNVTRLLANHPFSFSFSLTQTHLADEINRRRTITVCAVDNAAMSALT  
SKGYTLSTLKNILSLHVLLDYFGTKLHQIR DGSALAATLFQATGAAPGTSGFVNITDLRGKVGFGPDGGD  
LSSFFVKISIEVPYNISIIQISRVLPSETAA APTPAPA EMNLTGIMSAHGCKVFAETLLNPGASKTYQESLEGG  
M TVFCPGDDAMKGF LPKYKNLTAPKKEAFLD FLAVPTYYSMAMLSNNGPMNTLATDGANKFELTVQN  
DGEKVTLKTRINTVKIVDTLIDEQPLAIYATDKVLLPKELFKASAVEA PAPAPAPEDGDVADSP KAAKGKAKG  
KKKKA APSPDNDPFGDSDSP AEGPDGEADDATADDA GAVRIIGGAKAGLVVSLCLFASSWLL

>AT5G16920

MRAIQTHVITFCMLVIIVTSSTRAQKSPHVPNNHELISIAIEEMEKANYFSFVMLINMLPSVNPRLANVTFL  
MPKDKTLSTSNINQQDSVTEFLLRHSIPSSLLFEHLNLIPNGSIVPSSLPHYTLEISNGGRSNYFLNNVKIISR  
NICSLGSIKCHGIDGILQSPSTVDDDDSPRNNHTLPFISCPSSHNNNSDQNSHNNSDQNSSR PADHTLTAPP  
VSSPISQPKSDSPSIHDVKMLTSIVIPLFGLLASLIGM

>AT1G15190

MAKISSASCFAIFLGALIILCLPHPSTGVPLEELERAIAILRVGRALFANAITSDLLFDLLSDESLTLFAPTDS  
MLFDLDMTHSLPFYVSTLRHLSVPLRLSLSGRLSPNSSLPTLLPSHRLLLTKHSSNDSIFLDGVQLLIPGLF  
DGQHIAVHGLADLLLTAPSSPNRLVEDSTALAKSPWFLGSRFSPAPEPYFAFMDLSPAESPVEEVSPSPS  
WGEGEEDFIVGDEGGPLDGRNNGF

>AT3G46550

MANVISISHFTLLALPYLLLLSSTAAAINVTAVLSSFPNLSSFSNLLVSSGIAAELSGRNSLTLLAVPNSQFSSA  
SLDLTRRLPPSALADLLRFHVLLQLFSDSDLRRIPPSGSAVTTLYEASGRTEFFGSGSVNVTRDPASGSVTIGSP  
ATKNVTVLKLETKPPNITVLTVDLIVPTGIDITASELTTPPPTSTLSPPPAGINLTQILINGHNFNVALSLLVA  
SGVITEFENDERGAGITVFVPTDSAFSDLPSNVNLQSLPAEQKAFVLKFHVLHSYTLGSLESITNPVQPTLA  
TEEMGAGSYTLNISRVNGSIVTINSGVVLA VTTQAFDQNPVSVFVGVSKVLLPKELFPKSGQP VATA PPQEI  
SLSPESSEQPSRLVSPPREIVSSGAVKRPLGFLVLWCWCIAFCYVLV

>AT3G60900

MATSRAFTLFAFTLSLLTVASTVSGHNITQILSDTPEYSSFNLYLSQTKLADEINSRTTITVLVLNNGAMSSLA  
GKHPLSVVKNALSLVLLDYYDPLKLHQLSKGTTLTTLYQTTGHALGNLGFVNVTDLKGGKVGFGSAAPGS  
KLDSSYTKSVKQIPYNISVLEINAPIIAPGILTAPAPSSAGVSNITG LLEKAGCKTFANLLVSSGVIKTFESTVEKG  
LTVFAPSDEAFKARGVPDLTNTLQAEVVSLLYHALAEYKPKGSLKTNKDAISTLATNGAGKYDLTTSTSGDE  
VILHTGVGPSRLADTVVDETPVVIFTVDNVLLPAELFGKSSSPAPAPEPVSAPTPTPAKSPSPVEAPSPTAASP  
PAPPVDESSPEGAPSDSP TSSSENSNAKAAAFHVNAPALFTALVTIAATSLLL

>AT2G45470

MAASQTFSLLAFTFSLFAFASTVSSHNTQILADSPDYSSFNSYLSQTKLADEINSRTTITVLVLNNGAMSALA  
GKHPLSVIKSALSLLVLLDYYDPQKLHKISKGTTLTSTLYQTTGNAPGNLGFVNITDLKGGKVGFGSAASGSK  
LDSSYTKSVKQIPYNISILEIDAPIIAPGVLTAPAPSASLSNITG LLEKAGCKTFANLLVSSGVLTYESAVEKGLT  
VFAPSDEAFKAEGVPDLTKLTQAEVVSLLYHALAEYKPKGSLKTNKNNISTLATNGAGKFDLTSTSGDEVI  
LHTGVAPSRLADTVLDATPVVIFTVDNVLLPAELFGKSSSPSPAPAPEPVTAPTPSPADAPSPTAASPPAPPT  
DESPESAPSDSP TGSANSKANAAVGVSTPSLFTALVTIAAIAVSVSLCS

>AT5G03170

MATSRTFIFSNLFIFFLVIATTYQAPAPGPSGPTNITAILEKAGQFTLFIRLLKSTQASDQINTQLNSSSSNGL  
TVFAPTDNAFNSLKSGTLNSLSDDQQKVQLVQFHVLP TLITMPQFQTVSNPLRTQAGDQNGKFPLNITSS  
GNQVNITTGVVSATVANSVYSDKQLAVYQVDQVLLPLAMFGSSVAPAPAPEKGGSVSKGSASGGDDGGD  
STDSDAERTGFGFGIRITTVA AIAASSSLWI

>AT5G60490

MEHSLIILLFTVLLLLTTTPGILSQPSPAVAPAPPGBTNVTKILEKAGQFTVFIRLLKSTGVANQLYGQLNNSD  
NGITIFAPSDSSFTGLKAGTLNSLTDEQQVELIQFHVIPSYSVSSNFQTISNPLRTQAGDSADGHFPLNVTTS  
GNTVNITSGVTNTTVSGNVYSDGQLAVYQVDKVLPPQQVFDPRPPAPAPAPSVSKSKKKKDDSDSSSSDDS  
PADASFALRNVGSVCDASVFCVMSVMLAWFYL

>AT2G04780

MAKMQLSIFIADVVALIVCSASAKTASPPAPVLPPTPAPAPAPENVNLTELLSVAGPFHTFLDYLLSTGVIETFQ  
NQANNTTEGITIFVPKDDAFKAQKNPPLSNLTKDQLKQLVLFHALPHYSSLSEFKNLSQSGPVSTFAGGQYS

LKFTDVSGTVRIDSLWTRTKVSSSVFSTDPVAVYQVNRVLLP E AIFGTD VPPMPAPAPAPIVSAPSDSPSVA  
DSEGASSP KSSHK NSGQKLLAPISMVISGLVALFL

>AT1G03870

MATTRLTLAPLLLIAAVLLATKATA Q PAAPAPEPAGP INLTAILEKGGQFTTFIHLLNITQVGSQVNIQVNSSSE  
GMTVFAPTDNAFQNLKPGTLNQLSPDDQVKLILYHVSPKYYSMDLLSVSNPVRTQASGRDNGVYGLNF  
TGQTNQINVSTGYVETRISNSLRQQRPLAVYVVDMLLP GEMFGEHKL SPIAPAP KSKSGGVTDSDGSTK  
KAASPSDKS GSGEKKVGLGFGGLIVLCLKFLF

>AT2G20520

MSSSLFSYVLLIFLFTIPYIQS QPT APAPTTEKSP INLTAILEAG HQFTTLIQLLNTTQVGFQVSVQLNSSDQG  
MTIFAPTDNAFNKLPGTLSLTYQQQIQMLYHIIPKYYSLLSDLLASNPVRTQATGQDGGVFGNFTGQ  
AQSNQVNVSTGVVETRINNLRQQFPLAVYVVDVLLP EELFGTKT TPTGAPAPKSSTSSDADSP AADDE  
HKSAGSSVKRTSLGIVVSFALFCCSVIYIA

>AT5G44130

MATTPLLLLLTAVFLSTEITA QRA APAPGPAGP INITAILEKGGQFVTLIRLLNTTQIGNQINIQINSSEGMT  
VLAPTDNAFQNLKPGTLNKLSPDDQVKLILYHVSPKFYTLEDLLSVSNPVRTQASGRDVGGVYGLNFTGQG  
NQVNVSTGVVETRLSTSLRQERPLAVYVVDMLLP EEMFGERKI SPMAPPPKSKSP DVSDDESSSKAAA  
PSESEKS GSGEMNTGLGLGLVLVCLKFLL

>AT3G12660

MSSSLTIFFFFFASTFLYTSS NSFNITNILNEH DDFSNNFQLLSETQLASTINKRQTITVLVVSNGALSSLSGQP  
TSVIKKILSLHIVLDYYDQKKLKNLSKKTVLLTTL FQSSGLARGQQGFLNATVMKNGDVAFGSAPVPGSSDA  
QLQDTVAALPFNISVLHISSAIMIDVKGDN APTASPLSPVSSPPRPAESP NDDGQDFDEPPSSAPGAADE  
PSENAGS ANGVSRRNDSQPAFAFTLLMSFIWWFMARLR

>AT2G24450

MGLKVSSLLCLTILLAVSSIVSA VNITRVLEKY PEFSTMTTELLAKTELTPIINKRQTITVLALNNDAGISISGRPE  
EEVKNILMNHVVLDYFDELKLKALKEKSTLLTTLTYQSTGLGQQQNGFLNCTKSNGKIYFGSGVKGAPQTAEY  
ITTVFRNPYNLSVVQISMPIV APGLGSPVKVPPPPPMSSPPAPSPKKGAATPAPAPADEGDYADAPPGLAP  
ETAPASAPSESDSPAPAP DKSGKKKMAAADEAEP S ASNTGLSFGAVLVLGFBVAFVGF

>AT4G31370

MGLKASLSLLSLTILLVFSKVTA NNITLAFQKYSKFSTMRDLFIKTKLIAAIDKYQTITVLAVSNDIAISSITNRS  
EVELRNILMTHVILDYDELKLQGMREKSIMLTLYQTTGLGEQMNGFLNVSKSKGRVYFG SEVKNSPLNA  
EYVSTVYHNPNYLSIIQITMPIVAPGLSLAIFPPPPYVHV APYPTPMDASVV PAPGPAADDN SPDSAVPKT  
PPAPATDTPEADSPAPAP SADNEKIEAADKAKPSS ASKAGWSFDVILLAFASFAGF

>AT4G12730

MAYLRRRAATALVLIFQLHLFLSLSNA HNITRILAKDPDFSTFNHYLSATHLADEINRRQTITVLAVDNSAMSSI  
LSNGYSLYQIRNLSLHVLVDYFGTKKLHQITDGSTSTASMFQSTGSATGTSGYINITDIKGGKVAFGVQDDD  
SKLTAHYVKSVFEKYPYNISVLHISQVLT SPEAEAPTASP SDLILTTILEKQGCKAFSDILKSTGADKTFQDQTVDG  
GLTVFCPSDSAVGKFMFKFSLSPANKTALVLYHGMPVYQSLQMLRSGNGAVNTLATEGNNKFDFTVQN  
DGEDVTLETDVVTA KVMGTLDQEP LVIYKIDKVLLPREIYKAVKTSAPAPKSSKKPKNAEADADGPSAD  
APSDDDVEVADDKNGAVSAMI TRTSNVVTAIVGLCFGVWLM

>AT5G40940 (FLA20)

MNKKPSKYFPSLNRTDYKNCNFCNGFSLKPNEKKSSKNASMASKLLTFFLIFFVLDIDLATSMTSVSSAVEVL  
SDSGYLSMGLTLKLANQDLNLEDWQEL TLFAPSDQSFSKFGQPSLLDMKYQLSPTRLPGETLRNLPNGAKIPTLR  
SNYSLTVTNSSRFGGKTSINN VVVQDSPVFDG YVVIYGSDE FFTSPTKISDDSSSSSSIPSTTSSTGSIPISSATQT  
PPSP NIASDSTRNLPNRSKPVNRFNIFESASRLLMSRGFVIIATFLALQLEDNTSGNDTKI TVFAPIDEAIPNPTTKF

SDYVTIFRGHVVSQLLLWKDLQKFAKEGSILQTVLKGYEIEISLSGDILLNGVPLIYPDLVNDWIAVHGFNQMI  
TKEKQVDVGDSITVLNNGEQEEGVHGEYSSELGDYGLH\*

>AT5G06920

MGCCSSDCFVYFILSIALAFMAISTTLRSPDPSEPTIPIAFSSSSPSLSLNASNTLRQSNFKAIATLLHI  
SPEIFLSSSPN  
TTLFAIEDASFFNTSSLHPLFLKQLLHYHTLPLMLSMDDLKKPQGTCLPTLLHHKSVQISTVNQESRTAEVNHVR  
ITHPDMFLGDSLVIHGVI GPFSP LQPHSDHLIHTPLCQSDTTNKTSNNEEVPVSI DWTRIVQLLSSNGFVPFAIGL  
HSLNRIVNDHNHHKNLTGVTLA TPNLVSLSASPFLYEVVRHHILVQRLTYKDFASMSDKATVKTLDPYQDLTIT  
RRNVNSSGGDFMISGVEIVDPDMFSSSNFVIHGISHTEIPHV\*

*Eucalyptus grandis*

>Eucgr.B03801

MDVPIYGV PALPAFFLASLLFLAGTCPALPDHPRPHARPSSPAGGVGGGGVSGPGQINSNSILVALLD  
SH  
YTELAELVEKALLQTL EETVGRHNITIFAPKNEALERDL DPEFKSFLLEPRNLKSLQTL LMFHIVPSRID  
SAD  
WPEPAPSAAGHREELS SSHRLRLAKRESGEREVD RARVIHADAVARPDGVIHGIERLLIPQSVQDDFNRR  
RSLRSITAVKPEGAVEVDP RTHRLKKP APPAKAGSAPALPIYDAMAPGPS LAPAPAGPGGPPHHHFDGEA  
QVKDFIHTLLHYGGYNEMADILVNLTSLASEMGR LVSEGYVL TVLAPNDEAMAKLT TDQLSEPGAPEQIM  
YYHLIPEYQTEESMYNA VRRFGVKYDTRLRLPHKMVAQEADGSVKFGQGEGSAYL FDPDIYTDGRISVQGI  
DGVLFPP EETEVEKKTPTKVAAPRRGKLELTCQMLTAFGQH SRFNSCR

>Eucgr.A02551

MDRRFCGLAAALLLVLLPIAAAALPHRAASNATGAQINSNSVLVALLD SHYTELAELVEKALLQSLEDAV  
GRHNLTIFAPRNEALERDL DPEFRRFLEPRNL RSLQTL LSHIVPARLGSPQWPLPDSRPARHPTLGSDPVH  
LSVAPGSGLPAVDSAEVVRPDDVVRPDGVIHGIQRLLIPRAVQEDFNRRRSLRSIAAVIPEGAVEVDP RTHR  
LKKP APPAPAGSAPALPIYDAMAPGPS LAPAPAGPDGPRGHFHGEALVKDFIHTLLHYGGYNEMADILVN  
LTSLAVEMGR LVSEGYVL TVLAPNDEAMAKLT TDQLSEPGAPEQIVYYHIIPEYQTEESMYNA VRRFGKVRY  
DTLRLPHKMVAQEADGSVKFGQGDGSAYL FDPDIYTDGRISVQGIDGVLFPAEETAPASTTAAEKKVVKV  
AKPREVFD GSSVQYARSWATFSFVLVSIKQ

>Eucgr.F02049

MQVRRTPPHLLAALLLVAAATSLARAHNITSLLAGHPDFSTFNHYLSATHLAAEINSRTTITVLAVSNAA  
MNDLLAEHPTTTTLKNILSLHVLLDYFGSKKLHQLTDGSALAATLFQSTGSAPGSGFVNITDLKGGKVGFA  
PEEGSSDAGAYFVKSLEELAYNISVIEISKVLPSAIAAAPAPEPSQVNVTDVMAAHGCKEFADALLNSSDAL  
KTYEDNVVGGLTAFCLDDPFKAFRPKFDNL SAADRASFLEFFATPVYMSMSMLRSNNGLMNTLATDGS  
RKFDFTVQNDGQDVT LKTKVNTAKITGTL LDEQPLVIYTLDKVLLPQELFKA AV SPAPAPAPTPEKAAESPK  
AAAKHKSPAPPTSAASDAPADSPDGTVADQKSANARICCGRFGFMALSLLVLAL

>Eucgr.F03689

MLQRRRHLLPLALSFLAAALTVARAHNITRLLAKHPEFSTFNHYLTETHLAAEINSRTTITVMALDNAAMS  
RLLAPHPTIATLKNVLSLHVLLDYFGPKKLHQITNGTALAATLFQATGSAPGSTGFVNITDLKGGKVGFAPE  
NNGRLDTYFVKGLEEIPYNISIIQISNALPSDVAA APTPGPSEMNLTRLMSAHGCKVFADTL DANADAMKT  
YEDNVEGGLTTFCLDDPFKQFLPKYNLSAPGKASFLEFFAIPMYLSMAMLKSNNGPMNTLATDGASKY  
DFTVQNDGEEVTLKTRVNKVKITGTL LDEQPLAISIDKVLMPKELFKTAAL TPAPAPAPEKAADSPKSSKAK  
SPPATADSPADSPESDPA DQTADS GSVRFKSARSGLVLSLWFGVHFL

>Eucgr.G02210

MATPVSAIALLLLSLLPLCSPLPLESLKEATHVLSNSGFVSMSTLNLISKTLMSQPVS LTVFSPADDSFARFG  
QPPLSLLQFHFSPHALSLDTRLRLPRGAKISTMNNANHSLMVTTSPSDYQVEINGVKIVGSPVFNDGNLVVF  
GIEMFFDPEFQTSAPVQSPVLGLECVAPRYGGLEDLSSGNVFGACGAMRSKGYFAMASFLGLQLMKLKG  
DNQMLTVFTPSDEAMVNHTGSFSDYPSIFLRHVIPCKLSSDDLLEFNNGILVHTHLEGFVIEVTRSGDRLML

NGVPMTSPDIYTSDWLSIHGVLVDVIA

>Eucgr.G02206

MATPVSTVALVLLSLLPPRSP LPLESLREATHVLSNSGFVMSLTLNLIPKTLMSQPQVPSLTVFSPSDDSFQAF  
GQPPLSLLQFHFSPHALS LDTLRSLPHGAKISTMNANHSLMVTTSPSDYQVQINSVKIIGSPVFNDGNLVIF  
GIEMFFDPEFQTS APVQSPIPGLECVAP RYGGSEDLSGGNVFGEACGAMRS KGYSVMASFLGLQLMKPK  
GDNQMLTVFAPFSEYPSVFLRHVVPCCKLSASDLLFNNGTLLHHTHLEGFVIEVTRIGDGLLLNGVPMTSPDI  
YTSDWLSVHGILDVIAARESRLD

>Eucgr.G02208

MATPVSAVALVLLSLLPLCPP LPLESLREATHVLSNSGFVMSLTLNLISKTLMSQPQVPSLTVFSPSDDSFARF  
GQRPLSLLQFHFSPHALS LDTLRSLPHGAKISTMNANHSLMVTTSPSDYQVQINGVKIVGSPVFNDGNLV  
VFGIEMFFDPEFQTL APVQSPIPGLECVAP RYGGSEDLSGGNVFGEACGAMRS KGYSVMASFLGLQLMK  
PKGDNQMLTVFTPSEPETLGFVGARQLFVKMSQLDL

>Eucgr.K00086

MATFRALFILLVALNSHSPATA QSNSPRNPHLLTAIEEMKQADYFSFVMLINMSPPVLFEGNL TFFMPDDG  
MLSRIVLPTNDVSHFVLRHSIPKPLFDYLEHIPTGSLIPTSAAGYLVRIDNKGCRSYFLDDVRITKPNVCVAG  
SSIRCHGIDGVLLPVTNVTE SPSPPCPGNTAPVTAMPTPPPPPPASDVIQSLSSASAPATAASPFSP REKS  
ASSRRLGAKGLVNSLLSGIIISAMMESRRNVL

>Eucgr.B02370

MAERISIPKITPATLLYVLLTLPAAPTAS LNV TALLSTFPELSAFTALLSSTIASDLAQRS AVTVLAVPNAYLASS  
DLTRHLSQTS LADVLRYHVLLQFLSADDLHQIPSSGALFTTLFQTTGRATSNFGSVNITRDPSTGAVSVR SPA  
PYSP SNASLLEPIKAVPYNLSIFTVNSLLLPGYFDLMASETRPSLDLNITKALIDG HNFNVAASMLAASGVVE  
EFQADEGGAGITLFVPTDSAFTELPSSQSLQSLPADKKAVVLKFHVLHSYYPLGSLESIVNPLQPTLATE DM  
GAGSYTLNISRVNGSVAIDTGIVQATVTQTTFDENPVAIFGVSRVLLPREIFGKNPSAGSKSGGAIMTA APP  
PDITPSPENSPGGFDGP PPVSREEIRS GSSVAGVQRLMLVLCCIVVYLAV

>Eucgr.H00875

MRPAPPLPTAAALALALLCLSLSPAADA HNITRILAKH PEFSTFNHYLTITHLAAEINRRLTITVLAVDNAA  
MNAILDKHL SVGTLKNVLSLHVLDYFGTKKLHQISNGTTLTSTM FQATGAAAGTAGYVNITDLKGGKGVF  
GAEDNGSDLN AVFKSVDEIPYNISVLHISQVLT SPEAEAPTSP SNLNITAILSKQ GCKSFADLISAGALKTF  
DDNLEGGTIFCASDA AVSAFMPKYKNLTNAQKVSFVLYHGVVYQSLQMLKSNNGMNTLATDGASKY  
DFTIQNDGEDVKLTKKVVTATITGTVIDQDPLIVYKIDKVLQPRELFKAAAGD APAPPAADSP EGDSADQTA  
DSNGV GGGVLSGPRVVGVVLSLCLSVVFL

>Eucgr.K00711

MKSTTVFLITTAILLSSPEAKA QTTK SPPPSLAPAPAPT DHVNLTHLLTVA GSFTFLGYLESTKVIDTFQEQ  
ANSSKDGITIFAPT DKAFFSLKQPSLSNLTQDQLKSLCLFHALSRYSLADFKNLSQSSPVSTYAGGQYTLNFT  
DLSGDVHVNSGWTNTKISSVLSTDPVAVYQVDHVLLPEAIFGTDIPPMP APAPSPVADTPPAADTPSGV  
NVTTSPPSSSEQNQNSSP QLISLGIWSQLFVAVSSMMIMMSG

>Eucgr.A01074

MGEILIFYSCGHPIDSTLPSNLTHSSAPIGSQMCVLHITTQCARVLIAGPSLLTPSQSFFFCLFKNSISSLPLAL  
YILSSANTR SIPFFIASLSSSLSGTFGLGIGGS IPTYENIMELPFACIISLALLSI SPSSHAQIANAPTLSPTPAPAP  
APDFVNLTDLLSVA GPFQTFLSYLESTKVIDTFQNQANNT EEGITLFVPKDGAFA SQKKPSLSNLTNDQLKSL  
CLFHALPHYTLADFKNLSNVSPVSTFAGGEYSVNFTDVTGTVRLSSGWTNTKVSSSVHSTDPVAVYQIDK  
VLLPEAIFGTDIPP TPAPAPADISPAADSP TGGSEAGSSTASKPSSSPKLSNSWGHVLAVSSGLLVLL

>Eucgr.C02101

MNSKAFACLF FAVFIFSSAASA FNITKLLSRY PDFSTFNDFLTQTKLYEQINRRQTITVLALDNSAVGDISGKP

ADVLKSILSAHVVDYYDIEKLTDLSSKSTLTTLTYQSSGTAQNQQGFLNVTQSGEIVFGSAVKGASHNAKL  
VKAVAAQPYNISVLQVS<sup>SP</sup>I<sup>IAP</sup>GIDASNPNGTVHNAT<sup>TP</sup>S<sup>ASPAATPKKAPASSPAKSPVADTPDSSEAPA</sup>  
<sup>ADSPADAPEADAPEASAPEADAPTSSPPAPSDADADAPAP</sup>GKS<sup>SS</sup>SRVTLPVGAGIVMGLLSAMVA

>Eucgr.A01871

MASSSSSSPALSILIIACIFSLTSPQALAQ<sup>SPSAPAPSPSGPA</sup>NLTGILDKN<sup>GQYTSFIRLLTTTQVANQIEN</sup>  
QLNTSTEGTLVFAPTDNAFNNLKAGTINDLSNEQQVQLVLNHVAPKYYSLLSFQSVSNPVRTQGNFAGLN  
FSSQGNQVNVSTGMVETPINNALYQQSPLAVYQVDKVL<sup>LP</sup>PELFEA<sup>PAPASSTPAAP</sup>KSSSSSNSTTSKAP  
SAENS<sup>NS</sup>SGASGKSNMWLGFFVVGVMCMGFLS

>Eucgr.B02486

MSTTLFPRFQINCHSLPPLSSHQKPPSSSTSSSLHNPPLTKSKAKNMMKRLSFLLLVLLFQCSTTLAQ<sup>P</sup>  
<sup>AAAPAPPVIAAPATPALGPAPPVLGPAPAGP</sup>TDITKVLKKA<sup>SQFTVLLKLMRATSVDKQINAQLNNSNN</sup>  
GLTIFAPNDNAFSSLSGTLNQLSSEQQVELVQFHVPTYLAVPQFQTVSNPLRTQAGGSGKFEFPLTLTTS  
GSSVNISTGVTNATVDQTVYNDGQLAVYMVDKVL<sup>LP</sup>MSIF<sup>GPKPPAPAPAPAKPKKKPALASSPVADSV</sup>  
VDTSGEGKLMVPGMMVFGLSVVGTFFYS

>Eucgr.A01158

<sup>MKHQLVLPFSCIAIIFLLHIAPITG</sup><sup>Q</sup><sup>GPA</sup><sup>GAPAAPASP</sup>TNLSSQLSNQKSNQGFTIFAPTDNAFASLKSGLN  
MLSDQEKTLVQFHIIPSVISLTQFSTISNPLRTQAGNTDNGQFPLNVTSGNQVNVTTGVVAASVDNAIT  
SNSKLAIYQVDQVL<sup>LP</sup>LAMFG<sup>TPAPAPAPGAPKKEVPVPSRAPSGSDSAP</sup>VDSS<sup>D</sup>AVANTFNSRTLAPYVV  
AATLGGVLLF

>Eucgr.J00938

<sup>MKHQFIVLALLFLINTAP</sup><sup>TS</sup><sup>Q</sup><sup>PAASPTAPMVLPPPPVSLAPVSPAPDSPPPPAP</sup>PQAHLLKILQKAGGFTV  
LIKLLRGTHVSDQVDSLSLNDGITFFAPDDAAFSALKAGTLNTLSNEQQVQLLQFHMVPTYLTMSTQFQT  
VSNPLMTRAGGVGGKEFPLNVTTKGDKVSVFTGVDGASGEDSAQGPAPPTKKPAELSVSGSSEVGKVK  
GDVVRLLVVGVGAGVVASLGL

>Eucgr.A01741

MAISSSLHSTNESLA<sup>APSSSPGLHQVP</sup>LNASRALGRAGFTAMAALLPI<sup>APELFFSSP</sup>RATIFVIKDLFMANLSSSP  
WLMEEVRLRYHTSPLKLSVDDLKMPRGSCPLTLAKKNVTVTRSDAEQRLVEINGAVITHPNVFLGERLAIHGV  
<sup>QPLL</sup>HKEQELCLVQSSKRNRDPRSLSVVEKERHLVDWGRVIRLSSSGFVSFAIGLQSVLDGILDDNADLASVT  
APADFGFVASNSAILERMVRLHILPHKYPHEELARLPDRASRLTLPGRDLEIGRKDASCSTDTNQRTVAINGLE  
IGVPDIYKSRNF

>Eucgr.H00590.1

MDDELFAASPQSQARRPELIRDDSLSPSLLPILSHLGFHDLAMAVPSLTSPSFTTWNGPS<sup>TLFAPSDSSLKSCA</sup>  
<sup>SCSVPRILSEHIVPGLFSFGYIQLAFGKTVETMSPGHCLTVTSATHRVNTTTRIFIDGVEISRPFDMFNNGIVVVH</sup>  
<sup>GLEGFIAPLSPFSCSIEKMTSLAFPFSLPPPVS</sup><sup>SSP</sup>LMRLMLRDAVLRLRTSGFGILALAIKYPVNLQV  
IFTVDDFSIFTGGISY<sup>VNNVRFHIVPNRYLAMADLERLPAGTVMP</sup><sup>SLEAGQYLAVTTAGGPATMRINYVRMKSP</sup>  
<sup>DVMRNQKV</sup><sup>VHSLFLP</sup><sup>PHLPASLDGLINGQDHVEENVAANQGMKDSCAALEENG</sup><sup>DCEVIPP\*</sup>

*Populus trichocarpa*

>Potri.010G244900

<sup>MAIALSSFNIFFTLLVSTFHLGFS</sup>FSALQENHSNGTYSQGINSNSVLVALLD<sup>SHYTELAELVEKALLQTLED</sup>  
AVGKHNITIFAPKNEALERDLDPFVKRFLLEPGNLKSLQTL<sup>LLYHIVPNRINPSHNSSLQHSTLCRDRVKLSS</sup>  
QESGEKLIDSAKIIQVNAVERPDGVIHGIERLLIPRSVQQDFNNRRSLQISAVKPEGAPEVDPRTHRLKK<sup>PA</sup>  
<sup>PPAKPGSAPVLP</sup><sup>IIDAMAPG</sup><sup>PSLAPAPAPGPGGP</sup>HHHFNGEKQVKDFIETLLYGGYNEMADILVNLTSLA  
TEMGRLVSEGYVL<sup>TVLAPNDEAMAKLT</sup><sup>TDQLSEGAPEQIIYYHVIPEYQTEESMYNAVRRFGKISYD</sup><sup>TLRL</sup>  
<sup>PHKVLAEADGSVKFGHTENSAYL</sup><sup>FDPIYTDGRISVQ</sup><sup>GIDGVLFPL</sup>EEKEKSETKKEIKSVKVAVKPQRRGR

LLEVACRMLGTFGQDSHFTTCQ

>Potri.008G012400

MAMAPSPPCIHIFASILLNSNHLGFSSSSSTLQENHSNGSYSGQINSNSVLVALLD SHYTELAELVEKALL  
QTLEDAVGKHNITIFAPRNEALERDLDPFKRFLLEPGNLKSLQTLLYHIVPNRINLSHNSLHHHSTLCRDR  
IKLGSQSGEKLIDSAKIIQVNAVERPDGVIHGIERLLIPRSVQQDFNNRRSLQSISAVKPEGAPEVDPRQTQL  
KKP APPAKPGSAPVLPIDAMAPGPSLAPAPAPGPGGP HHHFNGERQVKDFIETLLYGGYNEMADILVNL  
TSLATEMGRVSEGYVLTVLAPNDEAMAKLTDDQLSEPGAPEQIIYYHVIPEYQTEESMYNAVRRFGKISYD  
TLRLPHKVLAQEADGSVKFGHAENSAYLFDPIYTDGRISVQGIDGVLFPL EEKESDGTKTEMKSVKVAAPK  
QRRGKLLEVACRMLGTFGQDSHFTTCQ

>Potri.006G200300

MDSHIYGVSKKTLTLLCLSVSSISALPHQNKGTGNSTGTGQMINSNSVLVALLD SHYTELAELVEKALLQ  
TLEEAVGKHNITIFAPRNEALERQLDPFKRFLLEPGNLKSLQTLVLFHIIPQRVGSNDWPGHKSNSRHTTL  
CNDHLHLITKNSGKKVVGSAADVTRPDDVTRPDGVIHGIERLLVPQSVQEDFNRRRNLRISAVLPEGAPEV  
DPRTHRLKKPEPPVRAG SPPVLPIDAMAPGPSLAPAPAPGPGGP HHHFDGESQVKDFIQTLLYGGYNE  
MADILVNLTSLATEMGRVSEGYVLTVLAPNDEAMAKLTDDQLSEPGAPEQIIYYHIIPEYQTEESMYNAVR  
RFGKIGYDTRLRLPHKVAAQEADGSVKFGSGDGSAYLFDPIYTDGRISVQGIDGVLFPE VEKESTSVKKSVS  
SVKVATTKPRRGKLMEVACIMLTGLGQDSRFTTCQ

>Potri.016G066500

MDSHIYGVSEKTLFLTLCLFVASISALPHQNRTGNSTVTGQMINSNSVLVALLD SHYTELAELVEKALLQ  
TLEEAVGKHNITIFAPKNEALERQLDPFKRFLLEPGNLKSLQTLVLFHIIPQRVGSNDWPGHKSNSRHTTL  
CNDHLHLITKNSGKKLVGAALTRPDDVTRPDGVIHGIERLLVPQSVQEDFNRRRNLRISAVLPEGAPEVD  
PRTHRLKKPEPPVRAG SPPVLPVYDAMSPGPSLAPAPAPGPGGP HHHFDGESQVKDFIQTLVHYGGYNE  
MADILVNLTSLATEMGRVSEGYVLTVLAPNDEAMAKLTDDQLSEPGAPEQIIYYHIIPEYQTEESMYNAVR  
RFGKIGYDTRLRLPHKVAAQEADGSVKFGSGDGSAYLFDPIYTDGRISVQGIDGVLFPE VEKESTSVKKSVS  
SVKVATTTPRRGKLMEVACRMLGSLGQESHFTTCQ

>Potri.011G093500

MQRLTILLSLLFLLSTSTTFTRGHNITHILGKHPSFSTFNHYLTTLHLAGEINSRNTITVCAVDNAAMSELLSKH  
PSIATIKNILSLHVLLDYFGTKKLHQIREGTALAATMFQATGSAPGSTGFVNITDVKGKVAFGPEDNEGNL  
DVFYVKSLEEIPYNISVIQISKVLPDVAA APTPEPSAMNITDMSAHGCKVFADTLIANPEASKTYQDSVDG  
GLTVFCPLDDPFKAFFPKFNLTASGKVSFLEFFGVPIYQSLAMLSNNGIMNTLATDGEKKFDFTVQNDG  
EDVTLKTRISITAKIVGTLIDEQPLAIYTIKVLKPKELFKA APTPAPAPAPEKEVADAP KSSKHKKPSSDV VPSD  
SPADSPDGDLDADQTADD NASVTLYGGRLVAMLLSLCSGLLLL

>Potri.001G367900

MLQTVLLSLLFLLSTATTITYGHNITSILGQHPSLSTFNHYLTTLHLAGEINRRTTITVCAVDNAAMSEILSKKP  
SISTIKNILSLHVLLDYFGTKKLHQIRDGTALAATMFQATGSAPGSTGFVNITDVKGKVAFGPKDNGGNLD  
VFYVKSVEEIPYNISVIQISKLLPSDVAA APTPEPSAMNITDMSAHGCKVFADTLIANPDASKTYQDTIDGG  
LTVFCPLDDPFKAFLPKFNLTASGKESLLQFFGVPIYQSLAMLSNNGIMNTLATNGDKKFDFTVQNDGE  
DVTLKTRGTTAKIVGTLIDEQPLAISIDKVLKPKELFKAAL TPAPAPAPEEAADAP KSSKHKKPSADD APSDS  
PADSPDGDAADQTADN NASVRLDGGRLVAMVLSLCLGLLML

>Potri.017G111600

MSTMLLFLLILLISSVLAASNPFNAMEILSTSGYLSMALTLEITSKRHLLESSAATIFAPLDIAFARLGQLSV  
LDLQYHISPVRLSGYYLDSLPGTRIPTLLPNHSLIVTTSLSYFDGKLSINGISIEESALVDFGSLIIFGMSEFFNS  
SLEI SPNLTAPAPAPSPSP VTSLGNTSQNESTGLDVDFGQASHLLMPRGYSIMGTFLDAQLFGIKNQTRLTIF  
APVDQAMDAYAKNVSDYSSIFRKHVVPGLFPRQDLEGFNDGTSLPTFSGGFMINLTKSGDVLVLNGVPVIF

PDMYQSDWLIHGLNQLLTPPLKEEELVGESFSELDGAEDKPDVLDFFDDYVYGAP

>Potri.019G049600

MEAF<sup>TLLVLLMIKVLVCA</sup>TSP<sup>TDIPSR</sup>SQDLVVASDEM<sup>ARANYFS</sup>VMLINMAP<sup>LDQKFQGNV</sup><sup>TFLMPK</sup>  
DRLLSKIRMHQNAVSD<sup>FLLHHSIP</sup>SP<sup>LLFDHLRH</sup>IPPGSLIPSSDPDYMLNISNEGRKSFFLNNVKISSPD<sup>LCT</sup>  
AGSSIRCHGIDGV<sup>LLVDTDRHPL</sup><sup>PACSNSTSPAIVATPPSP</sup>SLPLDIPSP<sup>FSSAPPPGAAAP</sup>TDQEHI<sup>PKHSG</sup>  
SSQLESLSLG<sup>LLKFMATSILV</sup>L<sup>NARVLYTVGQN</sup>

>Potri.T118500

QIYNIIDAILGTGDFKNWANALGMADSTTFPISAT<sup>TFIPSDNSLSPTTTSADPDIFPYHIVPQRLSFADLQQF</sup>  
K<sup>TFSRLPTLLFDKSILITNNSASNFTLDGSR</sup>LTH<sup>PDITYNAAITVHCIDNLL</sup>DHSVYG<sup>TESGKNSSKPD</sup>AV<sup>GPP</sup>  
<sup>PTPASPPRPTPRTFVP</sup>STADDEEFTVHQHGESDAAC<sup>LCTEVWTVFLVLCVALASKFQRMILVH</sup>

>Potri.019G002300

MGTQ<sup>NLMINKSTAKILLHLLLSLLHQITTA</sup>TLTDQELDFALLSLRSYG<sup>YTLFPNAISTDLRLQLLNQSSNATS</sup>  
TSTF<sup>TLFCPPDSLLFSVDLASTAPHYTKSFLHVSPSR</sup>LSTSD<sup>LRNLTAASGGTYIDSLVPNHRLLITNSLAQLN</sup>  
GTV<sup>DGSILNVRVRSVPDLFLGSDIAVHGLDGIL</sup>VAGFDEKVEDTSFE<sup>AATWSPANAIGSAEQNSPLAGRFP</sup>  
<sup>ARRRKGRNHRHNGRNGGIRRNHRGRRINGGHRRGVGRNVSGGTRGGGVTRGAFAMYNHRL</sup>

>Potri.014G071700

MATLQYS<sup>LLLSFTLSALVSTILA</sup>HNITDILSGFPEYSEFNKYLTQTKLADEINTRQTITVLALNNGAMTALA<sup>AAK</sup>  
HPLSVIKNALSL<sup>LVLDYYDPTKLHQISKGTTLSTTLYQTGNAPGNLGFVNITDLQGGKVGFGSAAPGSKL</sup>  
DSSYTKSVKQVPYNISILEISQPII<sup>APGILTAPAPTP</sup>SSVNITALLEK<sup>AGCKTFASLLQTS</sup>GVIKTYQSAADKGL<sup>TI</sup>  
FAPNDEAFKAAGVPDLSKLTNAEIVSLLQYHATATYSPFGSLKTSKDPISTLASNGAGKFDLT<sup>VTSAGDSVTL</sup>  
HTGIGPSRVAETVLDSTPLVIFTVDNVLLPVELFGK<sup>APSPAPAGEPV</sup><sup>SAPSPSPVASSPAPASVEAPSPLAASP</sup>  
<sup>PAPPVETPGGAPAE</sup>TPFGSENSTADG<sup>SA</sup>AVHVSVPVQVTVFATVICSILMS

>Potri.012G006200

MVEEIGLPIRKLPKNISLYPIASQSKIRKILLTRLKIKHDVNILSTIVLKPD<sup>VIDPVDPPGHGSDGLTRVNSENH</sup>  
SNGTYS<sup>SGQINSNSVLVALLD</sup><sup>SHYTELAELVEKALLQTLEDVVGKHNITIFAPKNEALERDL</sup>DPEFKR<sup>FLEPG</sup>  
<sup>NLKS</sup>LQ<sup>TLLLYHIVPNRINPSHNSSLQHHR</sup>TL<sup>CRDRVKLSSQESGEKLIDSAKIIQVNAVERPDGVIHGIERLLI</sup>  
<sup>PRSVQQDFNNCRSLQ</sup>SISAVKPEG<sup>APEVDP</sup>PR<sup>THRMKKPAPPAKPGSAPVLPIYDAMAPGPSLAPAPAGP</sup>  
<sup>GGP</sup>HHHFNGEKQVKDFIETLLLYGGYNEMADILVNLTSLATEMERLVSEGYVLT<sup>VLAPNDEAMAKLTTDQL</sup>

>Potri.019G008400

MINGFSTKKIQYFFNAIIVLKLD<sup>PVIDPVDPPGHGSDGLTRVSENHSNGTYS</sup>SGQINSNSVLVALLD<sup>SHYTE</sup>  
<sup>LAELVEKALLQTLED</sup>AVGKHNITIFAPKNEALERDL<sup>DPEFQRFLEPGNLKS</sup>LQ<sup>TLLLYHIVPNRINPSHNSSL</sup>  
<sup>QHNSTL</sup>CRDRVKLSSQESGEKLIDSAKIIQVNAVERPDGVIHG<sup>IKRLLIPRSVQQDFNNRRSLQ</sup>SISAVKPEG  
APEVDP<sup>PRTHRLKKPALPAKPGSAPVLPIYDAMAPGPSLAPAPAGPGGP</sup>HHHFNGEKQVKDFIETLLLYGG  
YNEMADILVNLTSLATEMGR<sup>LVSEGYVLTVLAPNDEAMAKLTTDQLSEPGAPEQIIYGLNIEASKPKKN</sup>

>Potri.018G097000

M<sup>APINPAISHITP</sup>TTTTLYFLLLLL<sup>ATTTTTT</sup>PILAITNL<sup>TALLSSFPDFSSFTSLITSIPSLTSDLSDRSALTLLVIPN</sup>  
<sup>SYLSSSLDLTRRLSPS</sup>ALADLLRYHILLQYLSSSDLHQVPPSGALITTLFQTTGRASSNSGSVNITRNPVTNA<sup>ITI</sup>  
<sup>SSPSP</sup>FSSSNATVLSLIMTL<sup>PYNVSIISVNSLLVPYGF</sup>DLMA<sup>SETRPTLGLNITKALLDGH</sup>SFLVAASLLSASGV  
VQEF<sup>EAD</sup>EGGAGITLFVPTDSAFSDLSATAISLQSLPADKKADV<sup>LKFHVLH</sup>SYYP<sup>LGSLESIVNPVQPTL</sup>ATED  
<sup>MGAGSFTLNISRVNGSVAIDSGIVQASVTQTVFDQNPVVIFGVSKVLLP</sup>KEIFGRNPVLTSPKGNTDMGN  
AQPPVSAL<sup>SPENSPKMLSSAP</sup>GVREEIKSGVGG<sup>LQWLSTLHLLCVVFCNCI</sup>

>Potri.006G174900

MARINPAISQITPTTTTLYFLLLLL<sup>ATTTTTITPILAITNL</sup>TALLSSFPDFSSFTSL<sup>LASTPSITS</sup>DL<sup>SNRSALTLLVIPN</sup>  
<sup>SYLSSSLDFT</sup>RR<sup>LPSSLTDL</sup>RYHILLQYLSSSDLHQLPPAGALITTLFQTTGRASSNFGSVNITRNPVTNA<sup>ITI</sup>

S**SPSP**FSSSNATVLSIKTLPYNVSIISVNSLLVPYGFDLMASETRPTLGLNITKALLDGRS**FFVAASLLS**ASGVV  
EEFEADEGGAGITLVPTDSAFSDLSETDVSLSQSLPADKKADVLFKHFVLSYYPGSLSESIVNPVQPTLATED  
MGAGSFTLNISRANGSVAIDSGIVLASVTQTVFDQNPVAIFGVSKVLLPKEIFGRNPVLTSKPGNSDMGNA  
LP**PAVALSP****ESSPKMLSSAP**GVREEKSGVGGGLQRFSTLPLLCALVVWYCI

>Potri.001G320800

**MERLQHLLISLYLLILSINLT**TTTA**QSPAPAPAP**GP**T**NVIKILKKA**GHFKTFIRLLKSTQLDSNLNSQLGNTNN**  
GLTIFAPSDSAFSALKTGTLRLTDQEKVELMQFHIVPMFISSSQFDTVSSPLKTHAGSGARFQLNVTASGN  
SLNISTGLTNTTISDTVYTDTHLAIYQVDKVLPLDIF**TPKPPPAPAPAPKLAESESP**DDAVSKKDISS**AVSF**  
VMHHDTVFFTVGTVVAISFSL

>Potri.012G127900

**MVPQFLLSFSLILSFLHCPPTLA**QSPAAAPGPPGPTNVTKILEKG**GQFSVFIRLLKATQEDVT**LN**Q**LNNT  
NNAITIFAPSDNAFSSLKSGTLNSLNDQEKAELVQFHIIPQYLSSSQFQTVSNPLTTQAGSGGRLELNVT**TTG**  
NSVNITTGLTNTSVSGTIYTDNQLAVYQVDKVLPLVDIF**TPKPPTPAPAP**EKPKKRSKAAE**SPDAP**EDNS**GA**  
VSLTVLNDVVFFGVGIVAAIFSL

>Potri.014G162900

**MKFSMIIVLSSTLLFSCTPLAYA**QKVA**SPPAPTPTSPAPAPSP**PYVNLTDLLSVA**GP**FHNFLNYLESTKVIDTF  
QNQANNTDEGITFVPKDDAFKNLKKASLSNLTQDQLKQLIFHALPHYYSLSDFKNLSQVSPVSTFAGAG  
GYALNFTDTSGTVHLDSGWSKTKVSSSVHSTDPVAIQVDKVLPL**EAIFGTNIPP****TPAPAPAPDT****SPTADSPT**  
**SDDSAGAGSAPGKSP****N**SSYRINGVGIWSQLVLAIAAGVLVFL

>Potri.015G129400

**MVPQFLFSASFILFLLHCPPTLA**Q**SPAAAPAP**GP**T**NVTKVLEKG**GQFSVFIRLLKATQEDVT**LN**Q**LNNT  
NNAITIFAPSDNAFSSLKSGTLNSLSDQEKAELVQFHIIPQFLSSSQFQTVSNPLTTQAGSGGRLELNVT**TTG**  
NSVNITTGLTNTSVSGTIYTDNQLAVYQVDKVLPLDIF**TPKPPTPAPAP**EKPKKRSKAAAS**P**ESPADTS**GA**  
SFTVLNNVVFFGVCMVAAIYSL

>Potri.014G168100

**MPRPLPLLALISLVLLASTTTVNA**HNITRILAKHPQFSTFNHYLTVTHLAAEINRRQTITVLALDNAAMSSL  
SKQLSVYTLRNVLSLHVLDYFGTRKLHQITNGTELTATMFQATGSAPGASGYVNITDLNGGKVA**FGAEDN**  
DGKLNNAVYVKSLEEIPYNISILQISQPLNSAEAE**APTAAP**TLNVTAILSNO**GCKAFSDLLIASGAHTT**FEENV  
GGTLVFCPTDPVINGFMPKYKNLTAPQKVSLLYHGIPYQSLQMLKTSNGIMNTLATNGANKYDFTVQN  
DGEVVTLETKVTTATITGTVKDEEPLVYKINKVLPLRELFA**APEKKAPAPKGEKD**VAD**GP**NAD**AP**SDESD  
DQTADND**N**GVNKMGGGRLAVVAPSFFFVVMMFFLFD

>Potri.004G210600

**MRQSSSLLFSLILFFLHCTKTSG**Q**SPAAAPVMPPPTTPVKAPPTAPSQA**PSAQVAT**SPGP**VDVIKILQKAG  
HFTVFVRLMQATTEDTELNKELNKTNNGITIFAPSDSAFSLN**KAGFLNALSD**EDKTELVKFHVLPALISSSQF  
QTVSNPVRTQAGTGPRVTLNVTTTGNFVNITTGLTNTSISGTVYTD**SQFAIQIDKVLFP**LDIF**TPKPAPAP**  
**APELGKPRKAAPGVESPTAPKDISGALTP**LILHNNALLAVSCMVAAIFS

>Potri.016G088700

**MRKQLSPFVPFLMFFLYSSTTFA**Q**TPSPAPS**GP**T**NITAILAKA**GQFTTLIRLLKSTQEADQINTQLNNSNQ**  
LTVFAPTDNSFANLKAGTLNSLSDQKQVQLVQFHILPNFLSMSNFQTVSNPLRTQAGNSADGEFPLNVTT  
SGNQVNITTGVNTATVANTIYTDGQLVVYQVDQVLPLDLFGT**APAPAPAPSKPEKD**V**PAKAP**AGSKEDAS  
VDS**S**GASIATVSFGVVLIAAISLKL

>Potri.002G223300

**MEFSMIIMFSSTLLFLCTPVAYA**QTAA**SPPAPTPTSSSPAPAPT**PYVSLTDLLSVA**GP**FHTFLSYLESTKVV**D**  
TFQNQANNTDEGITFVPKDDAFKNLKKPSLSNLTQDQVKQLIFHALPHYALADFKNLSQVSPVSTFAGA

GGYALNFTDVSGTVHLDSGWSKTKVSSSVHSTDPVAVYQVDKVLLEAIFGADIPPAPAPAPAPETSLAAD  
SPSSDSTGDGSAPGTSPNSSYRIFGVDIWSQLVLALIGVLVFL

>Potri.006G129200

MRKQLLSPFVPFLMFFLYGSTTVAQTPSPAPSGPTNITAILEKAGQFTTLIRLMKSTQEADQINTQLNNSNQ  
GLTVFAPPDNAFTNLKAGTLNLSLSDQQKVQLVQFHIIPNFFSMSSFQTVSNPLRTQAGNSADGEFPLNVTT  
SGNQVNITTGVNTATVANTIFTDGGQLVVYQVDQVLLPLDLFGTAAAPAPAPSKPKDKVPAKAPAGSKEDAS  
VDASGATIATVSVSVVLIAAISLKL

>Potri.009G012200

MRPQSFILALSLIFFLHCTKTLCQSPAAPAMAPPKTPVKAPPADSSQAPSAQVATSPGPGVDVNKILQKA  
GHFTVFARLMQATTEDTELNKLNTTNGITILAPTDNAFSSLKAGFLNLSDEDKTELVKFHVLPAFISTSQ  
FQTVSNPVRTQAGTGPRVTLNVTGTFNFISSGLTNTSISGTVYTDSQLAIYQLDKVLFPKDIFTPKPPAPAP  
PEPALGKPRKAAPDAESPTAPKDISGAPALLFLHNNALLAVSCAFGAIHS

>Potri.019G122600

SYTAWHHTNVTKILEKAGHFTIFIRLLRSTQEENHLFSALNDSSTGLTIFAPTDSAFSELKSGTLNTLSDGDKS  
ELVKFHVVPFTLSTSQQFQTVSNPLGTWAGTGSRLPLNVTSYPNSVNITTGLTNTSLSGTVYTDNQLAIYKIEK  
VLLPKDIFASNAPAPAPVAPAPEKPTKAVPAVTVESPAAPVDISSAVWFMHNNVVGSGVIVAATVFSL

>Potri.013G151500

MKQQHSLSSFSFFLLHLCANTFAQSPAATPAQAPAAVVAQPPAATPTQAAQPHGITNVTKILEKAGHFTIF  
IRLLRSTQEENHLFSALNDSSTGVTIFAPTDSAFSELKSGTLNTLSDGDKSELVKFHVVPFTLSTSQQFQTVSNP  
LGTWAGTGSRLPLNVTSYPNSVNITTGLTNTSLSGTVYTDNQLAIYKIEKVLLPKDIFASKAPAPAPVAPAPA  
KPTKAVPAATVESPVAPVDISSALMFHNNVVGSGVIVAAAMFAL

>Potri.013G151400

MKQQYSSISVSFLLFLHYTNTFAQSPAAPAAQAPAVVVAQPPAATPTQAAAPHGITNVTKILEKAGHFTIFI  
RLLRSTQEENHLFSALNDSSTGVTIFAPTDSAFSELKSGTLNTLSDGDKSELVKFHVVPFTLSTSQQFQTVSNPL  
GTWAGTGSRLPLNVTSYPNSVNITTGLTNTSLSGTVYTDNQLAIYKIEKVLLPKDIFASKAPAPAPAPAREKP  
TKAVPAANVESPVAPVDISSAVTFMHNNVVVGSLVIVAAAMFACHVEGF

>Potri.013G014200

MKQQYYSLFSFSFFLLFLHCTTTFAQTSPAATPAQAPAVVVAQPPAATPTQAAQPHGITNVTKILEKAGHFTI  
FIRLLRSTQEENHLFSALNDSSTGVTIFAPTDSAFSELKSGTLNTLSDGDKSELVKFHVVPFTLSTSQQFQTVSN  
PLGTWAGTGNRLPLNVTSYPNSVNITTGLTNTSLSGTVYTDNQLAIYKIEKVLLPKDIFASKAPAPAPVAPAP  
EKPTKAVPAATVESPVAPVDTSSALMFTQNHVVGSLVIVAAAMFAMFAL

>Potri.013G151300

MKQQYSIFSFSMLLLSLCYINTFAQSPTAAPAAQAPAVVVAQPPVATPTQAAAPHGITNVTKILEKAGHFTIFI  
RLLRSTQEENHLFSALNDSNTGITIFAPTDSAFSELKSGTLNTLSDGDKSELVKFHVVPFTLSTSQQFQTVSNPL  
GTWAGTGSRLPLNVTSYPNSVNITTGLTNTSLSGTVYTDNQLAIYKIEKVLLPKDIFGSNAPAPAPVQAPAE  
KPTKAVPSANVESPVAPVDISSAVTFMHNNVVVGSLVIVAAAMFACNVEGF

>Potri.019G123100

MKPQYLLSSFSIFLLFLHCTNTFAQSPAAPAAQAPAVVASPPAATPTQAAAPHGITNVTKILEKAGHFTIFIRL  
LRSTQEENHLFSALNDSSTGLTIFAPTDSAFSELKSGTLNTLSDGDKSELVKFHVVPFTLSTSQQFQTVSNPLGT  
WAGTGSRLPLNVTSYPNSVNITTGLTNTSLSGTVYTDNQLAIYKIEKVLLPKYIFASNAPAPAPVAAAPKPT  
KAVPAATVESPAASVDISSLIFTHNLLVGSVGLLASAMFSL

>Potri.019G121200

MKPQYLLSSFSILLFLHCTNTFAQSPAAPAAQAPAVVASPPAATPTQAAAPHGITNVTIILEKAGHFTIFIRLL  
RSTQEENHLFSALNDSSTGLTIFAPTDSAFSELKSGTLNTLSDGDKSELVKFHVVPFTLSTSQQFQTVSNPLGT

WAGTGSRLPLNVTSPNSVNITTGLTNTSLSGTVYTDNQLAIYKIEKVLLPKDIFASNAPAPAPVAAAPEKPT  
KAVPAVTVESPAASVDISSALIFTHNLLVGSVGLLASAMFSL

>Potri.019G121300

MKQQLISSFSIFLLFLHCASTFAQIPAAAPAPAPAVVVAPPPAATPTQAAAPHGITNVTKILEKAGHFTIFIRL  
LRSTQEESHLSALNDSSTGLTIFAPTDSAFSELKSGTLNLRDGDKSELVKFHVVPFTLSTSQQFQTVSNPLGT  
WAGTGSRLPLNVTSPNSVNITTGLTNTSLSGTVYTDNQLAIYKIEKVLLPKDIFTSNAPAPAPVAPAPEKPS  
KAVPAVTVESPAASVDISSALIFTNNILVGSFGLLASAMFSL

>Potri.019G123200

MKQQLISSFSIFLLFLHCASTFAQIPAAAPAPAPAVVVAPPPAATPTQAAAPHGITNVTKILEKAGHFTIFIRL  
LRSTQEESHLSALNDSSTGLTIFAPTDSAFSELKSGTLNLRDGDKSELVKFHVVPFTLSTSQQFQTVSNPLGT  
WAGTGSRLPLNVTSPNSVNITTGLTNTSLSGTVYTDNQLAIYKIEKVLLPKDIFTSNAPAPAPVAPAPEKPS  
KAVPAVTVESPAASVDISSALIFTNNILVGSFGLLASAMFSL

>Potri.019G121100

MKQQSISFFIFLLFLQCTYTFAQSPAAAPAPAPAVVVAQPPAATPTQAAAPHGITNVTKILEKAGHFTIFIRLL  
RSTQEENHLFSALNDSSTGLTIFAPTDSAFSELKSGTLNLTSDGDKSELVKFHVIPFTLSTSQQFQTVSNPLGT  
WAGTGSRLPLNVTSPNSVNITTGLTNTSLSGTVYTDNQLAIYKIEKVLLPKDIFASNAPAPAPVAPAPEKPA  
KAVPAANVESPVAPVDISSAVWFMHNNVAGSVGIVAAVFAL

>Potri.019G123000

HIAQRHKHEATVNLIIFYLLFLQCTYTFAQSPAAAPAPAPAVVVAPPPAATPTQAAAPHGITNVTKILEKAGH  
FTIFIRLLRSIQEENHLFSALNDSSTGLTIFAPTDSAFSELKSGTLNLTSDGDKSELVKFHVIPFTLSTSQQFQTVS  
NPLGTWAGTGSRLPLNVTSPNSVNITTGLTNTSLSGTVYTDNQLAIYKIEKVLLPKDIFASNAPAPAPVAPA  
PEKPAKAVPAANVESPVAPVDISSAVWFMHNNVVGSGVIVAAVFAL

>Potri.009G012100

MYFFYSVQYRPRLCPRMQPFILLFWLLFLHACSQTFCQSPAQSPAATQTKAPVPPPPAGPTDTIQILLKAG  
RFLSFVRLMKATHVDTQLFSQLNSSTDGITMFAPNDNAFSSLVAGAVGSLNDREKLEFVQFHILPRFLSISD  
FQTLSPVKTLAGSDRKFLPTITSDNSVTVSSGLTKTSISNTIYTDKQVAIYEVDKVLVPKDLFPAPPPAPAPA  
RPLAEPDPVAPRDASSALVIAWQHRVNVVLFAGGLYIAALVMDP

>Potri.013G120600

MATTPLSFFLLSLLSLNAQAQTPTAPAPTPSGPVNFTAVLVKGGQFATLIRLLNNTQTLNQIENQLNSSE  
GMTIFAPTDNAFNNLKAGALNGLNQEQVQLLQYHTLPKFYTMNLLVSNPVPTQASGQDGVWGLNFG  
TGQSNQVNVSTGLVEVQINNLRQDPLAVYPVDKVLLEALFGVKPPTASPPAPSSKSNSTVAAAEPTG  
KNSAGGRNVALGLVGLGLVCMGILS

>Potri.019G093300

MATSPLSLVLLSLFLSLHAQAQAPAAPAPAPSGPVNFTAVLVKGGQFVTFISLLNKTQTFNQIENQINSSS  
EGMTIFAPTDNAFNNLKSGALNGLSQQQVQLLQYHMLPKFYLSNLLVSNPVPTQASGQEGVWGLNFG  
TGQSNQVNVSTGLVEVQVNNALRQDFPLAVYPVDKVLLEALFGVKPPSASPPAPATKGSSSGKSNSSDTA  
AEPSPGKNSAGGRNVALGLIFGLGFVSMGILS

>Potri.019G120800

SPAAAPAHAPAVVVTQPAAATPAQAAAPHGITNIHPRGNHLFSALNDSSTGLTIFAPTDSAFSELKSGTLNT  
LSDGDKSELVKFHVIPFTLSTSQQFQTVSNPLGTWARTGSRLPLNVTSPNSVNITTGLTNTSLSGTVYTDNQL  
AIYKIEKVLLPKDIFASHAPAPAPVAPAPEKPAKAVPAANVESPVAPVDISSAVWFMHNNVVGFMESVE

>Potri.015G013300

MKQLISFSFSLVLLFLHCTQTLQPPNAAPAKAPAAATVPPPAATSAQASPPVMVPVQVSKGPVNVIKILQK  
AGHFATFTRLIKSTQEDIQLFSQLNDSRDGVTVFAPTDGAFSAIIKSGVLNSLTDHQKIELVQFHIIPRILTAN

FQTVSNPITTLAGSGNRFALNVITTENMVNVTTGLTNTSVSAIVYTDSQLAIYQVDKVLPLDIFAPKPLAPA  
PAPPKPKDDGAESPMVPEDTSGVICMVHNTLLMFGVGLVAAAIPL

>Potri.012G015000

MKHHFSVFLFAILLHCTQLSQTPATAAPAKAPAAASAPPPAATSSAQASPPVMVPVQVSKGPNVNIKIL  
QKAGGFAVFIRLIKSTQEDIQVFSQLNDSRDGVTIFAPTDGAFSAIIKSGVLNSLSDHQKIELVQFHIIIPRILTT  
ANFQTVSNPITTLAGSGSRFALNVITTENMVNVTSGLTNTSVSAIVYTDSQLAIYQVDKVLPLDIFAPKPLA  
PAPAPPKPKDDGAESPLVPEDTSSAVSCIPLNSLIIFGAGMVAAVFTL

>Potri.019G122800

MKPQYLLSSFSIFLLFLHCPNTFAQSQAAAPAAQAPAVVASPPAATLTQAAAPHGITNVTKILEKAGHFTIFIRL  
LRSTQEENHLFSALNDSSPGLTIFAPTDSAFSELKSGTLNTLSDGDKSQLVKFHVVPFTLSTSQQFQTVVGYHL  
TSQSYTNSVNITTGLTNTSLSGTVYTDNQLAIYKIEKVLLPKDIFASNAPAPAPVAPAEKPTKAVPAVTVESPA  
ASVDISSALIFTHNLVVGSVGLLASAMFSL

>Potri.019G120900

MKPQYLLSSFSIFLLFLHCPNTFAQSPAAAPAAQAPAVVASPPAATPTQAAAPHGITNVTKILEKAGHFTIFIRL  
LRSTQDENRFLFSALNDSSSTGLTIFAPTDSAFSELKSGTLNTLSDGDKSELVKFHVVPNSYLLPSSRPLSGTVYT  
DNQLAIYKIEKVLLPKDIFASNAPAPAPVASAEKPTKAVPAVTVESPAASVDISSALIFTHNLVVGSVGLLAS  
AMFSL

>Potri.001G037800

MSLKSSSLFALCFSSFLFNTVRA SNITQILSQYPDFSTFSSYLTTQLAGEINSRQTITVLVVENGNMSPLSG  
KPNGEIKNVLSGHVILDYDVAKLQKLQNKMTAMLTTLFQSSGQAKGQQGFLNVTVLGSNSVAFGSAVPGS  
SLSSNLVKSVSQPYNISVLQVSNIIVSAGTGNANSTTSPVPVGPVKTSPTPASSPNKPPSTSNPPRPSPTTA  
DGPAADSPAPSPAMDGPAAATPAADGPLADAPLDPKSDASVLTGNNLALLALILLSAFFLA

>Potri.006G276200

MIHQYCHCYCWLKTLNRYKLSTLLFIPYITRPLILCRLRNSFSTMNSPATHFWSTSLHAYKGLCIISFEFKHK  
GSDNNKEGFGFIFLAKMDSKASSLLFIAFLCLISTSTAFNSTKILAQYPEFANFNDLLSQSGLAQEMNSRQTI  
TVLVLDNGSIDGLSGRPLDIKRILSAHVILDYDQIKLSKLQKASTIVTTLYQASGVADNRQGFLNISRTAEGI  
KFGSAMKGAPLVASLVKSIYSQPYNISVLQVSEPIETPGIENMAPP PPPGTAAVPKKAPAPAPSTKTPPAAPP  
TAKTPAKSPAKSPSKAPAPSKEGPTPTKAPAEGPVAADGPVAAGGPVADVPAESPEADTEVAEEAPAVAP  
AKAASSRMHVAGATVVIGLFACIMGF

>Potri.013G152200

MASCSHWWHAPVYFIASAVLAFIAISTAMNSPSNATRPTPSNYLSLNASRTLRESGFNIMATLLISPSEMFF  
LSPNTTIFAIKDSSLVNTSLPPWFLKNLLQYHTSPLKLSMEDVFKKPQGSCFPTLVDRKKLAVTKIDAKERLAEINH  
VLVSHPDMLVERRITIHGVLAPFSSLRSKDVYFGWESIQAPICDANSSLVSDANGPRIILEWTRIIHLLSSHFRVSF  
AIGLNSVLDRILADHKNLSSVTIFAPPELEFVASSPMLEKIVRLHILPQRATYIELAALPDKQRLRLTLLPDEDLKITK  
GVGVTTQGLAINGVEIAAPEIFSSKEFIVHGTQAFKIAKFPNASR\*

>Potri.005G079500

MESSPKLSILLISLYIIISSTSIDGVETTFSSNLSPQSPQPQISTSDHFDHDSFSHTNLLAPILSHLGFTQLAMA  
SLPADSTTTAWSGPSTLFAPSDSSLRTCFSCSIDLLHEHIVPGLFSIDYLRKLAFGTKIETLSPGRCTVTSTLKNDS  
ATPSTVKVFIGGVEITHPDLFNNGVLIHGIQGYIAPLSPFSCDFERLSSLSPFQEGVTPHVTSTTHQQGIGTLVQ  
PAIMRLMLRDAMLRLRSNGFTILSLAMRVKYPELTNLVNMVTFALDDVSIFSGSHGYISSVRFHIVPNHYLSTADL  
ERLPVGATLPTLERGQALVVTSAAGLTGFNTAVPMRINYVRVKVPDVMRNLIKVVHAVYLPFPRIHPTSAAFD  
EMMGIGGEGQNIVAAEDGACSAVFEEDGSCGTVPPMPAQVKPSVVVRSEDDHHGL

>Potri.001G440800.1

MAKYLFSLLLLTITTTATSTFNPICTFSPTPSPTSATTPAPITNSSTNIALSPTFAPSPIITIPAPSSAPTPINNTTTTT

TTTSTTLTPPTTPSTARPTIPTNKITLPTFAPSRAPPTIITPILGSPAPPTISSAFTTTPTFGSPAPPTTNSSIFTAT  
FSLPPTPPSTFTRQQDDLKFVFQEQIYNIIDAILGTGDFKNWANALGMADSTTFPISATFFIPSDNLSPTTTSADP  
DIFPYHIVPQRLSFADLQQFKTSRLPTLLFDKSILITNNSASNFTLDGSRLTHPDIYTNAAITVHCIDNLLDHSVYG  
TESGKNSSKPDAVGPPPTPASPPRPTPRTFVPSTADDEEFTVHQHGESDAACLCTEVWTVFLVLCVALASKFQR  
MILVH

### Monocots

*Brachipodium distachyon*

>Bradi1g06290

MAGAPAYTGAAVVLLLFVLAISGSAA DTSPEEPTLPSSSASAAVDAATAVVNGSGAGISSNSVLVALLD SH  
YTELSELVEKALLLQLEDVAVGRHNVITIFAPRNEALERDLDEPKFRFLEPRNLKSLQSLLLFHVLPSSRHPAAS  
WPASAAHPTLSGEDLELAAGSNGSMRVAHASVTRPDVAVLRPDGVIHGIERLLVPRSVQEDFNRRRSLAAIS  
AVLPTGAPEVDPRTHRLKKP APPVLPG APPVLPVWDAMAPGPSIAPAPAGP NSGKLHFDGHSQVKDFI  
QTLVLYGGYNELADILVNLTSLATEMGRVSEGYVL TVLAPNDEAMARLTDDQLSEPGSPENILYYHMIPEY  
QTEESMYNAVRRFGKVRYDTLRLPHKVVAREADGSVKFGQEGSAYLFDPIYTDGRISVQGIDAVLLPED  
DTKKTSTT TPAAPVRKAP AVTGKSKNKLRRGKLMEATCHMAGIFGQRSRLTSCQ

>Bradi1g57040

MGAPLYGAVLLLSLFLAASA AVPQPQKPTTLPSSSSTAAAAGSTTTTTTTTTSSSSAAGVNSNSVLVALLDSR  
YTELSELVEKALLLQLEDVAVGRGNVTIFAPRNEALERDLDEPFRAFLQPRNLRSRQRLLLFHVLPSSRLSSSQ  
WRSAASTLSGEHLESLSDSSTAMLAGSAAVTHPDVAVVRPDGVIHGIEKLLIPRSVQEDFNRRRSLAAISA  
VLPTGAPEVDPRTHRLKKP APPVLPG APPVLPVWDAMAPGPSIAPAPAGP NSGKLHFDGHSQVKDFIQ  
TLVLYGGYNELADILVNLTSLATEMGRVSEGYVL TVLAPNDEAMARLTDDQLSEPGSPENILYYHMOVPEYQ  
TEESMYNAVRRFGTVRYDTLRLPQKVTAREADGSVKFGHGECSAYLFDPIYTDGRISVQGIDAVLFPPVD  
GDAAGKNAAGAPARARKAPAVTGSAKPKLRRGKLMEGACKVIAMFGQRSRYTSCQ

>Bradi4g34420

MDARRRLCLVAAVLLAAAAAEG YNITKILGEHPEYSQFNKLLTQTRLAADINKRRTITVLVANGDMGAL  
AAGRTLQTIHILQMHVLVDYYGAKKLHQLAHGVTASSMFQESGAAPGMSGYVNITQHRGGHVTFTAE  
DASDSASPVSVFKSVKEIPYDLSVLQISKVLS SPEAEAPVAAPAP VNITELLSKKYCKSFAGLLAADADAFSTV  
NATKDNGLT LFCPVDAAVASFMPKYKNLTAKAKTAILLYHAVPDYYSLLQSLTNSGKVSTLATSSVAKKDYSF  
DVSKDGETAALDTKVITASVTATVKDDDPLAVYAVSKFLQPK ELFKVAKDL APAPAPEGP KKKSSKKKPSAAS  
SPSDDDDSDAADS PDDSGSDVDAADKAG AAPMLARWVTAATAVAALALAT

>Bradi2g16560

MAPPSRVLLLAALFLAASTMATA QKAKAK PAPA AADGPGAAAADAGPPTNVTSVLEKSGKYGTFLRLHE  
TRVDTQLNSQLYDSYNGL TILAPTDAAFEDLPSTGMNGLSSQDQIQMMLYCVLPRFYSLSMLGTLNGKVS  
TQASGSDGPYEEKIKPSGSNVNVSTGVKGNMMLSTIVSKEFPLAVYSVDKVPLPYALFGPQPP TPAPAPAP  
AP SKSKSKKKKKVIADPPESDSDSTAS DTKSAAAARVSASRWVAAAALAVLGAAGGVLL

>Bradi4g39640

MASYFAASLLVALVSVTTIAG APSP SAVDGDIASTTQEMQQARYFTFVMLIRMVQEIQIPRNT TFLMPSD  
RLLSTASVPGNQVLDLLLRHVPVAVLMFADLNRLPNGTVVPTRHTNQMVITITKREHRQLYFNNIELTSPDIC  
RGGDSFRCHGINGVLRTATRRRGRGAACPRSN APTTAAPEPASAANQSLGTPSLTPGVVSATSP AVEPTES  
SQSSDT SASRGLSCTTLILVLMISIF

>Bradi2g54620

MGRGVPPDSRPPLGPLVLLVLLAAVLPSAAG VNVAAVLAAP PNFSDFLRLTSSPVAGELTGRSSLTLLAVP  
NANLPRSPSAFAAASGADLADVLRVHVLLEYLSPSCLARLPASGKLVTTL FQTTGRAPSDLGAVNLTSSAAG  
GHSSTVVVHSPAPSPFGSNATVLGAVTREPYNISVLAVGGILVPSGFDIAASGSESRAVNITRVLADARGF

NVAASMLEASGVADDFEADERGAGITVFVPTDDAFAAGGLPDAAGRLQSLPADRKAVVLRFHVLHSHYPL  
GSLESIVNPVQPTLATECTEAGRFTLNITRSNGSVAIDTGVVQASITRTVFDQNPVAVFAVSKVLLPKEMFG  
QGNTASAAAAAAPPAAAMPDASDDGTPPTKLSSPPVWATARGANWSCIGFVYLQLHLLLLLLLLLPLG  
N

>Bradi2g23270

MRGQIPPILLVVLAAAALLPPQAAAAVDVAAVLAPFPDLAGFARLLASSPVGRELAGRSSLTLLAVPDRDLP  
QSPSAFAAAAAGADLADVLRYHVLLEYLAPADLRRLPASGKLVTTLFQTTGRASSDLGAVNITAGGSSLSSTLA  
VVRSPAPFPA SNATVLGSITAVPYNLSVLSVSGLIVPSGFSLSASESRPAPAVNITRILSDARGFNVAASMLEA  
SGVAEEFEDDERGAGITVFVPTDDAFASLPAGPGDRLQSLPAERKAVVLRHVLHSHYPLGSLESIVNPLQP  
TLATEFSSQAGRFTLNITRANGSVAIDTGVVQATITRTVFDQNPVAVFAVSKVLLPKEMFTRSTADPADIVA  
AGVAAIAPPPPAAGSMPPESARTPPTKLSSPPGMRGGDGGNGNLTALPSAMGRRARIGWWCIALLC  
CF

>Bradi4g33490

MIPPKDLQGRRSRANSVVMELKGAIFTTAVLATLLCSPALAQKSPAPASVALPPTMAPAPAPADYVDL  
AALLGVAGPFHTFLSYLQKTNVIETFQRQANKTKEGITIFVPKDSAFALKKSTFSNLTSQDKMLLMYHAL  
PEFYSLAQFRNLSVLNPVNTFAGAPYTLNLTDDMGITISVKSMWSKPTISSSVYATDPVAIYSLNKVLLPMQI  
FTKDPPLAPAPAPAPESGASDLAPSPGGKAGAGKGDSTAGYGLGVGAVNCLLAAGGLMMFLW

>Bradi5g18950

MAAPRPLLFLALLSLAFAATCCAHNITGILDGFSEYSLNSYLSQTKVCDEINSRSTVTCLVLTNGAMSSLSVN  
LSLADIKNALRLTLDDYDPKHLHSLHGSELTTLTYQTGDASGDMGHVNITNLRGKGVGFASAAPGSKL  
QSTYTKSVKEEYPYNLSVLEVSDPITFPGLFSSPSAASSNLALLEKAGCKQFARLIVSSGVIKTYQAAMDKGLT  
LFAPNDDAFQAKGLPDLKLSANLVTLEYHALPQYAPKASLTKMGGIPTLASTGSGKYDLSVVTGDDV  
SMATGMDKSRVASTVLDDTPVAVHTVDSVLLPELFGGAPSPAPGASADAPASAPTEASAPAPSPKAGK  
KKNKGKSPSHSPAPPADSPDMAPADAPDGDEEADKVHDKKNGAAALAVSFAAVIASVALVGASFL

>Bradi3g39740

MEFRAGLFTAAMVAAAMIILSSTPALAQKAKDKSPAPPADILPPSPAPAPSPHIVNLADLLSVAAGPFHTFL  
DYLEKTDVLKTFQSKANDTKESAEGITIFVPKDSAFSSLRATTFANLTGEELKSLVLYHALPKYYSLAEFNKLS  
LNPVPTFAGSQYTLNLTNDMGSIRVKSMWSNPKISSSVYSTRPVAVYEVDKVLLPMQIFKSDPPLAPAPAP  
APVDAKADDDAALSPASGKAASAKAKAGEKASQAGGGYLAVAAAGGVMMMLLW

>Bradi2g46120

MAARRTGIAAVAAAAFFAMVSVSLAQAPAPDATPSGPPNVTAILVKGQYTTFIRLMKETQQDTQLNSQL  
NNSFNGNGYTVFAPTDNAFNLLKPGTLNLSLQQQQVALVQGHVLPQFYSMESFQTASNPVRTQASGQD  
GPFTLNITATANNQVNVSSGVSEVTNNALSDKKPLAVYSVDKVLLPLEFFGAKAPAAAPAASKDGKTKKG  
EAASGPAGSDDEASPTSAAGGARAVAWGVAAMA AVLGYLL

>Bradi2g16570

MATARSVLVAVLLSLALPAVLQKAPAAAPAPSPASTAPNVTAVLDKAGQYTKFMRLMKSTQQDTQLNSQL  
NGSDTGFTVFAPTDNADFSLKAGTLNLSLQQEQVSLVQAHVPAFFSMESFETASNPVRTQASGADGPYT  
VNVTSNGQVNVSTGLVSTMVGTALRKEKPLAVYSVDKVLLPYDLFGPKPPASAPPAPGKKAPAKGGAK  
APAGEEDSAPASKASGGVVGFAWSFLAAVAAACL

>Bradi5g13100

MNLAVSLLIATALLSLPLAGAHRRVLADSPAPPPQSFHGSRRNLTYILAPGGRFQTFVMYLQQTGLVEV  
FEIQAHRTHHGITILVPTDRAFAAIEPSVLSGLKKHQVKSMMYHALARHYALKEFDALSRVSPVTTFAGGL  
YTVNVTYDAGAIRVVSSWADAKVVRPVYEMPPMAVYEIDRVLLPDAIFHAQPAVEAIPSPDGTTPPSDG  
DATKTPGGKAGGTLDAKSACRALGRAASYVIAALCAVAL

>Bradi2g34650

MAMQQTQTPSMSTPMILLALLCLSAARSAAHQTPAATAPAPATAAATPKTIKAVLTKAQQFTKFLQLLQST  
QEDSQIDNQLKGKSSSGGLTVFAPPDNAFSAKSGTLNALSDAQKTSLVQFHVVSQIPMAQFDTASNPLR  
TQAGETRPGKYPLNVTADGQQVNISTGVVNASVSGTVYTGDRLVVYQVDKVLLPWALYGPALPPAPAPSP  
VEKEKEKGKVGPAAADAPAAADAATASEAAVPARPGGVWGQGGVFGVAVAVAAAWFVV

>Bradi2g00220

MEAMQRSFLVLLVISAAITASAQGPTAAPTTPAPAPAPAGTTKTTNITGVLAKAGQFNTFIRLLRSTGVA  
AQIDNQLNSSQTGGLTVFAPTDNAFTSLASGTLNLSLSDSQKNSLVQFHVLSAVPMSQFDTVSNPLRTQA  
GSSSPGEYPLNVTATGQQVNISTGVVNATVDNTLFTGDQLVVYQVNQVLLPMAIAGKKADA PAPAPLGP  
KKTTPVAADAPGGADADTDSTASRAAGGGGGGVVAVAMALASCVLCWGL

>Bradi5g13110

MELKRAVLVSALLCLALSRGALSQRAPIITITPAPAPAPRHVDLAELLSLAGPYGTFLDYLTCTDVIKTFQSQA  
NDTEEQGGHGITVFAPQDSAAFAVDSAAALSNTADRLRLMLHHAAPKYPLSVFSALAASSTPVSMFAYS  
VNVTDKAGKTGVVSGWAAAKLVSSVYSTRPVAVYALDRVLLPKEIFPTAPEVAPVPVPAPAPVPGKAMDA  
APGAGAKDNAGGKSSSSRVGTGRLLGSLVLMVSGVLV

>Bradi3g39010

MRRVHLAAVLVLLPIAVSAGGAKAPAPAKAPPAPNITAAMEKGGCKAFAALLSASPDASSTFQSAIDG  
GVTAFCPSDGAVKSFLPRYKNLTAAGKAALLSHAVPVYYTRALKSNNGVMNTLATDGGAGNFNLTVQN  
VGDQVSVKTAGKGGAARVESTVYDKEPVAVYGVDAVLEPVELFEPAEVESAPAPAAHKKAAPKKARHG  
DDVADAPSPDADDDDEEDDAPPA DQRKSSKNAAAPPGGQCLRWLAVVAVAAAAVLA

>Bradi3g05730

MAPPPPNVKTRPFLITLAAIVLLPAASA DNAAAPFNITKILSAYPEFRVFSSLLNETGLARAI DRCKMVTILA  
VNNTGV PDTVLRAPRPLLFDLLALHVVLDYLDPEKLDAMRLGRTGN GSMVTTLLPGPSDKFLRVAGGDKS  
RITFSYAGPGGRWPRNATLIRVVTSQAFSVMVLEVSGLILPTAVPATTAAARFDIILSSYPEFSVYSGLLRETG  
LASILDGRRVVTVLAPNNTDIPKVIHTLPRLLADLLALHVIPDYLDPEKLDALRRGRTGDGSSVMTLLPGP  
GLRLLGIAGEGVPADVDTTSPLDITKILSSYPDLTAFNSLLTDSGLARAINARPTVTVLATNNTALADSLRGLR  
HLPEPALVDLLALHVVLDYLDPEKLDALRRGRTGGGSIVTLLQESGRARGRGVGFVRVSGGEDGRITFSCS  
TPGGGGPRNATLVKVTTQAFSVLVLQVSNLILPPGIVAPAPQPRARRHMFLLP SPAPAPAPRYPPVSGV  
PPPVVEEPEPNLTDATPPPSGVIPLPSAHGGVS AKIPTAAGRHRRAAGIWWSGASAALGITAYLLGRL

>Bradi1g76630

MAGERPVVAPGVVVLLCCLAAPMVRG GGGGGGVQHNITSFLNGHPEYKLYNKYLTETRVCD EINARAA  
VTCLVLNDGAMATLVADAGESSLAGIKAALRLHSLLDYWDTKLRLSTTTNLTDTFFQAAGDAMGT VKIAK  
LDSGDFGFASANKGAKFDATLVKAVKQTPYDFAVLEISAPIEFDGLFDPDAANLTRLLEKAGCKRFAALVA  
GNPGVLKAYQAAMATGLTLFAPNDDAFVAKAGTPDVGKMEKDDLVRLLMYHAVPAYEPKPSLKLKAGA  
RPLRLASTAAGEYNVTVVARGDDVSLDTGVRKSVAATVLDEVPLCVLTVDSLLMPVELFADAPMPAPAP  
APAMAPADAPLGSSSSPPAPPPADAPSEVADHKAKHVKSTAALRSIGAVAVALCSVV FASLL

>Bradi4g33040

MHHSQPQLAIALLFVVVVALPLVMAAGKAAPAPAAAAPNATAAMAKGGCKAFADLIAASPDAASTYQS  
AADGGVTVFCPSDAAVRAFMTRYKNLTADGKASLLFHAVPVYYSPGSLKSNNGVMNTLATDGASKNFN  
FTLQNEGEAVAIKTGASPGGGVARVEATVMDRDPVAVYRLDAVVEPELLEFKPVPAPAPAPAPADAPRAG  
KGGARRHPAAPAVADAPGPDADDDTAPADKKKDSKSAAPGAPRFRWF AAALAAVAVASVLV

>Bradi1g43531

MSSSGILPCSSLLLLLLVTLVSAPPPCHGAAAGQQPTHNITDILLAANANFTDFSSALASANLTAQIDGR  
TPITILAVDNAAVAQLKARRLAPESLAHVLSLHVLLDYFDDARIRHLNGSFNLAATLYQTSGAAPGSAGFVN

VSSAAGSDGRVSFLPSGAAPAYAVFYQKSVKESKYDISVLQVSGVVS **SPA**AEGKA**APAT**PP**QAAT**PAP**SPA**  
**PV**AAAL**AP**VAK**PAPAPARE****APAPSP**KGNT**TAPPAE**AE**PEPPADEPPA**DQQKNAASGGTEEWSLGAPVAAV  
VLAVVFLMW

>Bradi1g31333

**MAPPKLSLLALLFLFP**AAGNAAAAAAAD**PADT**VAAA**APPA**LFNVTEILGRFPDFTLFNYLLTKTKVSAQI  
**NRRGTVTILAPVNADVDWLLRRSSRLPRAALVELLAVHVILDYIDA**AKLAALPRGRPGAPPVVATTLYQTM  
GVAPAGDRSGFLTITPTGNGGAVFASA**APGAPRFGP**PPRRIRSM**AVAPSPAPAPVLP**AVPPTMPVEEGT  
TETIPVAAEP**SDGNRAVEAMRLWFGAGVVMALACVL**TGL

>Bradi5g04846

**MASPVVTTTTALLLLTLASFSNS**AKFNITEI**ISESPEFKTFNSLLSKTKVAEEINARQDAITVLVDDKAAGAI**  
**TALPADTQKKVLAVHVILDYDPMKLD**SVHGKTAMLT**TFQTTGAAADSMGLIKYTQGADEQMSFASAE**  
PGSSASSQLVKVACRPYNLSVMQVSAAI**PPGIGKLSGSGNGSSSPTISGPETPPLGTEAIDADAP**DQM  
PDYASDQD**VDGPSSPAEPSP**TAKSDKGT**DSLAS**AGNKL**RQDIMGTSSVVGIMGALVMFVIW**

*Oryza sativa*

>LOC\_Os03g57490

**MGAPVCGALVCFVLLVARAAA**ETAPVERPTLPSADVAIDGNGNGARAGAGKAAGAGAVGGGIVSNSVL  
VALLD**SRYTEMAELVEKALLQ**ALED**AVA**EHNV**TILAPRNEALERDIDPEFKRFLLEPRNLNSLQSLLLFHVLP**  
**ARLPSGSWPAAATHPTLAGEDVELAAADGGGGMRVAHA**AVSRPD**AVVRTDGV**IGHID**RLLVPRSVQDEF**  
NRRRSLADISAMPPTAAPEVDPRTDRLKKPAPP**GDSPVLPISDATVPDPSVALASEPSDHYD**GD**SQVKDFI**  
QTLLKYGGYNELADIFVNLTSLATELAQLVSEGYALT**VLAPNDEAMARLTADQLSEPGSPENILYYHMIPEYQ**  
**TEESMYNAVRRFGKVRYD**TLRLPHKVVAREADGSVKFGHGEGSAYLFD**PDIFADGRISVQGIDAVLFP****PAE**  
**TKTKTKPATARIR**T**AP**AITGVSKIKHRRGKLLEAACQMVGILGQRSQFTRCQ

>LOC\_Os03g57460

**MGAPVRGALVFLLLLAGAAA**ETAPEEPTLPSAAADGAASSGTTSGAGAGTGINSNSVLVALLD**SHYTELAELV**  
**LVEKALLQ**TLED**AVGKHNVTIFAPRNEALERDLDPEFKRFLLEPRNLKSLQSLLLFHVLP**PARLPSGSWSAVS  
**HPTLSGEEVELAAAANDGAMRVAAVTRPD**AVLRPDGVIGHIERLLVPRSVQEDFNRRRSLADISAVLPT  
GAPEVDPRTHRLKKP**APPVPPGAPPVLP**WDAM**APGPSIAPAPAPGP**GS**GKH**HFDGHSQVKDFIQ**TLLLY**  
GGYNELADILVNLTSLATEMGR**LVSEGYVLT**VLAPNDEAMARLT**TDQLSEPGSPENILYYHMIPEYQTEESM**  
**YNAVRRFGKVRYD**TLRLPHKVVAREADGSVKFGHGEGSAYLFD**PD**IYTDGRIAVQ**GIDAVLFP****DDTKTAP**  
**DTAPVRRAP**AVTGT**RKKNLRRGKLLEATCQ**MAGILGQRLRFASCQ

>LOC\_Os07g06680

**MGVSALLLLLLAAAATA****APPEQPALSATP**SSAAAANNSSGGGGGAASNGVNSNSVLVALLD**SHYTELAELV**  
**EKALLQ**TLED**AVGKGNVTIFAPRNEALERDLDPEFRRFLLEPRNLRLSLQRLLLFHVLP**PARLHASDSSSPDFPS  
**SHPTLSGERVDLSASPMRVGAAAVTRPD**AVVRPDGVIGHIERLLVPRSVQEDFNRRRSLAAISAVLPTGAP  
EVDPRTHRLKKP**APPVPPGAPPVLP**WDAM**APGPSIAPAPAPGP**GS**GKH**HFDGHSQVKDFIQ**TLLLYGGY**  
NELADILVNLTSLATEMGR**LVSEGYVLT**VLAPNDEAMARLT**TDQLSEPGSPENILYYHMIPEYQTEESMYNA**  
**VRRFGKVRYD**TLRLPNKVTAREADGSVKFGHGEGSAYLFD**PD**IYTDGRIAVQ**GIDAVLFP****KDTATGGE**GS  
GSGSSGAAPARKAPAVTAH**SKSLRRGKLLEGACQ**VMGFLGRRSRFASCQ

>LOC\_Os08g38270

**MRHLRLAAALLLVFL**PLAVSAADGKAAA**APAKAKAPAAPPAP**PNITASMAKGCKAFAALVAASPDALS  
TFQSAADGGV**TAF**CPTDDAMRAFMPT**YKNLTADGKASLLLFH**AVPVY**SLRSLKSNN**GMNTLATDGSA  
**KNFNFTVQNEGD**KVTIKTDASDG**VARIKDTVYDKDPIAIY**AVDT**VL**EPVELFE**PAESPAPAPAVADAP**KAS  
KSKKASHRHVAD**APGPA**GDD**APPA**DQRKSSKKN**D**AAAGASCLRWLAALPVAVAVAAALA

>LOC\_Os06g17460

MALAGTLNASTVFFLLLLLLCVSVMSPPFTPASASPMGLTADAKVALLYHAVA AHFSEEALKAINGEVNTL  
ATDGGGGGKVLNLTIEEDDDGAGATVKLSSSSGNVARVTKTIQDADPHAVYLIDAVLMPLDVVVNVSSGG  
GAAAPSPAPVTSPAPAPAQATNPSPSPDSKPDNQPAAEQPENNSASRGGMAAWSLLSVVPAIASVLVR  
>LOC\_Os01g62380

MRGGAGALPVPGGALGVVLLLVAVLPSRAAGVNVTAALAAFPSFADFARLLESSPVAGELAARSSLTLLA  
VPNNNLPRSPSAFAAASGADIADVLRYHVLEYLSPSDLARLPASGKLVTTLFQTTGRAPSDLGAVNLTVGG  
NSTVVVRS PAPFPGSSATVLGAVTAVPYNLSVLAVGGLIVPSGLDVAASDSRPAGGVNITHVLADARGFNV  
AASMLEASGVADEFTADERGAGITVFVPTDDAFADLPATDRLOQLPADRKATVLRFHVLHSHYPLGSLESIV  
NPVQPTLATERFEAGQFTLNITRVNGSVAIDTGIVQASITRTVFDQNPVAVFAVSKVLLPKEMFGRGGADS  
DVMAPPPDAMAPDAAENVRTPPTRLSSPPALRGGADSESSALSTARAVNWWCIRLVLLNLHLLLPLV  
>LOC\_Os04g48490

MAATDRLLFLLAASLAVAVSSHNITDILDGYPEYSLNSYLSQTKVCDEINSRSTVTCLVLTNGAMSSLVS  
NLSLADIKNALRLTLDDYDTKKLHSLSDGSELTTLTYQTTGDASGNMGHVNITNLRGGKVGFAAAPGSK  
FQATYTKSVKQEPYNLSVLEVSDPITFPGLFDSPSAASTNLALLEKAGCKQFARLIVSSGVMKMYQAAMD  
KALTLFAPNDDAFQAKGLPDL SKLTS AELVTLLQYHALPQYAPKASLTIKGHIQTLASTGAGKYDLSVVTKG  
DDVSMDTGMDKSRVASTVLDDTPTVIHTVDSVLLPPELFGGAPSPAPAGPASDVPAASPAPEGSSPASP  
KAAGKKKKKKGKSPSHSPAPPADTPDMSPADAPAGEEAADKAEEKNGATAAATSVAATVASAAALLAASF  
L

>LOC\_Os08g39270

MMESKAAMMV TILLCCSSISPAFAQKHKGPPAAAAVSLPPSPAPSPAAPRHVDLADLLSVA GPFHFTLDLL  
EKTDVLRTFQSQANGSKDGITVFPKDAAFASLARSATANLTSDQLKSLALYHALPRYSLAEFNRLGGAAS  
PVPTLAGGEYTVNVTDDMGTVHVGSMWSNPKISSSVYSTRPVAVYEVDRVLLPMQIFRTDPPMAPSPAP  
APDAKPASDAASP LPGKSSSAKAKADEKSSSPSSRRGAGIAGYFLALAASASAGLLLLC

>LOC\_Os01g06580

MQAMQRLVLCVVSMAIAASAQGPTAAPAAPATPAAPATPAAPAPASTKTTNITGVLAKA GQFNTLIRL  
MRSTGAAEQIDNQLNSSRNGLTVFAPTDNAFTSLPSGTLNLSLSDQQKNSLVQYHVLSTLIPMSQFDTVSN  
PLRTQAGSNSPGQYPLNVTAEQQVNISTGVVNATVGNALYTGDNLVVYQVDKVLPMAIYS TPAPAPAP  
LSPATKKKGKTPATSVADAPEAADATPDATTPSLAAARVTAGAGVGVLALASVWLGL

>LOC\_Os09g30486

MEFKAAMFAAAVVAVLLSSPSPALAQKKSPPAAPSPVSLPPSLAPAPAPAPHYVDLAELLSVA GPFHFTFLNY  
LEKTNVIETFQSQANKTEGVTIFVPKDSAFAAIKQSTFSNLTDGDLKTL LLYHAFPKFYSLAEFNLSLNPV  
NTFAGAPYTLNLTDDMGTVSMWSRPKISSSVYATRPVAVYALNKVLLPMQIFSKDPPLAPAPAPAPVS  
GASDLAPGPASGKTGAGGGKADSTAACGVGAGVVNGLVMALAGSLMLLW

>LOC\_Os05g38500

MRGRQIPPTAAASSRVVVAAVAALLAAALQPLPVASGVDVAAVLAAFPDLAGFARLLASSPVARELAGR  
SSLTLLAVPNGNL PQSPSAYAAAAGADLADVLRYHVLEYLAPADLRRLPASGKLVTTLFQTTGRAPADLGA  
VNVTAAGPSLAVVRSPAPFPGSNATVLGAVTAVPYNLSVLAVDGLIVPSGFDLAASESRPPAAVNITKVLA  
ARAFNVAASMLEASGVADEFEADERGAGITVFAPTDDAFAGLPAGDRLQSLPAERKAVVLRFHVLHSHYPL  
GSLESIVNPVQPTLATEFTQAGRFTLNITRANGSVAIDTGVVQATITRTVFDQNPVAVFAVSKVLLPKEMFS  
RSDSAIVAVASAPPPAALPAESPESAPTKLSSPPALRD TAGNANHTAAAAAVA AATTKPTIGRWCIALLYL  
LLPLLLPLV

>LOC\_Os01g47780

MARSVAVVLLAMA AVAAQAAPGPAATPAAGATGPPNVTA VLEKGGQYTTFIRLMKETQQDTQLNSQL  
NNSFNGNGYTVFAPTDNAFNLLKPGTLNLSLTQQQVALVQGHVLPQFYSMDSFQTASN PVRTQASGTD

GPYTLNITSTNNNNVNVSTGVVEVTVTNALSAVKPLAVYSVDKVLLPFELFGVKAPAAAPTASTAKPKKGGSTEAASGPAGAEDAEPTEAASARAVGWGVAGLAAVVGCLL

>LOC\_Os04g39590

MRLAVATFLAIALSLSLLAGALARPAPVVRTDAGGGAAPAPQDKGGNLTDVLNVAGPFSTFLMYLRQTNLVAVFEHQAYRTHQGITIFVPVDMFAAAIEPSVLAGLSRNQLKHLMLYHSLAKHYTLAEFDGLSQSNPVKTLAGGRYAVNVTYDGGVVHVMSRWSSARVVGSVYESAAMAVYELDTVLLPDALFHAHPPVAAATPPVPALPSPPPHADHPPDDDDGDIDDYVPAPPPDPAAGKGGAKRSASGPAVVAHKAASYGAAAAMTLLVSCL

>LOC\_Os03g03600

MAAAQRLVAAVVVLVACLALPAARGLNITAMLNGYPDYKMFNKYLSETKVCDEINARESITLLVLGDGPMSTLVLDADQSLAGIKNALRLHAILDYFDPKKIRGLPADTMTDTLYQAGGDAAGKMGNVKISTLDTGKIFASANPGGKYEATMVKAIKQMPYKLSIMEISAPIEDGLFDTPSATNLTRLLEKAGCKRFASLITSTGVLTFTEDAMDKGLTLFAPNDDAFDAKGAPDVKKMPSADLVTLLKYHALPSYNPKPTLKTVSRAMRTLASTASGKYNITVDTRGDAVTLNTGVDKSRVAATVIDDTPVCVLTVDNLLMPVELFGDAPAAPSPDDAAPAPSPSVADASPPAPPPADAPSKPA DHKEMKASSAVALRSVVLGALAAVCSFVLL

>LOC\_Os09g07350

MAAARLVVVAVAVAVAVMAAAVEGKSYNITKILAAHPEFSKFNEMLSKTRLAYDINRRQTITVLAVDN SAMASLDHFTLPTIRHILSLHILVDYYGSKKLHALSHGATASSSMFQATGSAPGTTGYVNITSHKGGKIDFISEDADESAKPSRYVKSVEIPYDISVLQVSSVLSSEAEAPVPPAPVNLTELLSKKYCKSFAGLLAANADVFRAVNETKDNGTLFCPVDAAVAAMFMPYKNLTAKAKTAILLYHAVPDYFSLQLLKSNNGMVTTLATASESKKDYSYDVQNKGETVTLDRVNVNSAVTATVGDAEPLAVYAVTKFLKPKELYKVEAPAPAPEPSKKHKSAADDSSDDSSDDSGDVKAHGA AAPAPLARWVTAAAAAVALMLMA

>LOC\_Os05g07060

MHVAKKSLASMAASATTTILVAAMLVVMAVE SPVANGQAAAAAPAPAPAAPKTITAILTKAGQFTKFLQLLQSTQAGEQINNQIKGKASSSGGLTVFAPPDNFAALPTGTNLKLSDDQKTSVLQFHVVSALLPMAQFDTVSNPLRTQAGETAAGKYPLNVTAEGSRVNISTGVVNATVDNTLYSGDRLVVYQVDKVLLPWALYGPPVPAPAPSPADKAKKKAGPVGADAP AADTAAGTTTTTATASEAAARGTVRRGLGVAVAVAVAWCGM

>LOC\_Os08g23180

MELLRLRLAVVVAVVALTAATAAEGYNITKILGDHPEYSQFNKLLTETRLAGDINRRRTITVLVVANGDMGALSGGHYTLPTLRHILEMHILVDYYGAKKLHQLARGDTASSSMFQESGSAPGTTGYVNITQHRGGRVSFTAE DAADSATPSSFVKSVEIPYDLAVLQISKPLSPEAEAPVAPPAPVNLTELLSKKYCKNFAGLLASNADVSNINATKDNGTLFCPVDAAVDAFLPKYKNLTAKGKAAILLYHAVPDYSLQLLKSNSGKVSTLATASVAKKDYSYDVSNDRDSVLLDTKVNSASVTATVKDADPLAVYAIKFLQPKELFKVTEDLAPAPAPEGPKKKTKKKKPPSTTSAAAAPSDSSAADSPDGTPADDVADKAAAAPSVLARWVTAAATVAAALALAA

>LOC\_Os05g48890

MAMVARRFLVAAAVALCLAAVPAAMGQAAAPAPKGAAAAALNVTAILEKGSYTTFIRLMKSTQQDTQLNSQLNGTSTGFTVFAPTDGAFSSLKPGTLNLSAQDQVSLVQAHIVPKFYSMDAFDTASNVPVRTQASGGDGPYTLNITATSTNQVNVSTGVVDTTLGTALRADQPLAVYSVDKVLLPYALFGPKPPPSPPPAPSKKPAKG DTSASAEAPASADHPAGAAPAAARAAGWGVAALLAAACL

>LOC\_Os04g39600

MELKSAVLAVAALCLALALLPRVALSQR LATADAPAPAPAPRHVDLAELLSLAGPYGTFLGYLTKTGVIITFQSQANDTAAGAPGVTVFAPEDSAFAAVGGGAALSNLTADQLRTLMLCHGVPRYHPLSSFSALAASGPAPTFAGGQQYAVNVTDAAAGTVRIQSGWATAKLVSSTSPVAVYALNRVLLPEQIFPTAPKVAPVPAPAPAPVHGDKANDGAPGAGELGASDVKSSSCRVGAGRLLAILAVMVSSFSDDIVV

>LOC\_Os02g20560

MASSPSTVFLVLSLTATVSVVVVSGAGEAPSPAPTGPLNLTEILTKA GHYNTFVRLLKDEVTSTQVSSLLNN  
DRNGDGLTVLAPTDAAFGRLRPGTLNQMDAQQAELVLYHVLPRYYGFVTFETTTNPVRTQASGQRGVC  
TVNVTTAGEDRVRVSSGVVEAELGRPLRDGHPLAVYSLDAVLLP PDMFGPGAKKDYGAADAPAAAGKHG  
KPQTASSSSVAAAPDEAP SKEVDATATAAGRMAPAGWAAAFAGVVTAVVAVSLLSY

>LOC\_Os02g20540

MASHTTLILLPLLLAAAVAAADVAPAPAPPA AQTINLTGILEKG GQYNTLLRLLNATRVGEQLGSQKTTYD  
GLTFFAPTDAAFAALRPGTLNGLSDQEQVQLVLYHVLPRYYTLATFQTASN PLRTQATGPAGVYTVNVTTTT  
GQSLVNVSTGVAAPVPLGTTLSADFLAVYSVDGVLLPEQMFGKAKAPAPAAAP ASAAGKGANKEHKKGG  
AMPKNEVAATAPTAGAGGEDSDDSATTNAVAVAGAAGVVWTAALVGIANLVIA

>LOC\_Os09g30010

MRRLRLAAAAAPHGVLLLLLILLPLVAAAGPAAKAPAAPPAP PNVTTAMAKGGCKAFADLIAASPDASS  
TYQSAAGGGITVFCPTDDAVRAFLPRYKNLTADGKAELLFHAVPVYYSRGLSKSNNGVMNTLATDGAAG  
NYNFTVQNEGDAVTIKTAASGDAARVKSTVVDADPVAIFTVDAVIEPVELFKPAPSPTAPSPAPAADAPK  
ASKPAHH PAPVVADAPGPAATDSPPA DQKKEAKKSAAGAPPCVRWFAAALAAMASTLA

>LOC\_Os05g48900

MASSRLLLLAALLATAAVLAASQKPKAA TPTKATPASPGPAAAAADGPAPTNTVAVLEKSGKYTTFLRLHE  
SRVDTQINSQMLDSYNGLTMFAPTDAAFAALKPGTLNSLSSQDQIQLMLYCVLPRFYSLAMLTTLGGPVN  
TQASGADGPYKYKIKPSNNNVNISTGVNWALLSTVVS KD FPLAVYSVDKVPLPYELFGPKPPTPAPAPAPA  
PSKSKTKHKHSAGIAEPPVADDASADDTTKAAAPATAVSRWVVAAGVLAGAILAAL

>LOC\_Os06g44660

MASRLSLLLLALVLPASGDDAAAAEAAPPPAPAGGASFNVTEILGRFPEFGLFSYLISKTHVDRDINSRNTV  
TVLVPDNSAVDWLLRRSARLPRAALVELLSVHVVDYFDAAKIAALPPGKPTVSTTLFQTTGNARRRTGFLA  
ITPTAKGGAVFASAP GALVNATLKRVAAPVYNISVLQISNFV VPPGVLTRPRPGPGPLPLSPPLPRMKP  
MAIAPTAPVPAPT KMPVPIPPSLPLTDPADEDGDEAPAAAPAP SHGN AVKVMMSWWSGLVVGTMACV  
FGYL

>LOC\_Os02g26320

MACKNASSSAMPLLLVAGTVVLALLASPAAAFNITRILGEFSDFSTFNHLLTQTKLADEINRRQTITVLALDN  
GAAGGVSSLPDEQRKVLSVHVVDYDTEKLGGMKMKNRSAVLTTLFQSSGQATDRMGFLNYTKRSDG  
IMVFGSAEPGAQATSQMVKVVVTRPYNISVLQVNSPIVPPGIASVSNSNTGAPPPHPAKSSAPAPSPSKSK  
GKKSDAPAPGP SDDVDDDTAADAPGPAVDGPTADGPAADGPAADGPTAADAPAHDKGDVADAPSAAG  
RAVASSAGLVVALVLI FPSVSL

>LOC\_Os12g13160

MASFLAASLLIALVSGSNVAA TPSP SAVVGNGDIASTAQEMQRARYFTFVMLIRMVQE KIPHNNTFLMP  
NDRMLSTATIPESQVMEFLSRHSIPAPLMFDDLIKLPNATIVPTAHSSQTITITNVKHQKIYFNNIELISPDVC  
RVGDLFRCHGINGVIRP VPRGKGSACPGHLAPATAAPGPASGANRSLETSSLTSPNMSSATSPSLQPAAES  
PQSSDTSTS QIASSYTTLILVLVFSIF
