# Supplementary material for: Evolution Analysis of the Fasciclin-Like Arabinogalactan Proteins in Plants Shows Variable Fasciclin-AGP Domain Constitutions
Source: MDPI journal article supplement (doi:10.3390/ijms20081945), 2019-04-20
Supplement: s1 [file s1]

[illegible]

OsaFLA11.2 : --CKSFAGLAAANA---DVFRVNE---T---KDNGLTIFCFVDAVAAFM--PSYK-----NITAKAKTALLYHAFVDYF-SLQLLKSNN-----GM-VT-TLATASESKK---D--YSYDVQNK---G-----ET : 99  
OsaFLA9 : GQFTKFLQLQST---QAGEQINNQIKGKA-SSSGGLTVFAPDNFAAL-PTGT-----LNKLSDDQKQTSLVQFHVVSALL-PMAQFDTVSN-----P-LR-TQAGETA--A--GKYPLNVTAEGS-----R : 106  
OsaFLA3 : --CKNFAGLLASNA---DVYSNINA---T---KDNGLTIFCFVDAVDAFL--PKYK-----NITAKGKAAALLYHAFVDYF-SLQLLKSNS-----GK-VS-TLATASVAKK---D--YSYDVSND---R-----DS : 99  
OsaFLA18 : GSYTTFIRLMKST---QQDTQLNSQLNGT---STGFTVFAPTDGAFSSSL-KPGT-----LNSLSAQDQVSLVQAHLVPKFY-SMDAFDTASN-----P-VR-TQASGGD-----GPYTLNITATST-----NQ : 103  
OsaFLA13 : GPYGTFLGYLTKT---GVITTFQSQANDTA-AGAPGVTVFAPEDSAFAAV-GGGAA-----LSNLTADQLRTLMLCHGVPRYH-PLSSFSALA-----A-SGPAP---TFAGG--QQYAVNVTD-----A-----GT : 106  
OsaFLA15 : GHYNTFVRLKDT---EVTSQVSSLLNDR--NGDGLTVLAPTDAGFGR-LRPGT---LNQMDAQAAQAEVLVLYHVLPRYY-GFVTFTTTN-----P-VR-TQASQOR-----GVCTVNVTTAGE-----DR : 105  
OsaFLA19 : GQYNTLLRLLNAT---RVGEQLGSQLKT---TYDGLTFFAPTDAAFAAL-RPGT---LNLGSDQEQVQLVLYHVLPRYY-TLATFQTASN----- : 79  
OsaFLA10 : GGCKAFADLIAASP---DASSTYQS---A---AGGGITVFCEPTDDAVRAFL--PRYK---NLTADGKAEVLVLYHVLPRYY-SRGSLSKNN-----GV-MN-TLATDGAA-K---N--YNFTVQNE---G-----DA : 100  
OsaFLA6 : GKYTTFRLRLHES---RVDQTQNSQLMD---SYNGLTMFAPTDAAFAAL-KPGT---LNSLSSQDQIQMLLYCVLPRFY-SLAMLTTLGG-----P-VN-TQASGAD-----GPYKYKIKPSN-----NN : 102  
OsaFLA25 : PEFGLFSYLISK---HVDRDINSR---NTVTVLVDNSVDWLL--RRS---A-RLPRAALVBLVSVHVLVDYF-DAAKI----- : 68  
OsaFLA20 : SDFSTFNHLITQT---KLADENRR---QTITVLALDNGAGGVS---SLPSDEQRKVLVSVHVLVDY-DTEKLGGMKM----- : 69  
PabFLA22.2 : ---TVLAPNDEAMGKIT--TDQ---LSEPGAPEHIVYYHITPDYQ-TEESLYNAVR-----R-FG-KIKYDTLRV-----PHKLILSKEA--D-----GT : 71  
PabFLA9 : ---TVLAPNDEAMGELT--TDQ---LSEPGAPEQIVYYHVIPEYQ-TEESLYTAVR-----R-FG-KVKYDTLRI-----PHKMVTQEA--D-----GT : 71  
PabFLA17.2 : GGYNEMADILVNL---SLASELAKLVSE---GYKVTVLAPNDEAMGELT--TEQ---LSEPGAPEHIMYYHITPEYQ-TEESLYN----- : 74  
PabFLA15.2 : -NFNFVVSMMVAS---GITSLE---SDQ---AGAGITIFAPTDDAFSAL-PPDTLQ---GL---TAENKAVVLKYHVLHSYY-PLGSLDSIVN-----P-LQPTLATATESM-GA--GTYTLNITRVN---G-----S : 102  
PabFLA5 : KNFNFVVSMMVAS---GMTSELE---FDQ---AGAGITIFAPTDDSFSAL-PPHTLQ---GLTARNKA---LQGLTARNKAVVLKYHVLHSYY-PLGSLDSIVN-----P-VQPTLATATESM-GA--ETYTLNITRVN---G-----S : 113  
PabFLA20.2 : -NFNFLVSLMEAS---GVVSEFE---SEE---AGAGITIFAPSDDAFSAL-NPETLQ---GL---TAEKKAVILKYHVLHSYY-PLGSLQTIIVN-----P-AQPTLATQAM-GA--GSYTLNITRMD---G-----M : 102  
PabFLA21.2 : GGCKIFAGMISA-T---GVVKTFKD---A---VQGGTLVFAPTDASFTGVT-SKLLS---KLSSDEKSVILYHVLPMYS-PLGYLKTSN-----GP-IS-TMATGAG---K--YVMTASSS---G-----DT : 99  
PabFLA16.2 : AGCKIFVQMITA-T---GVLQTYSD---A---VASGLTILAPTDGAFSGTV-MLKLK---KLSSAQEVSILYHAFPAYN-PVGTLKTTI-----AP-IS-TLATNGAS---K--YALSVSAA---G-----DT : 99  
PabFLA10 : GPFKTFRLRLLEAS---DLLTVLQAQANN---TEQGITIFAPSDTAFSSSL-PKKL---LANLTADEIKEVILAHCHLCKFY-TLTDFQDFSN-----P-AN-TMATGSN---G--GKYNLINITGDGG-----T : 103  
PabFLA6 : GGCKIFAGLISTT---GVIKSYDDSIKSSQDAVKKGLTVFAPTDGAFSTDV-IKKL---LKKLSSDEKSVILKFAVPSYT-PLGTLKNTNG-----P-VT-TMASN-----YAVTVSSSGN-----T : 102  
PabFLA11 : ---LITA-T---GVLHTFQE---I---VDSGLTIFAPVDGAFDSVM-T-EIK---KLSRAQQVSVILYHARPVYS-PLGTLKTTD---GDVVT-TMATNGAE---R--YSLTVGVN---G-----DN : 91  
PabFLA18.2 : ---VRYHVPNRRLLADLRLP---A-GTR-LH-TLLHGQSL---LVTDN--- : 39  
PabFLA19.2 : ---GQDFVDNVTYHVPNRRLLADLMHLP---A-GTV-LH-TLLDGQSL---VVTNS--- : 47  
PabFLA12 : GQFKTFLSLTAGT---QAETQLQTQANN---TQQGLTIFAPLGAFFSSSL-RPQY---KAMLSKLTQ---APTLSN---P-LS-TM---GSYKFNVSAFG---AQ : 81  
PabFLA13 : ---AKL--DKIALIQYHATPSYY-TFGQFQTVSN-----P-VR-TMASGNG---GPFQVNVTAAGN-----S : 51  
PabFLA8 : ---KLSSDEKESLLEFHAPIYS-PRTTLKFSK---RP-IA-TMASTGPG---K--YDIKVSSA---G-----DT : 59  
PabFLA14 : GPFKTLNLLEAS---DLLTSIQSQANN---TEQE---RSVV-GP-L---HSQVLPDEKKEVILAHCHLCKFY-TLTDFQDFSN-----P-AN-TMATGSN---G--GKYNLINITAMSG-----A : 92  
PabFLA23 : ---SPALPHHVLCHVAAQR-LSYGDLVNKT---S-SDR-IP-SLALGHP---VVTGPL---T---NQGT : 67  
PpaFLA10.2 : ---TTLAPNDQMQLLT--TEQ---LNQA--MEPLLYYHITSEYQ-TEESMYNAVK---R-LG-KQSYSTLRH---PHKVASES---D-----GT : 69  
PpaFLA11.2 : ---TTLAPNDQMQLLT--IEQ---LDMP--MEPLLYYHITSEYQ-TDESMYNAVK---R-LG-KQSYSTLRH---PHKVIASES---D-----GT : 69  
PpaFLA1 : PSLSILADVIEAS---GLAEQLSM---TDNVTVLAPDNNAFNGTG--GLLSILAAN---NLTLEQ---VTAPGSNRAASILLYHIVESPA-TAADLTDGQT---LT-TALG---KA---YELTV-DK---TATPTV-VV : 109  
PpaFLA2 : PRLQQLAAVIEAA---GLADTVER---LVNVTVIAPDNNAFNGTN--GLLSLLRQN---NLNLTD---VTAPGQNRAASILLYHITAGPA-RAADLKNNQV---LT-TFLG---PN---YTLRV-NK---QTAPTL-IV : 109  
PpaFLA3 : PEYSTFKSLMEST---AVLSEVQTR---SSLTILCEPNSVLDPFI---AAR---R---SFSTQMLADVIRYHVLQYL-DSAEILRTQTNN---GGM-FT-TLYQTTGRANELDGF-VNITVTPS---NA : 104  
PpaFLA5 : PQFSMQKDALISS---GVADALKGM---NTLTLLINNGAFGGYL--GGH---S---TYTPQMVSVDLKYHILLSYF-DTETIKTVSTMN---DGV-VT-TLYQSTGRANGMDGF-VNITVSPT-----DG : 105  
PtFLA1.2 : ---TVLAPNDEAMAKLT--TDQ---LSEPGAPEQIYYHVIPEYQ-TEESMYNAVR-----R-FG-KISYDTLRL---PHKVLAEEA--D-----GS : 71  
PtFLA19.2 : ---TVLAPNDEAMAKLT--TDQ---LSEPGAPEQIYYHVIPEYQ-TEESMYNAVR-----R-FG-KISYDTLRL---PHKVLAQEA--D-----GS : 71  
PtFLA6.2 : ---TVLAPNDEAMAKLT--TDQ---LSEPGAPEQIYYHVIPEYQ-TEESMYNAVR-----R-FG-KIGYDTLRL---PHKVAQEA--D-----GS : 71  
PtFLA8.2 : ---TVLAPNDEAMAKLT--TDQ---LSEPGAPEQIYYHVIPEYQ-TEESMYNAVR-----R-FG-KIGYDTLRL---PHKVAQEA--D-----GS : 71  
PtFLA5.2 : ---TVCELDDEPKAFF--PKFK---NLTSAGKVSLEFFGVPIYQ-SLAMLSKNN---GI-MN-TLATDGEK---K--FDFTVQND---G-----ED : 71  
PtFLA22.2 : ---TVCELDDEPKAFL--PKFK---NLTSAGKESLLQFFGVVYQ-SLAMLSKNN---GI-MN-TLATNGDK---K--FDFTVQND---G-----ED : 71  
PtFLA42.2 : ---TIFAEVDQMDAY---AK---NVSDYSSIFRKHVVEGL-FPRQDLEGFN---D-GTS-LP-TFSGGFMI---NLTKSG----- : 62  
PtFLA37 : ---TIFCPEPDSLLFSVD--LAS---TAPHYTKSLFLHVSPSR-LSTSDLRNLTAASG-GTY-ID-SLVPNHRL---LITNSLA--Q---LNGT : 73  
PtFLA17 : AGCKTFASLLQTS---GVIKTYQ---SAADKGLTIFAPNDEAFKAA-GVPD---LSKLTNAEIVSLIQYHATATYS-PFGSLKTSKD---P-IS-TLASGA---GKFDLTVTSAGD-----S : 99  
PtFLA38.2 : HSFVLVAASLLSAS---GVVQEFE---ADE---GGAGITIFVPTDSAFSDL-SATA---IS---LQSLPADKKADVLKFFHVLHSYY-PLGSLDSIVN-----P-VQPTLATATEDM-GA--GSFTLNISRNV---G-----S : 105  
PtFLA30.2 : --FFVAASLLSAS---GVVEEFE---ADE---GGAGITIFVPTDSAFSDL-SETD---VS---LQSLPADKKADVLKFFHVLHSYY-PLGSLDSIVN-----P-VQPTLATATEDM-GA--GSFTLNISRAN---G-----S : 103  
PtFLA20 : GHFKTFIRLLKST---QLDSNLNSQLGN---TNNGLTIFAPSDSAFSAL-KTGT---LRTLTDQEKVELMQFHVIPPMFI-SSSQFDTVSS---P-LK-THA-GSG---ARFQLNVTASGN-----S : 101  
PtFLA23 : GQFSVFIRLLKAT---QEDVTLNGQLNN---TNNAITIFAPSDNAFSSSL-KSGT---LNSLNDQEKAEVLQFHLIPQYL-SSSQFQTVSN---P-LT-TQA-GSG---GRLELNVTTTGN-----S : 101  
PtFLA18 : GPFHNFLNYLEST---KVIDTFQNQANNT---DEGITIFVPEKDDAFKNL-KKAS---LSNLTQDQLKQLILFHAIAPHYY-SLSDFKNLS---Q-VSPVS---TFAGA--GGYALNFTDT---S-----GT : 102  
PtFLA10 : GQFSVFIRLLKAT---QEDVTLNGQLNN---TNNAITIFAPSDNAFSSSL-KSGT---LNSLSDQEKAEVLQFHLIPQFL-SSSQFQTVSN---P-LT-TQA-GSG---GRLELNVTTTGN-----S : 101  
PtFLA16.2 : -GCKAFSDLLIAS---GAHTTFEE---N---VDGGLTVFCEPTDPVINGFM--PKYK---NLTAPQKVSLLLYHGLPIYQ-SLQMLKTSN---GI-MN-TLATNGAN---K--YDFTVQND---G-----EV : 97  
PtFLA34 : GHFTVFVRLMQAT---TEDTELNKELNK---TNNGITIFAPSDSAFSLN-KAGF---LNLASDEDKTELVKFFHVLPAFI-SSSQFQTVSN---P-VR-TQA-GTG---PRVTLNVTTTGN-----F : 101  
PtFLA9 : GQFTTLIRLLKST---QEADQINTQLNN---S-NQGLTVFAPTDNSFANL-KAGT---LNSLSDQKQVQLVQFHLIPNFL-SMSNFQTVSN---P-LR-TQAGNSA--D--GEFPLNVTTSGN-----Q : 103  
PtFLA12 : GPFHTFLSYLEST---KVVDTFQNQANNT---DEGITIFVPEKDDAFKNL-KKPS---LNSLTQDQVKQLILFHAIAPHYY-ALADFKNLS---D-QQ-VSPVS---TFAGA--GGYALNFTDV---S-----GT : 102  
PtFLA7 : GQFTTLIRLLKST---QEADQINTQLNN---S-NQGLTVFAPPDNAFTNL-KAGT---LNSLSDQKQVQLVQFHLIPNFF-SMSSFQTVSN---P-LR-TQAGNSA--D--GEFPLNVTTSGN-----Q : 103  
PtFLA2 : GHFTVFARLMQAT---TEDTELNKELNK---TNNGITILAPTDNAFSSSL-KAGF---LNSLSDQKQVQLVQFHLIPNFF-SMSSFQTVSN---P-LR-TQAGNSA--D--GEFPLNVTTSGN-----Q : 103  
PtFLA13 : GHFTIFIRLLRST---QEENHLFSALND---SSTGLTIFAPTDNAFSSSL-KAGT---LNSLSDQKQVQLVQFHLIPNFF-SMSSFQTVSN---P-LR-TQAGNSA--D--GEFPLNVTTSGN-----Q : 103  
PtFLA47 : GHFTIFIRLLRST---QEENHLFSALND---SSSGVTIFAPTDNAFSEL-KSGT---LNTLSDGDKSELVKFFHVPTFL-STSQFQTVSN---P-LG-TWA-GTG---SRLPLNVTSYPN-----S : 101  
PtFLA40 : GHFTIFIRLLRST---QEENHLFSALND---SSSGVTIFAPTDNAFSEL-KSGT---LNTLSDGDKSELVKFFHVPTFL-STSQFQTVSN---P-LG-TWA-GTG---SRLPLNVTSYPN-----S : 101  
PtFLA28 : GHFTIFIRLLRST---QEENHLFSALND---SSSGVTIFAPTDNAFSEL-KSGT---LNTLSDGDKSELVKFFHVPTFL-STSQFQTVSN---P-LG-TWA-GTG---SRLPLNVTSYPN-----S : 101  
PtFLA39 : GHFTIFIRLLRST---QEENHLFSALND---SNTGITIFAPTDNAFSEL-KSGT---LNTLSDGDKSELVKFFHVPTFL-STSQFQTVSN---P-LG-TWA-GTG---SRLPLNVTSYPN-----S : 101  
PtFLA50 : GHFTIFIRLLRST---QEENHLFSALND---SSTGLTIFAPTDNAFSEL-KSGT---LNTLSDGDKSELVKFFHVPTFL-STSQFQTVSN---P-LG-TWA-GTG---SRLPLNVTSYPN-----S : 101  
PtFLA29 : GHFTIFIRLLRST---QEENHLFSALND---SSTGLTIFAPTDNAFSEL-KSGT---LNTLSDGDKSELVKFFHVPTFL-STSQFQTVSN---P-LG-TWA-GTG---SRLPLNVTSYPN-----S : 101  
PtFLA32/49 : GHFTIFIRLLRST---QEESHLSALND---SSTGLTIFAPTDNAFSEL-KSGT---LNTLRDGDKSELVKFFHVPTFL-STSQFQTVSN---P-LG-TWA-GTG---SRLPLNVTSYPN-----S : 101  
PtFLA45 : GHFTIFIRLLRST---QEENHLFSALND---SSTGLTIFAPTDNAFSEL-KSGT---LNTLSDGDKSELVKFFHVPTFL-STSQFQTVSN---P-LG-TWA-GTG---SRLPLNVTSYPN-----S : 101  
PtFLA35 : GHFTIFIRLLRSI---QEENHLFSALND---SSTGLTIFAPTDNAFSEL-KSGT---LNTLSDGDKSELVKFFHVPTFL-STSQFQTVSN---P-LG-TWA-GTG---SRLPLNVTSYPN-----S : 101  
PtFLA46 : GRFLSFVRLMKAT---HVDTLQFSQLNS---STDGITMFAPDNDAFSSSL-VAGA---VGSNDREKLEFVQFHLIPRFL-SISDFQTLN---P-VK-TLA-GSD---RKFPILTITSDN-----S : 101  
PtFLA3 : GQFATLIRLLNNT---QTLNQIENQLNS---SSEGMTIFAPTDNAFNLL-KAGA---LNLNQEQEQVQLLQYHILPKFY-TMSNLLLVSN---P-VP-TQASGQD---GVWGLNFTGQ---S-----NQ : 102  
PtFLA15 : GQFVTFISLLNKT---QTFNQIENQINS---SSEGMTIFAPTDNAFSLN-KSGA---LNLGSLQQQQVQLLQYHILPKFY-SLSNLLLVSN---P-VP-TQASGQE---GVWGLNFTGQ---S-----NQ : 102  
PtFLA14 : ---NHLFSALND---SSTGLTIFAPTDNAFSEL-KSGT---LNTLSDGDKSELVKFFHVPTFL-STSQFQTVSN---P-LG-TWA-RTG---SRLPLNVTSYPN-----S : 85  
PtFLA48 : GHFAFFTRLIKST---QEDIQLFSQLND---SRDGVTVFAPTDGAFSAIKSGV---LNSLTDHQKIELVQFHLIPRIL-TTANFQTVSN---P-T-TLA-GSG---NRFALNVITTEN-----M : 102

PtFLA27 : GGFVAVFIRLTKST----QEDIQVFSQLND---SRDGVTFIFAPTDGAFSAIKSGV-----LNSISDHQKIELVQFHITPRIL-TTANFQTVSN-----P-IT-TLA-GSG-----SRFALNVITTEN-----M : 102  
PtFLA43 : GHFTIFIRLLRST----QEENHLFSALND---SSPGLTIFAPTDSEFSEL-KSGT-----LNTLSDGDKSQLVKFFHVVPTEL-STSQFQTVVG-----YHLTSQSYTN-----S : 90  
PtFLA33 : GHFTIFIRLLRST----QDENRLFSALND---SSTGLTIFAPTDSEFSEL-KSGT-----LNTLSDGDKSELVKFFHVVPNSY-LLPSSR-----YHLTSQSYTN-----S : 75  
PtFLA21 : PDFSTFSSYLTTQT----QLAGEINSR-----QTITVLVVENGNMSPLS-----GKPNGEIKNVISGHVILDDY-DVAKLQKLQNK---TAM-IT-TL----- : 77  
PtFLA26 : PEFANFNDLISQS----GLAQEMNSR-----QTITVLVLDNGSIDGLS-----GRPLDIAKRILSAHVILDDY-DQIKLSKLQKA---STI----- : 73  
PtFLA4.2 : -----TIFAEPELEFVAS-----SSPMLEKIVRLHITPQR-ATYIELAALP---D-KQR-IR-TLLPDEDL-----KITKG-----VG : 61  
PtFLA44.2 : -----VRFHIVPNHYLSTADLERLP---V-GAT-LP-TLGERQAL-----VVTSAGG--L---TGFN : 46  
SmoFLA3 : GGYNEMAELLVNLT---SFAWDMAKLVNE-----GHRLTILAPNDHMDHLT--TEQ-----LNPAGGLEAIIIMYHVLTEYQ-TEESLYNAVR-----R-FE-KVKFLLTLWQ-----PHTIHAKET--D-----GT : 101  
SmoFLA6.2 : GNFNFTFLGLLAST---GVDKALR-----SMSAVTILAPDDDAFKAL-PPNA-----LAELISQAQKIALIQFHATATYF-TMGSLRSVAT-----P-LP-TVASSRI-----GGFELNVSTAGG-----KG : 98  
SmoFLA7.2 : GKFTTFLNLMQS-T---GFTAALA-----TLPAFSLFVPTDEAFQGLP-NGTMA-----LMAYHTLPAYT-SSGSLQRQN-----SL-VQ-TVASNGDNQ---K--FLIQVAPSGGNS-----GG : 101  
SmoFLA8.2 : --YKTFQKLMQDT---GTLAAEDIEHQF--FTSGVTVFAPTDSEAFQNL-PSGSL-----AALTQSQRQILVRYHLLPSFF-TFGSLRTLKA---P-LT-TLATS---N--RNFEVNASGEGP--S---GG : 102  
SmoFLA9.2 : -----LVNE-----GHALTILAPGDRVARIA--AE-----HLGAIESIIAYHIVAEYQ-TEESLYTL----- : 50  
SmoFLA4 : PNFKRFNTLITTS---GVVDQVNPM-----LTATLTFIPENNTLLNDF--IYDM-----G---K-HPSEEKLADLVRYHISDFYI-ESEFLAVRRNF---SSP-IK-TLFRERPYEETLHFRWLQINVDNH-----GV : 107  
SmoFLA5 : PDYTNLNMILLQT---GVANEINQR-----SSLTILAAEDSVLDPII--DQL-----A---Q-SVTFGQIADIIIRYHVLLEYE-GINDLRSLPNK---SKL-FT-TLFTQTTGRASNAGF-VNITDDPN-----GG : 105  
BdiFLA23.2 : -----TVLAPNDEMARLT--TDQ-----LSEPGSPENIIYYHMPPEYQ-TEESMYNAVR-----R-FG-KVRYDTLRL-----PHKVVAREA--D-----GS : 71  
BdiFLA22.2 : -----TVLAPNDEMARLT--TDQ-----LSEPGSPENIIYYHMPPEYQ-TEESMYNAVR-----R-FG-TVRYDTLRL-----PQKVTAREA--D-----GS : 71  
BdiFLA9 : -----TLFCFVDAAVASFM--PKYK-----NLTAKAKTATILLYHVPDYY-SLQLLTSNS-----GK-VS-TLATSSVAKK---D--YSFDVSKD---G---ET : 73  
BdiFLA1 : -----TTLAPTDADFEDL-PSGT-----MNGLSQDQCMMLYCVLPREFY-GINDLRSLPNK---SKL-FT-TLFTQTTGRASNAGF-VNITDDPN-----GG : 72  
BdiFLA20.2 : -GFNVAASMLEAS---GVADDFE--ADE--RGAGITVFVPTDDAFAG-GLPDA---AGR-----LQSLPADRKAVVLRFFHVLSHY-PLGSLESIVN-----P-VQPTLATECT-EA--GRFTLNITRSN---G---S- : 106  
BdiFLA10 : -GFNVAASMLEAS---GVAEEFE--DDE--RGAGITVFVPTDDAFASL-PAG-P-----GDR-----LQSLPAERKAVVIRYHVLHSY-PLGSLESIVN-----P-LQPTLATEFSSQA--GRFTLNITRAN---G---S- : 106  
BdiFLA11 : -GPFHTFLSYLQKT---NVIETFQRQANKT--KEGITIIFVFKDSAFAL-KKST-----FSNLTSDQLKMLIMYHAPPEFY-SLAQFRNLS-----V-LNPVN---TFAGA--PYTLNLTD--M---GT : 101  
BdiFLA3 : AGCKAFADLTVS-S---GVIKTYQA---A---MDKGLTILFAPNDDAFQAKG-LPDLS-----NLTSANLVPQYAPVYY-TRRALKSN--GG-IP-TLASTGSG---K--YDLSVVTK--G---DD : 99  
BdiFLA12 : GPFHTFLDYLEKT---DVLKTFQSKANDTK-ESAEGITIIFVFKDSAFSSL-RATT-----FANLTGEEKLSLVLYHAPKYY-SLAEFNKLS-----S-LNPVP---TFAGS---QYTLNLTDN---M---GS : 104  
BdiFLA8 : GQYTTFIRLMKET---QQDTQLNSQLNNSF-N-GNGYTVFAPTDNDFNNL-KPGT-----LNSLTQQQQVALVQGHVLPQFY-SMESFQTASN-----P-VR-TQASQGD---GPFTLNITATAN-----NQ : 105  
BdiFLA13 : GQYTKFMRLMKST---QQDTQLNSQLNGS---DTGFTVFAPTDNDFDSL-KAGT-----LNSLSQQEQVSLVQAHIVPAFF-SMESFETASN-----P-VR-TQASGAD---GPYTVNVTATSN-----GQ : 103  
BdiFLA4 : GRQTFVMYLLQQT---GLVEVFIEIQAHRT---HHGITIILVPTDRFAAI-EPSV-----LSGLKFWDKLSLIMYHAPVYY-TRRALKSN--GG-IP-TLASTGSG---K--YDLSVVTK--G---DD : 101  
BdiFLA14 : GQFTKFLQLQST---QEDSQIDNQLKGKS---SSGGLTVFAPPDNAFSAL-KSGT-----LNAISDAQKTSLVQFHVVSQLI-PMAQFDTASN-----P-IR-TQAGETR--P--GKYPLNVTADGQ-----Q : 105  
BdiFLA15 : GQFNFTFIRLLRST---GVAAQIDNQLNS---SQTGGLTVFAPTDNDFDSL-ASGT-----LNSLSDSQKNSLVQFHVILSTAV-PMSQFDTVSN-----P-IR-TQAGSSS--P--GEYPLNVTATGQ-----Q : 104  
BdiFLA16 : GPYGTFLDYLTKT---DVIKTFQSQANDTEEQGGHGITVFAPQDSAFAAV-DSAL--SNLTADRLRSLMLHAAAPKYY-PLSVFSALA-----ASS---TPVSM--FAYSVNVTDK---A---GK : 103  
BdiFLA17 : GGCKAFADLTVSASP---DASSTFQS---A---IDGGVTAFCEPSDGAVFASFL--PRYK-----NLTAAGKAAILLSEAVPVYY-TRRALKSN--GG-IP-TLASTGSG---K--YDLSVVTK--G---DD : 100  
BdiFLA21.1 : PEFVSYSGLIRET---GLASILDR---RVVTVLAPNNTDIPKVI--H---TTPRPLLADLLALHVPDYLDPEKLDALRRG---RTG-DG-S----- : 77  
BdiFLA21.2 : PDLTAFNSLLTDS---GLARAINAR---PTVTVLATNNTLADSL--RGL-----R-HLPEPALVDLLALHVLDDYL-DPEKLDALRRG---RTG-GG-SIVT----- : 83  
BdiFLA5 : AGCKRFAALVAGNP---GVLKAYQA---A---MATGLTILFAPNDDAFVAKAGTPDVG---KMEKDDLVRLLMYHAPPAYE-PKPSLKLKVA---GARP-IR-TLASTAAG---E--YNVTVVAR---G---DD : 104  
BdiFLA18 : GQYTFVADLTVSASP---DASSTFQS---A---ADGGVTAFCEPSDGAVFASFL--PRYK-----NLTAAGKAAILLSEAVPVYY-TRRALKSN--GG-IP-TLASTGSG---K--YDLSVVTK--G---DD : 100  
BdiFLA6 : ANFTDFSSALASA---NLTAQIDGR---TPITILAVDNAVAQLK--A---R-RLAPESLAHVLSLHVLDDYF-DDARIRHL----- : 69  
BdiFLA19 : PDFTLFNYLLTKT---KVSQINRR---GTVTVLAPVNDVDWLL--RRS-----S-RLPRAALVELLAVHVLDDYI-DAAKL----- : 68  
BdiFLA7 : PEFKTFNSLLSKT---KVAEEINAR---QDAITVLVVDKLAGAIT--ALPADTQKKVLAVHVLDDY----- : 60  
MpoFLA6.2 : GGYSIFFVSLTQ-T---GVDVVFGR--Q---SGEGITIIFVPTDEAFNKLP-GQWFE---AFELGKQLILLEYHATRYN-SLDALWRYR---DKQV-P-TVSSSTVQEGP--DA--FNLLVTAN---K---GL : 104  
MpoFLA1 : GQLSSLKMOVVDA---GLADTFDDDS---ALNVTVFAPNNAIQGLV---NVLNAS---GLTLAN---VTGN--NNKAASIVLYHVA TLVA-TSTQLVNDQS-----LP-TLYG--GYN-----LTVDR-N---A--TN-VE : 103  
MpoFLA14.2 : GGYSEFAGLLVDLT---SLGSISKLVMN---GYKLTILAPDDKWSGAL--TEEH-----LSSQTALEDIIHYHITTEYQ-TEESLYSTLR---R-MG-KTHFTLRV---PHKLAAHEV--D-----GQ : 102  
MpoFLA7.1 : PRFSVLSDLLVSS---GVEKEINSR---TSITILAPADAVLTAFQ--ASV-----P---NADTVKIIDLLRYHVLQYF-DMTCLKGLGTVN---YSS-VT-TLLQTTGRANEQDGF-VNIYNTAT---QI : 105  
MpoFLA7.2 : --FSLFISYLKAT---GVDGVLA---TRQ---TSGGLTVFAPNDDAFVAKAGTPDVG---KMEKDDLVRLLMYHAPPAYE-PKPSLKLKVA---GARP-IR-TLASTAAG---E--YNVTVVAR---G---DD : 104  
MpoFLA2 : PDLSSLGQVVQAA---GLTETLSDP---TLEVTVFAPNNAFEEELL---QVLNSS---GLTLDD---VTAPESNKAASIIILYHVPVAA-LSTQLSDMQV-----LP-TLL---GKN---LTVSL-M---G--GM-VN : 103  
MpoFLA3 : PDLSSLGQVVQAA---GLTETLSDP---TLEVTVFAPNNAFEEELL---QVLNSS---GLTLDD---VTAPESNKAASIIILYHVPVAA-LSTQLSDMQV-----LP-TLL---GKN---LTVSL-M---G--GM-VN : 103  
MpoFLA8.2 : -EFTLLISYLQET---KVDVFA---EKQ---AEGITIIFAPRDSAFNSL-ATGSI---QTLSELSEQKILLEYHAPDGYE-SLDSLETMLN---K-PTKTLASAD---A--AGYILNVSATPG---Q---ST : 101  
MpoFLA9/10 : KDYTMFISLLKDS---GVDSIFA---GRQ---TGGGITVFAPTDSEFNGL-TSASL---QALSVTDKLIMQYHATSYQ-PLSVLQNMVN---S-PVSTIASTI---A--SGYLLNVSSA---V---MT : 101  
MpoFLA11.2 : --YTMFISLLKES---AVDSIFA---GRQ---TGGGITVFAPTDSEFNGL-TSASL---QALSVTDKLIMQYHATSYQ-PLSVLQNMVN---S-PVSTIASTI---A--SGYLLNVSSA---V---MT : 101  
MpoFLA12.2 : --YTMFISLLKES---AVDSIFA---GRQ---TGGGITVFAPTDSEFNGL-TSASL---QALSVTDKLIMQYHATSYQ-PLSVLQNMVN---S-PVSTIASTI---A--SGYLLNVSSA---V---MT : 101  
MpoFLA13.2 : -NYNTFIQLIQST---GIDAEFA---AKQ---TGTGITIFAPTDAAFAAL-PAGAL---AALTPOQAKVLRRAHIVTYY-PLGTLSTM----- : 74  
CcrFLA1.1 : DQFSIFVLAALAVP---DLTEALGDP---NRRLTVFAPTNAAFAALT--NKLSPGAGVDAADPEGILFALMGALPGP-L---PGRSPGEVLTTISYHLLAFAA-PFQELNDGT--A-----E-TVQGTLLR-----FRDGRVV--D----- : 120  
CcrFLA1.2 : DSFGILARAVGTVD---SLVKALDDP---NSRFTVFAPTDSEAFALA--NQLVPGADLNPADKDAVVEALVSAIAPLAD---VEAAAANSTIESILGYHAPFAA-PFQELNDGT--A-----E-TVQGDALR-----FADGLVI--D----- : 121  
CcrFLA1.3 : -----LVEVLGNP---GSRLTVFAPTDSEAFNLA--NTLVPDANLEASDKDAVVEALVTAIAPLAD---VEAAGGATIESIIILYHAPGMAA-PLGKLEEMKT--A-----K-TLQGGVLS-----FNSGSVT--D----- : 106  
CcrFLA1.4 : -----VEVLGNP---GSRLTVFAPTDSEAFNLA--NTLVPDANLEASDKDAVVEALVTAIAPLAD---VEAAGGATIESIIILYHAPGMAA-PLGKLEEMKT--A-----K-TLQGGVLS-----FNSGSVT--D----- : 105  
CbrFLA1 : PRFSIFVGLLDKG---FAANLPL-----QPLTISVPEENAFARLG--PGQL---D---TIKADEALLYEILGYHAFADGEY-PKADLLAAIAK---STS-GT-VSVPT-----QGGSYVSFSSVG-----DV : 99  
CbrFLA2 : -QFSMFYKALVDT---TEIWNVEGRTVL---VGEQLILFAPTNAAFAAL--SE---EV---ITCLQK---EP-QQA-TLASELKY----- : 66  
CbrFLA3 : PEFQRFYEALNMS---RSIDMVKGL--V---N-SGVTLFAPVNGAFDALG--AV---Y---TECMLK---RP-GMDDLPLIVRFHVAT-GNFVNAQLMTMSS-----VQ-SFLG---LP-----IPLTH-AA--AG-----GL : 100  
CbrFLA4 : TAYANFVEAALTTR---GATVSILLD---DSNVTVFAPINSADFCLG--SSL---VDCLLSDS---SSGLLDIIILNHFEGG-HPSKSLTD-G---QK-LL-TVANTTAE-----IAV--N---E---TG : 97  
CbrFLA7 : GDLSMFSNALMAS---RINLTLSGI--V---GGGRVTVFAPNNGAFAMLS--PE---V---KQCLDT---QS-GKIDVLTQIMLFHILAVGGNYTAAELKTISR-----LT-AASG--MP-----IDLMT-LG--DG---TI : 102  
CbrFLA9 : GDLSMFSNALMAS---RINLTLSGI--V---GGGRVTVFAPNNGAFAMLS--PE---V---KQCLDT---QS-GKIDVLTQIMLFHILAVGGNYTAAELKTISR-----LT-AASG--MP-----IDLMT-LG--DG---TI : 102  
CbrFLA11 : -GLTTFVSLKLA---KVDESLKGI--A---ATGPVTVFAPSEAFVLS--SAYP--AQ---LACVTT---GQ-GIDNYLSQILKYHILPNGNFTASKLTKLTQ---VS-TLIG---LP-----IQLEYTLP--SG-----PL : 105  
CbrFLA15 : KNLTLYVGALRSSRGALMAMEAQRRR---PGGVTVFAPTDAAVSDQI--QRL---GGCLAA--IPVDADLVMTSSLLYSAPVPHGL-PMATEIRSRLNQSNGLR--LP-TLYP--PNE-----VAVSS-AT--SRYPSTKMG : 117  
CbrFLA16.1 : -QYSTLVSLIT--K---ANLTVSLDT---TSPLTVFAPTDNDVIEALN--VGD---TKFLTDPK---NVELLKRILVYHVFVNSK-ILAVNLTA-G---RS-LR-SLEGENLI-----VEV--E---D-----GT : 94  
CbrFLA16.2 : -----TLFAPSNGQMSSSV--E-M---AQLLTNA---TARNLILYHILAGR-YTFSWLKEHP---GV-YD-NFTGFEI---VV-SGG--G-----TE : 67  
CbrFLA16.3 : -----TLFAPSNEAITNFM--LAY---AALLSDN---AKLDEVLKFFHVINGS-YSAFLRLTNP---GD-YG-G---NF-----SVVVQ--G-----DS : 64  
CbrFLA16.4 : ---SNYTQIAFLVR---RVGPITYLGE---LTNNTLFAPSNEAITNFM--VAN---AALLGDR---AKLDEVLKFFHVINGS-YTASFLRKNP---GD-YG-G---NF-----SVDVQW--D-----NS : 89  
CbrFLA19 : PDLTMFVQALLVS---DTFHVAISR--A---NGGVTILAPNNAFVSFD--PA---V---LDCLYS---KP-ASLNVLSQITKYHILV-GNHATELILAMQT---VH-ADSG---LP-----LHFNLT-S--RG---RV : 101  
CbrFLA20.1 : -----DYVNT---LRNVTFAPVNSWDFLD--PAM---KDCLMAGD---KLVDVVVKSHTLIGK-LTAEMISNVP---R--VE-NLYRFLW-----NVTDD--I-----TN : 78  
CbrFLA22 : --LKKFYIALQIS---RIELRLRDS--A---NRGPITVFAPTDSDSITKLD--PE---L---WTCVTT---GQ-GPLDILSQITLYHIVTDGNFTAAEVATKRH-----LT-SASG--MP-----LGVKV-V---NG---NV : 99  
CbrFLA23 : ---KKFYIALQIS---RVESRLRDS--V---NQGPITVFAPTDSDSFMKLD--PE---L---WRCATT---GQ-GPLDVLSQIMLYHIVTSGNFTAAEVATKTQ-----LT-SASG--MP-----IDVKD-V---NG---NV : 98  
CbrFLA24 : --LKKFYIALQIS---RVESRLRDS--V---N-QGPIVFAPTDSDSFMKLD--PE---L---WRCATT---GQ-GPLDVLSQIMLYHIVTSGNFTAAEVATKTQ-----LT-SASG--MP-----IDVKD-V---NG---NV : 98

p a

h

```

      *      180      *      200      *      220
AtrFLA10.2 : VKFGHG---EGSAYIDPDIYM-DG-----RISVQGIDKVLFP : 105
AtrFLA11.2 : VTLETKA---VTAKTGTI-ID-ED-----PLAVFSIDKVLQFP : 104
AtrFLA5 : --GS---LRINYVPKGPDAVY-NS-----RIVVHSIF----- : 90
AtrFLA2 : VAVSSGI--VI--APVTQTV-FD-QK-----PLAIFTVPKVLFP : 135
AtrFLA7 : VSLDSGW--SQ--TLSSSV-YS-TR-----PVALYQVDSVLLP : 134
AtrFLA3 : VNVTTGL--VT--TPANSI-NV-TS-----PLAVYEDKVLFP : 138
AtrFLA8 : VNVSTGI--ND--APVANTV-YT-DG-----QLAVYQVDKVLLP : 135
AtrFLA9 : VTLDTGV---DKSRVASTV-LD-DA-----PLCILTVDNVLLP : 131
AtrFLA4 : VAIDTGL--VQ--ASTRTV-FD-QN-----PVAVFGVSHVLLP : 128
AtrFLA6 : ----- : -
AtrFLA12 : --DS---LRINYVPKGPDAVL-NW-----RIVVHSIF----- : 89
FLA16.2 : VKFGHG---DGSAYFDPDIYT-DG-----RISVQGIDGVLFP : 105
FLA17.2 : VKFGDG---EKSAYFDPDIYT-DG-----RISVQGIDGVLFP : 105
FLA15.2 : VKFGHG---DGSAYFDPDIYT-DG-----RISVQGIDGVLFP : 105
FLA18.2 : VKFGSG---DRSAYFDPDIYT-DG-----RISVQGIDGVLFP : 105
FLA1.2 : VTLEKTRI---NTVKVDTL-ID-EQ-----PLATYATDKVLLP : 104
FLA20.2 : --DI---LLLNGVPIYPDLV-ND-----WIAVHGFNQMI-- : 93
FLA21.2 : SGGD---FMISGVEVDPDMFS-SS-----NFVTHGVSHTLEI : 81
FLA19 : SNDS---IFLDGVQLIPGLFD-GQ-----HTAVHGLADLLPL : 99
FLA4.2 : VTINSGV--VL--AVVTQTA-FD-QN-----PVSVFGVSKVLLP : 138
FLA10 : VILHTGV---GPSRVADTV-VD-ET-----PVVIFTVDNVLLP : 132
FLA8 : VILHTGV---APSRVADTV-LD-AT-----PVVIFTVDNVLLP : 132
FLA11 : VNITTVGV--VS--ATVANSV-YS-DK-----QLAVYQVDQVLLP : 137
FLA12 : VNITSGV--TN--TTVSGNV-YS-DG-----QLAVYQVDKVLLP : 136
FLA7 : VRIDSLW--TR--TKVSSSV-FS-TD-----PVAVYQVNRVLLP : 134
FLA9 : INVSTGY--VE--TRVSNL-RQ-QR-----PLAVYVVDVLLP : 136
FLA6 : VNVSTGV--VE--TRVNNAL-RQ-QF-----PLAVYVVDVLLP : 138
FLA13 : VNVSTGV--VE--TRVSTSL-RQ-ER-----PLAVYVVDVLLP : 137
FLA14 : ----- : -
FLA3 : IYFG----- : 103
FLA5 : VYFG----- : 103
FLA2.2 : VTLETDV---VTAKVMGTL-KD-QE-----PLIVYKIDKVLFP : 104
CreFLA11.1 : MILA-A---QSKAKVTAD-LK-AG-----MTIVHIVDTVLVP : 107
CreFLA11.4 : VFLT-A---TNTVKVIAAD-IA-AG-----KSIVHKLDGVIV- : 129
CreFLA1 : AVAGNP---NSSAEVIKAD-IP-FN-----AAIVHVINKVLLP : 131
CreFLA10.2 : AF---VVSTSTTANVVAQD-IP-AG-----AGYVNVVDRVI-- : 145
CreFLA9.2 : ----- : -
CreFLA8.1 : MTIT---GPQNSAKVKANQLLANG-----KVVAHLVDKVLFP : 131
EgrFLA9.2 : VKFGQG---EGSAYFDPDIYT-DG-----RISVQGIDGVLFP : 105
EgrFLA5.2 : VKFGQG---DGSAYFDPDIYT-DG-----RISVQGIDGVLFP : 105
EgrFLA10.2 : VTLETKV---NTAKTGTL-LD-EQ-----PLVIYTLDKVLLP : 104
EgrFLA11.2 : VTLEKTRV---NKVKVGTL-LD-EQ-----PLATYSIDKVLMP : 104
EgrFLA16.2 : --DR---LMLNGVPTSPDIYT-SD-----WLSIHGVLDDVI-- : 100
EgrFLA14.2 : --DG---LLLNGVPTSPDIYT-SD-----WLSVHGVLDDVI-- : 105
EgrFLA4 : VAIDTGI--VQ--ATVTQTV-FD-EN-----PVAIFGVSRVLLP : 137
EgrFLA12.2 : VKLETKV---VTATVGTV-ID-QD-----PLIVYKIDKVLQFP : 130
EgrFLA8 : VHVNSGW--TN--TKVSSSV-LS-TD-----PVAVYQVDHVLLP : 134
EgrFLA7 : VRLSSGW--TN--TKVSSSV-HS-TD-----PVAVYQIDKVLFP : 134
EgrFLA13 : ----- : -
EgrFLA6 : VNVSTGM--VE--TPVNNAL-YQ-QS-----PLAVYQVDKVLLP : 131
EgrFLA1b : VNISTGV--TN--ATVDQTV-YN-DG-----QLAVYMDKVLFP : 136
EgrFLA3b : VNVTTGV--VA--ASVDNAI-TS-NS-----KLATYQVDQVLLP : 122
EgrFLA2b : V----- : 104
EgrFLA17.2 : QRTR---VAINGLEVGVPDIY----- : 86
EgrFLA20.2 : --AT---MRINYVRVKSPDVMR-NQ-----KVVVH----- : 69
OsaFLA17.2 : VKFGHG---EGSAYFDPDIFA-DG-----RISVQGIDAVLFP : 104
OsaFLA24.2 : VKFGHG---EGSAYFDPDIYT-DG-----RIAVQGIDAVLFP : 105
OsaFLA16.2 : VKFGHG---EGSAYFDPDIYT-DG-----RISVQGIDAVLFP : 105
OsaFLA4 : VTIKTDA--SDGVARKDTV-YD-KD-----PIATYAVDTVLEP : 107
OsaFLA23 : ATVKLS-SSSGNVARVTKTI-QD-AD-----PHAVYLDVLLMP : 93
OsaFLA12.2 : VAIDTGI--VQ--ASTRTV-FD-QN-----PVAVFVSKVLLP : 136
OsaFLA1 : VSMDTGM---DKSRVASTV-LD-DT-----PTVHTVDSVLLP : 132
OsaFLA5 : VHVGSMM--SN--PKVSSSV-YS-TR-----PVAVYEDRVLLP : 135
OsaFLA8 : VNISTGV--VN--ATVGNAL-YT-GD-----NLVVYQVDKVLLP : 136
OsaFLA27 : ISVQSMW--SR--PKVSSSV-YA-TR-----PVAVYALNKVLLP : 134
OsaFLA26 : VAIDTGV--VQ--ATVTRTV-FD-QN-----PVAVFVSKVLLP : 135
OsaFLA7 : VNVSTGV--VE--VTVTNAL-SA-VK-----PLAVYSVDKVLFP : 138
OsaFLA14 : VHVMSRW--SS--ARVGVSV-YE-SA-----AMAVYELDTVLLP : 134
OsaFLA2 : VTLENTGV---DKSRVAAATV-ID-DT-----PVCVLTVDNLLMP : 132

```

```

OsaFLA11.2 : VTIDTRV---VNSAVTATV-GD-AE-----PLAVYATKFLKP : 132
OsaFLA9 : VNISTGV--VN--ATV DNTL-YS-GD-----RLVVYQVDKVLPL : 139
OsaFLA3 : VLLDTKV---NSASVTATV-KD-AD-----PLAVYATSKFLQP : 132
OsaFLA18 : VNVSTGV--VD--TTGTAL-RA-DQ-----PLAVYSVDKVLPL : 136
OsaFLA13 : VRIQSGW--AT--AKVSSV-YS-TS-----PVAVYALNRVLPL : 139
OsaFLA15 : VRVSSGV--VEAEL--GRPL-RD-GH-----PLAVYSLDAVLPL : 138
OsaFLA19 : ----- : -
OsaFLA10 : VTIKTAA--SGDAARV KSTV-VD-AD-----PVAIFTVDAVIEP : 135
OsaFLA6 : VNI STGV--N--WALVSTVV-SK-DF-----PLAVYSVDKVPLP : 135
OsaFLA25 : ----- : -
OsaFLA20 : ----- : -
PabFLA22.2 : VVFGEG---EEAAHFDHDIYI-DG-----RISVQGI D K VIFP : 105
PabFLA9 : VMFGHG---ETTAHFDHDIYV-DGRISVQGI D K VIFP : 119
PabFLA17.2 : ----- : -
PabFLA15.2 : VAVDTGI--VQ--ASVTQTV-FD-QK-----PLAVFAVPRVLPL : 135
PabFLA5 : VAVDTGI--VQ--ASVTQTV-FD-QK-----PLAVFAVPRVLPL : 146
PabFLA20.2 : VAVNTGI--VQ--A----- : 112
PabFLA21.2 : VMLNTRI---SKATVSDTL-LD-DQ-----PLAIFTVDKLLKP : 132
PabFLA16.2 : VILNTGL---SKSTV SSTI-LD-DQ-----PVVLYTSGVLPL : 132
PabFLA10 : VTVSSGY--VT--TPVISTV-HV-TD-----PLAITYTGKVLPL : 136
PabFLA6 : VTLNTSL--SK--ATV SSTL-LD-NL-----PLAIFTVDKVLPL : 135
PabFLA11 : VILGTGV---NSAVTSTL-LD-DQ-----PLVVFSDKVLKP : 124
PabFLA18.2 : --KP---FSINHVGKIPDAFT-NR-----WIAVHEVVRPFL- : 70
PabFLA19.2 : --KP---FSVNHVGKIPDAFT-NR-----WIAV----- : 70
PabFLA12 : VNVSTGL--VN--APV TSSI-FS-QA-----PVAVYEVNKVLPL : 114
PabFLA13 : VNISTGL--VN--TPVNSAV-YS-QN-----PVAVYQVDKVLPL : 84
PabFLA8 : VILNTGV---DKATV TSTL-LD-DV-----PMVILTVDKVLKP : 92
PabFLA14 : VTVSSGY--VS--TAVTGSV-RV-TD-----PVAVYTGKVLPL : 125
PabFLA23 : GK YV---VLNGRARVSPDLYG-DA-----NLIVHGLDRVL-- : 99
PpaFLA10.2 : VKFGDG---DDAAHFDHDIYV-DG-----HISVQGINRVLTP : 103
PpaFLA11.2 : VKFGDG---DGAAHCDHDIYV-EG-----HISVQGINRVLSP : 103
PpaFLA1 : SFTIG-A---GSNATVITAD-LR-VC-----NSVVHIVNTVLPL : 141
PpaFLA2 : SFVVG-T---GSNATVTAAD-VP-VC-----SSIVHVNNVLPL : 141
PpaFLA3 : VA----- : 106
PpaFLA5 : VVTI----- : 109
PtFLA1.2 : VKFGHT---ENSAYFDPDIYT-DG-----RISVQGI D G VIFP : 105
PtFLA19.2 : VKFGHA---ENSAYFDPDIYT-DG-----RISVQGI D G VIFP : 105
PtFLA6.2 : VKFGSG---DGSAYFDPDIYT-DG-----RISVQGI D G VIFP : 105
PtFLA8.2 : VKFGSG---DGSAYFDPDIYT-DG-----RISVQGI D G VIFP : 105
PtFLA5.2 : VTLKTRS---ITAKVGTI-ID-EQ-----PLAITYTIDKVLPL : 104
PtFLA22.2 : VTLKTRG---TTAKVGTI-ID-EQ-----PLAITYSIDKVLPL : 104
PtFLA42.2 : --DV---LVLNGVPIFPDMYQ-SD-----WLIITHGLNQLITP : 94
PtFLA37 : VDGS---ILVNRVRVSPDLFL-GS-----DIAVHGLDGLI-- : 105
PtFLA17 : VTLHTGI--GP--SRVAETV-LD-ST-----PLVIFTVDNVLPL : 132
PtFLA38.2 : VAIDSGI--VQ--ASVTQTV-FD-QN-----PVVIFGVSKVLPL : 138
PtFLA30.2 : VAIDSGI--VL--ASVTQTV-FD-QN-----PVAIFGVSKVLPL : 136
PtFLA20 : LNI STGL--TN--TTVSDTV-YT-DT-----HLAITYQVDKVLPL : 134
PtFLA23 : VNIT TGL--TN--TSVSGTI-YT-DN-----QLAVYQVDKVLPL : 134
PtFLA18 : VHLD SGW--SK--TKVSSSV-HS-TD-----PVAITYQVDKVLPL : 135
PtFLA10 : VNIT TGL--TN--TSVSGTI-YT-DN-----QLAVYQVDKVLPL : 134
PtFLA16.2 : VTLET KV---TTATVGTV-KD-EE-----PLVVYKINKVLPL : 130
PtFLA34 : VNIT TGL--TN--TSVSGTV-YT-DS-----QFAITYQIDKVLPL : 134
PtFLA9 : VNIT TGV--NT--ATVANTI-YT-DG-----QLVVYQVDQVLPL : 136
PtFLA12 : VHLD SGW--SK--TKVSSSV-HS-TD-----PVAVYQVDKVLPL : 135
PtFLA7 : VNIT TGV--NT--ATVANTI-FT-DG-----QLVVYQVDQVLPL : 136
PtFLA2 : VNIS SGL--TN--TSVSGTV-YT-DS-----QLAITYQLDKVLPL : 134
PtFLA13 : VNIT TGL--TN--TSVSGTV-YT-DN-----QLAITYKEKVLPL : 134
PtFLA47 : VNIT TGL--TN--TSVSGTV-YT-DN-----QLAITYKEKVLPL : 134
PtFLA40 : VNIT TGL--TN--TSVSGTV-YT-DN-----QLAITYKEKVLPL : 134
PtFLA28 : VNIT TGL--TN--TSVSGTV-YT-DN-----QLAITYKEKVLPL : 134
PtFLA39 : VNIT TGL--TN--TSVSGTV-YT-DN-----QLAITYKEKVLPL : 134
PtFLA50 : VNIT TGL--TN--TSVSGTV-YT-DN-----QLAITYKEKVLPL : 134
PtFLA29 : VNIT TGL--TN--TSVSGTV-YT-DN-----QLAITYKEKVLPL : 134
PtFLA32/49 : VNIT TGL--TN--TSVSGTV-YT-DN-----QLAITYKEKVLPL : 134
PtFLA45 : VNIT TGL--TN--TSVSGTV-YT-DN-----QLAITYKEKVLPL : 134
PtFLA35 : VNIT TGL--TN--TSVSGTV-YT-DN-----QLAITYKEKVLPL : 134
PtFLA46 : VTVSSGL--TK--TSV SNTI-YT-DK-----QVAITYEV D K VLP : 134
PtFLA3 : VNVSTGL--VE--VQVNNAL-RQ-DS-----PLAVYPV D K VLP : 135
PtFLA15 : VNVSTGL--VE--VQVNNAL-RQ-DF-----PLAVYPV D K VLP : 135
PtFLA14 : VNIT TGL--TN--TSVSGTV-YT-DN-----QLAITYKEKVLPL : 118
PtFLA48 : VNVTTGL--TN--TSVSAIV-YT-DS-----QLAITYQVDKVLPL : 135

```

```

PtFLA27      : VNVTSGL--TN--TS SAIV-YT-DS-----QLATYQVDKVLFP : 135
PtFLA43      : VNITSTGL--TN--TS SGTV-YT-DN-----QLATYKEKVLFP : 123
PtFLA33      : -----P SGTV-YT-DN-----QLATYKEKVLFP : 98
PtFLA21      : ----- : -
PtFLA26      : ----- : -
PtFLA4.2     : VTQG----LAINGVEAAPEIFS-SK-----EFIVHGH----- : 89
PtFLA44.2    : TAVP----MRINYVRVKVPDVMR-NL-----KIVVHAV----- : 74
SmoFLA3      : VQFGEG----ESGALYDHDIFT-DG-----HISTQGSKVL-- : 133
SmoFLA6.2    : VSFVTGL--NR--ADVTDTE-LD-TP-----PVAVYAVNRVLFP : 131
SmoFLA7.2    : VSLSTGV----DTADVSTI-YD-QP-----PTAAYS VNRVLFP : 134
SmoFLA8.2    : LAIATGV--ST--ANVIATL-LE-DD-----PVG VYALDAVLFP : 135
SmoFLA9.2    : ----- : -
SmoFLA4      : ATLSRPPHQSPPLATLRNVVQE-PF-----SITVYADRVLFP : 145
SmoFLA5      : VSVGWPSSTVFSSSLGTVKEL-PF-----NVSVDVSRVLFP : 143
BdiFLA23.2   : VKFGQG----EGSAYFDPDIYT-DG-----RISVQGD AVLFP : 105
BdiFLA22.2   : VKFGHG----EGSAYFDPDIYT-DG-----RISVQGD AVLFP : 105
BdiFLA9      : AALDTKV----ITASVTATV-KD-DD-----PLAVYAVSKFLQP : 106
BdiFLA1      : VNVSTGV--KGNMMLSTIV-SK-EF-----PLAVYSVDKVPFP : 107
BdiFLA20.2   : VAIDTGV--VQ--ASTRTV-FD-QN-----PVAVFVAVSKVLFP : 139
BdiFLA10     : VAIDTGV--VQ--ASTRTV-FD-QN-----PVAVFVAVSKVLFP : 139
BdiFLA11     : ISVKSMW--SK--PTSSSV-YA-TD-----PVAVYS LNKVLFP : 134
BdiFLA3      : VSMATGM----DKSRVASTV-LD-DT-----PVAVHTVDSVLFP : 132
BdiFLA12     : IRVKSMW--SN--PKSSSV-YS-TR-----PVAVYEV D KVLFP : 137
BdiFLA8      : VNVSSGV--SE--VTNNAL-SD-KK-----PLAVYSVDKVLFP : 138
BdiFLA13     : VNVSTGL--VS--TMVGTAL-RK-EK-----PLAVYSVDKVLFP : 136
BdiFLA4      : IRVVSSW--AD--AKVVRPV-YE-MP-----PMAVYEDRVLFP : 134
BdiFLA14     : VNIISTGV--VN--ASVSGTV-YT-GD-----RLVVYQVDKVLFP : 138
BdiFLA15     : VNIISTGV--VN--ATVDNTL-FT-GD-----QLVVYQV NQVLFP : 137
BdiFLA16     : TGVVSGW--AA--AKVSSV-YS-TR-----PVAVYALDRVLFP : 136
BdiFLA17     : VSVKTAG-KGKGAARVESTV-YD-KE-----PVAVYGVDAVLFP : 136
BdiFLA21.1   : ----- : -
BdiFLA21.2   : ----- : -
BdiFLA5      : VSLDTGV----RKSRAATV-LD-EV-----PLCVLTVDSSLMP : 137
BdiFLA18     : VAIKTGASPGGGVARVEATV-MD-RD-----PVAVYRLDAVVEP : 137
BdiFLA6      : ----- : -
BdiFLA19     : ----- : -
BdiFLA7      : ----- : -
MpoFLA6.2    : VTHHSST-PDKPVATQSTL-FD-AS-----PLVLYSIDEVLFP : 140
MpoFLA1      : IDGG-A----DTQATVTPD-VR-VC-----GSVVHIVNAVLP : 135
MpoFLA14.2   : VVFGEG----DDAAGVFDHDIFA-DG-----RLSVQGD RVMIP : 136
MpoFLA7.1    : LIGPAASASASNATVGTVLED-PY-----DISHIEDQVLKP : 142
MpoFLA7.2    : VTIKTGV--GN--ATVGEVL-YN-AN-----PVTMYAIDKVLFP : 132
MpoFLA2      : IIA--Q---ESNATVVTAD-VT-VC-----GSVVHII NHVLIP : 134
MpoFLA3      : IIA--Q---ESNATVVTAD-VT-VC-----GSVVHII NHVLIP : 134
MpoFLA8.2    : VRLRTGV--SV--ATVLEII-YD-AN-----PVTMYAIDEVLFP : 134
MpoFLA9/10   : VTLHTGV--ND--AKVETL-YD-AR-----PVTMFGID AVLFP : 134
MpoFLA11.2   : VTLHTGV--SV--ATVQETL-YD-AT-----PTTMFGIDQVLFP : 132
MpoFLA12.2   : VTLHTGV--SV--ATVQETL-YD-AT-----PTTMFGIDQVLFP : 132
MpoFLA13.2   : ----- : -
CcrFLA1.1    : -R-----DPSRRNPRDPN-VF-TQ-----NGWVHV IDTVLFP : 151
CcrFLA1.2    : -A-----DESRENPVADPN-FF-PQ-----NGWVHV IDTVLFP : 152
CcrFLA1.3    : -D-----DPSREDAVDPRN-IF-TQ-----NGWVHV IDSVLFP : 137
CcrFLA1.4    : -G-----DDSRDDAASTPN-IF-LQ-----NGWVHV VDSVLFP : 136
CbrFLA1      : IKVDGST--SVTEA---DFLVDS-PN-----KAVAHV IASVLL- : 131
CbrFLA2      : ----- : -
CbrFLA3      : VLD-----GQATVTGPDVKI-AV-----NATVHT IDTVMVP : 130
CbrFLA4      : AF-----IEGAKVVEPDLF-TG-----ESAVHGI DQIIM- : 126
CbrFLA7      : MVE-----GTARVVPDAIT-GV-----NATVHII NDIIFP : 132
CbrFLA9      : MVE-----GTARVVPDAIT-GV-----NATVHII NDIIFP : 132
CbrFLA11     : KLD-----MTAEVQADAIF-AG-----NGTVHV IDSVLIP : 135
CbrFLA15     : VFVDGA----QIFPSGGFDV-VT-AP-----DVVVQMVDTLLIP : 150
CbrFLA16.1   : TF-----VQGAGVTAADDII-RE-----DGVVHGI DSIIFP : 124
CbrFLA16.2   : VFVG----NAASLGQVTPDLYA-NP-----KITVVHGINKVLFP : 101
CbrFLA16.3   : LRVG----YSLALGSVAPDLYA-TS-----SITHGVDTVLFP : 98
CbrFLA16.4   : LMVG----YSSARGLVAPDLYA-TS-----KITIHGVD RVLFP : 123
CbrFLA19     : RISDDD---GGEAFVTRPDFRL-LI-----NSTIHVIDTVMIP : 135
CbrFLA20.1   : LT-----SVNNVEIRPDVYM-FP-----TKVVHGFSRIMLP : 109
CbrFLA22     : MLE-----DYAPITEPNALR-TS-----NATVHLL GELLVP : 129
CbrFLA23     : VLE-----GYASVTGPDALK-SP-----NATVHLL GELLVP : 128
CbrFLA24     : VLE-----GYAAVTGPDALT-SP-----NATVHLL GELLVP : 128

```
